# Supplementary material for: Full-Length Transcriptome Sequencing Reveals Tissue-Specific Gene Expression Profile of Mangrove Clam Geloina erosa
Source: Front Physiol. 2022 Apr 20;13:851957. doi: 10.3389/fphys.2022.851957 (PMC9065350; doi:10.3389/fphys.2022.851957)
Supplement: Supplementary file 2 [file Table3.XLSX]

## Sheet: 1-1 Integrated_Function.anno
#GeneID	COG_class	COG_class_annotation	GO_annotation	KEGG_annotation	KEGG_pathway	KOG_class	KOG_class_annotation	Pfam_annotation	Swissprot_annotation	eggNOG_class	eggNOG_class_annotation	nr_annotation
F01.PB18830	--	--	--	K12026|1.93722e-09|lgi:LOTGIDRAFT_170455|hypothetical protein; K12026 tripartite motif-containing protein 56 [EC:6.3.2.19] (A)	--	--	--	NHL repeat;; B-box zinc finger	--	S	Function unknown	Tripartite motif-containing protein 45 [Crassostrea gigas]
F01.PB15514	[J]	Translation, ribosomal structure and biogenesis	Cellular Component: chromosome, centromeric region (GO:0000775);; Molecular Function: GTPase activity (GO:0003924);; Molecular Function: GTP binding (GO:0005525);; Cellular Component: nucleus (GO:0005634);; Cellular Component: mitochondrion (GO:0005739);; Biological Process: GTP catabolic process (GO:0006184);; Biological Process: translation (GO:0006412);; Biological Process: mitotic nuclear div…	K02355|8.30286e-107|lgi:LOTGIDRAFT_187106|hypothetical protein; K02355 elongation factor G (A)	--	[J]	Translation, ribosomal structure and biogenesis	Elongation factor G, domain IV;; Elongation factor G C-terminus;; Elongation factor Tu GTP binding domain	Elongation factor G, mitochondrial {ECO:0000255|HAMAP-Rule:MF_03061} (Precursor) GN=ico OS=Drosophila virilis (Fruit fly) PE=3 SV=1	J	Translation, ribosomal structure and biogenesis	hypothetical protein LOTGIDRAFT_187106 [Lottia gigantea]
F01.PB19819	--	--	--	--	--	--	--	--	--	--	--	hypothetical protein CGI_10009268 [Crassostrea gigas]
F01.PB12392	--	--	--	K06530|0|tad:TRIADDRAFT_55768|hypothetical protein; K06530 CD109 antigen (A)	--	[O]	Posttranslational modification, protein turnover, chaperones	A-macroglobulin complement component;; Alpha-2-macroglobulin family;; Alpha-2-macroglobulin family N-terminal region;; A-macroglobulin receptor;; Alpha-macro-globulin thiol-ester bond-forming region;; MG2 domain;; Prenyltransferase-like	--	S	Function unknown	thioester-containing protein-D [Azumapecten farreri]
F01.PB19394	--	--	--	K11855|3.79904e-06|cin:100184355|ubiquitin carboxyl-terminal hydrolase 36-like; K11855 ubiquitin carboxyl-terminal hydrolase 36/42 [EC:3.4.19.12] (A)	--	--	--	--	--	--	--	PREDICTED: ubiquitin carboxyl-terminal hydrolase 36-like [Ciona intestinalis]
F01.PB15343	--	--	--	K05309|1.27626e-63|lgi:LOTGIDRAFT_180368|hypothetical protein; K05309 microsomal prostaglandin-E synthase 2 [EC:5.3.99.3] (A)	ko00590:Arachidonic acid metabolism	[R]	General function prediction only	Glutathione S-transferase, C-terminal domain;; Glutathione S-transferase, C-terminal domain	--	I	Lipid transport and metabolism	PREDICTED: prostaglandin E synthase 2-like [Aplysia californica]
F01.PB7591	--	--	--	K17606|2.26369e-95|lgi:LOTGIDRAFT_232515|hypothetical protein; K17606 immunoglobulin-binding protein 1 (A)	--	[T]	Signal transduction mechanisms	TAP42-like family	--	S	Function unknown	hypothetical protein LOTGIDRAFT_232515 [Lottia gigantea]
F01.PB3850	--	--	Molecular Function: sequence-specific DNA binding transcription factor activity (GO:0003700);; Biological Process: regulation of transcription, DNA-templated (GO:0006355);; Molecular Function: sequence-specific DNA binding (GO:0043565);;	--	--	--	--	bZIP transcription factor;; Basic region leucine zipper	--	K	Transcription	hypothetical protein LOTGIDRAFT_59424, partial [Lottia gigantea]
F01.PB1894	--	--	--	--	--	[R]	General function prediction only	Immunoglobulin I-set domain;; Immunoglobulin domain;; Fibronectin type III domain	Muscle M-line assembly protein unc-89 GN=unc-89 OS=Caenorhabditis elegans PE=1 SV=3	S	Function unknown	hypothetical protein CAPTEDRAFT_197591 [Capitella teleta]
F01.PB1689	--	--	Molecular Function: hydrolase activity, hydrolyzing O-glycosyl compounds (GO:0004553);; Biological Process: metabolic process (GO:0008152);;	K01204|4.18883e-164|lgi:LOTGIDRAFT_209340|hypothetical protein; K01204 alpha-N-acetylgalactosaminidase [EC:3.2.1.49] (A)	ko00603:Glycosphingolipid biosynthesis - globo series;ko04142:Lysosome	[G]	Carbohydrate transport and metabolism	Melibiase	Probable alpha-galactosidase (Precursor) GN=melA OS=Dictyostelium discoideum (Slime mold) PE=3 SV=1	G	Carbohydrate transport and metabolism	hypothetical protein LOTGIDRAFT_209340 [Lottia gigantea]
F01.PB11490	--	--	--	--	--	--	--	--	--	S	Function unknown	Uncharacterized protein C19orf55-like protein [Crassostrea gigas]
F01.PB6799	--	--	Biological Process: cellular protein modification process (GO:0006464);; Biological Process: response to stress (GO:0006950);; Biological Process: regulation of cellular metabolic process (GO:0031323);; Biological Process: cellular macromolecule biosynthetic process (GO:0034645);;	--	--	[O]	Posttranslational modification, protein turnover, chaperones	Hsp20/alpha crystallin family	Heat shock protein Hsp-12.2 GN=hsp-12.2 OS=Caenorhabditis elegans PE=3 SV=1	O	Posttranslational modification, protein turnover, chaperones	heat shock protein 22 isoform 2 [Ruditapes philippinarum]
F01.PB11128	--	--	--	K18161|3.18857e-11|hro:HELRODRAFT_185592|hypothetical protein; K18161 NADH dehydrogenase [ubiquinone] 1 alpha subcomplex assembly factor 4 (A)	--	--	--	Uncharacterised protein family (UPF0240)	--	O	Posttranslational modification, protein turnover, chaperones	hypothetical protein KGM_21446 [Danaus plexippus]
F01.PB5365	--	--	--	K13165|1.6777e-100|lgi:LOTGIDRAFT_121003|hypothetical protein; K13165 splicing factor, arginine/serine-rich 12 (A)	--	[A]	RNA processing and modification	RNA recognition motif. (a.k.a. RRM, RBD, or RNP domain);; RNA recognition motif. (a.k.a. RRM, RBD, or RNP domain);; RNA recognition motif. (a.k.a. RRM, RBD, or RNP domain)	Probable splicing factor, arginine/serine-rich 7 GN=rsp-7 OS=Caenorhabditis elegans PE=3 SV=3	S	Function unknown	Putative splicing factor, arginine/serine-rich 7 [Crassostrea gigas]
F01.PB6845	[H]	Coenzyme transport and metabolism	Molecular Function: methionine adenosyltransferase activity (GO:0004478);; Molecular Function: ATP binding (GO:0005524);; Biological Process: S-adenosylmethionine biosynthetic process (GO:0006556);; Biological Process: one-carbon metabolic process (GO:0006730);; Molecular Function: metal ion binding (GO:0046872);;	K00789|0|lgi:LOTGIDRAFT_141813|hypothetical protein; K00789 S-adenosylmethionine synthetase [EC:2.5.1.6] (A)	ko00270:Cysteine and methionine metabolism;ko01230:Biosynthesis of amino acids	[H]	Coenzyme transport and metabolism	S-adenosylmethionine synthetase, C-terminal domain;; S-adenosylmethionine synthetase, central domain;; S-adenosylmethionine synthetase, N-terminal domain;; S-adenosylmethionine synthetase, N-terminal domain	S-adenosylmethionine synthase GN=Sam-S OS=Drosophila melanogaster (Fruit fly) PE=2 SV=2	H	Coenzyme transport and metabolism	hypothetical protein LOTGIDRAFT_141813 [Lottia gigantea]
F01.PB16869	--	--	--	--	--	--	--	NACHT domain	--	--	--	hypothetical protein BRAFLDRAFT_81619 [Branchiostoma floridae]
F01.PB8324	--	--	--	--	--	--	--	--	--	S	Function unknown	hypothetical protein CGI_10021888 [Crassostrea gigas]
F01.PB1091	[B]	Chromatin structure and dynamics	Cellular Component: nucleosome (GO:0000786);; Molecular Function: DNA binding (GO:0003677);; Cellular Component: nucleus (GO:0005634);; Biological Process: nucleosome assembly (GO:0006334);; Molecular Function: protein heterodimerization activity (GO:0046982);;	K11254|3.30853e-65|oaa:100093156|uncharacterized LOC100093156; K11254 histone H4 (A)	ko05034:Alcoholism;ko05203:Viral carcinogenesis;ko05322:Systemic lupus erythematosus	[B]	Chromatin structure and dynamics	--	H3F GN=HHT2 OS=Tetrahymena thermophila PE=1 SV=2	B	Chromatin structure and dynamics	Histone H3.3 [Lepeophtheirus salmonis]
F01.PB9407	--	--	--	--	--	[O]	Posttranslational modification, protein turnover, chaperones	--	--	O	Posttranslational modification, protein turnover, chaperones	Heat shock 70 kDa protein 12A [Crassostrea gigas]
F01.PB6854	[Q]	Secondary metabolites biosynthesis, transport and catabolism	--	--	--	--	--	DSBA-like thioredoxin domain;; Thioredoxin	--	Q	Secondary metabolites biosynthesis, transport and catabolism	hypothetical protein CGI_10026322 [Crassostrea gigas]
F01.PB13076	--	--	--	K08341|3.29131e-70|lgi:LOTGIDRAFT_182626|hypothetical protein; K08341 GABA(A) receptor-associated protein (A)	ko04068:FoxO signaling pathway;ko04140:Regulation of autophagy	[Z]	Cytoskeleton	Autophagy protein Atg8 ubiquitin like;; Ubiquitin-like autophagy protein Apg12	Protein lgg-1 GN=lgg-1 OS=Caenorhabditis elegans PE=1 SV=1	U	Intracellular trafficking, secretion, and vesicular transport	GABAA receptor-associated protein [Meretrix meretrix]
F01.PB2570	--	--	--	--	--	--	--	--	--	S	Function unknown	hypothetical protein CGI_10022227 [Crassostrea gigas]
F01.PB7922	[S]	Function unknown	Molecular Function: nucleic acid binding (GO:0003676);; Cellular Component: ribonucleoprotein complex (GO:0030529);;	K11092|8.39794e-95|lcm:102345101|SNRPA1; small nuclear ribonucleoprotein polypeptide A'; K11092 U2 small nuclear ribonucleoprotein A' (A)	ko03040:Spliceosome	[A]	RNA processing and modification	Leucine-rich repeat;; Leucine Rich repeats (2 copies);; Leucine rich repeat	Probable U2 small nuclear ribonucleoprotein A&apos; GN=U2A OS=Drosophila melanogaster (Fruit fly) PE=1 SV=1	S	Function unknown	PREDICTED: U2 small nuclear ribonucleoprotein A&apos;-like [Saccoglossus kowalevskii]
F01.PB7592	[K]	Transcription	--	K12605|1.74583e-125|bta:533945|CNOT2; CCR4-NOT transcription complex, subunit 2; K12605 CCR4-NOT transcription complex subunit 2 (A)	ko03018:RNA degradation	[KDR]	--	NOT2 / NOT3 / NOT5 family	Regulator of gene activity GN=Rga OS=Drosophila melanogaster (Fruit fly) PE=1 SV=2	K	Transcription	CCR4-NOT transcription complex subunit 2 [Pinctada fucata]
F01.PB14634	[P]	Inorganic ion transport and metabolism	--	K14703|9.59788e-171|lgi:LOTGIDRAFT_192974|hypothetical protein; K14703 solute carrier family 26, member 5 (A)	--	[P]	Inorganic ion transport and metabolism	Sulfate transporter family;; STAS domain;; Sulfate transporter N-terminal domain with GLY motif	Sulfate permease family protein 3 GN=sulp-3 OS=Caenorhabditis elegans PE=2 SV=3	P	Inorganic ion transport and metabolism	hypothetical protein LOTGIDRAFT_192974, partial [Lottia gigantea]
F01.PB10933	--	--	Molecular Function: binding (GO:0005488);;	--	--	[U]	Intracellular trafficking, secretion, and vesicular transport	A20-like zinc finger;; Vacuolar sorting protein 9 (VPS9) domain;; Vacuolar sorting protein 9 (VPS9) domain	--	S	Function unknown	Rab5 GDP/GTP exchange factor [Crassostrea gigas]
F01.PB5714	[R]	General function prediction only	Molecular Function: metal ion binding (GO:0046872);;	--	--	[R]	General function prediction only	Zinc finger, C2H2 type;; C2H2-type zinc finger;; Zinc-finger double domain;; Zinc-finger double-stranded RNA-binding;; Zinc-finger of C2H2 type	Zinc finger protein squeeze GN=sqz OS=Drosophila melanogaster (Fruit fly) PE=1 SV=2	S	Function unknown	hypothetical protein CGI_10013729 [Crassostrea gigas]
F01.PB2438	--	--	--	--	--	--	--	Avidin family	--	S	Function unknown	--
F01.PB12999	--	--	--	K12607|0|lgi:LOTGIDRAFT_114420|hypothetical protein; K12607 CCR4-NOT transcription complex subunit 10 (A)	ko03018:RNA degradation	[R]	General function prediction only	TPR repeat;; Tetratricopeptide repeat	CCR4-NOT transcription complex subunit 10 GN=Not10 OS=Drosophila melanogaster (Fruit fly) PE=1 SV=1	K	Transcription	CCR4-NOT transcription complex subunit 10 [Crassostrea gigas]
F01.PB11362	[U]	Intracellular trafficking, secretion, and vesicular transport	Biological Process: cell morphogenesis (GO:0000902);; Molecular Function: structural molecule activity (GO:0005198);; Biological Process: intracellular protein transport (GO:0006886);; Biological Process: retrograde vesicle-mediated transport, Golgi to ER (GO:0006890);; Biological Process: phagocytosis (GO:0006909);; Biological Process: regulation of lipid storage (GO:0010883);; Cellular Componen…	K17301|0|lgi:LOTGIDRAFT_183679|hypothetical protein; K17301 coatomer, subunit beta (A)	--	[U]	Intracellular trafficking, secretion, and vesicular transport	Adaptin N terminal region;; HEAT repeats;; HEAT repeat;; non-SMC mitotic condensation complex subunit 1;; Coatomer beta subunit appendage platform;; Coatomer beta C-terminal region	Coatomer subunit beta GN=betaCop OS=Drosophila melanogaster (Fruit fly) PE=2 SV=2	U	Intracellular trafficking, secretion, and vesicular transport	PREDICTED: coatomer subunit beta-like isoform X1 [Aplysia californica]
F01.PB9466	--	--	--	K09142|3.91435e-100|spu:587907|uncharacterized LOC587907; K09142 hypothetical protein (A)	--	[S]	Function unknown	Putative RNA methyltransferase;; Putative RNA methyltransferase;; Putative RNA methyltransferase	Putative methyltransferase B0361.6 {ECO:0000305} GN=B0361.6 OS=Caenorhabditis elegans PE=3 SV=1	S	Function unknown	PREDICTED: uncharacterized protein C9orf114-like [Strongylocentrotus purpuratus]
F01.PB1506	[R]	General function prediction only	--	K00415|1.30108e-85|bfo:BRAFLDRAFT_119024|hypothetical protein; K00415 ubiquinol-cytochrome c reductase core subunit 2 (A)	ko00190:Oxidative phosphorylation	[C]	Energy production and conversion	Peptidase M16 inactive domain;; Insulinase (Peptidase family M16)	Cytochrome b-c1 complex subunit 1, mitochondrial GN=ucr-1 OS=Caenorhabditis elegans PE=3 SV=2	O	Posttranslational modification, protein turnover, chaperones	PREDICTED: cytochrome b-c1 complex subunit 2, mitochondrial-like isoform X2 [Aplysia californica]
F01.PB8178	--	--	--	K07847|1.13361e-23|lgi:LOTGIDRAFT_159041|hypothetical protein; K07847 Rad and Gem related GTP binding protein 1 (A)	--	[R]	General function prediction only	Ras family	--	S	Function unknown	PREDICTED: GTP-binding protein REM 1-like [Aplysia californica]
F01.PB5204	--	--	--	--	--	--	--	--	--	--	--	PREDICTED: uncharacterized protein LOC101852025 [Aplysia californica]
F01.PB14502	--	--	--	--	--	--	--	--	--	--	--	hypothetical protein Y032_0153g2941 [Ancylostoma ceylanicum]
F01.PB8358	[R]	General function prediction only	--	K08743|6.51503e-64|lgi:LOTGIDRAFT_111076|hypothetical protein; K08743 ectonucleotide pyrophosphatase/phosphodiesterase family member 6 [EC:3.1.4.-] (A)	ko00565:Ether lipid metabolism	[R]	General function prediction only	Type I phosphodiesterase / nucleotide pyrophosphatase;; Type I phosphodiesterase / nucleotide pyrophosphatase	Ectonucleotide pyrophosphatase/phosphodiesterase C27A7.3 GN=C27A7.3 OS=Caenorhabditis elegans PE=3 SV=3	S	Function unknown	hypothetical protein LOTGIDRAFT_111076 [Lottia gigantea]
F01.PB1628	--	--	--	K08882|5.07061e-13|acs:100565388|trim28; tripartite motif containing 28; K08882 tripartite motif-containing protein 28 [EC:6.3.2.19] (A)	--	[O]	Posttranslational modification, protein turnover, chaperones	B-box zinc finger	--	B	Chromatin structure and dynamics	hypothetical protein BRAFLDRAFT_63830 [Branchiostoma floridae]
F01.PB22070	--	--	Molecular Function: hydrolase activity (GO:0016787);;	K11834|0|lgi:LOTGIDRAFT_166748|hypothetical protein; K11834 ubiquitin carboxyl-terminal hydrolase 44/49 [EC:3.4.19.12] (A)	--	[O]	Posttranslational modification, protein turnover, chaperones	Ubiquitin carboxyl-terminal hydrolase;; Ubiquitin carboxyl-terminal hydrolase;; Zn-finger in ubiquitin-hydrolases and other protein	Ubiquitin carboxyl-terminal hydrolase nonstop GN=not OS=Drosophila melanogaster (Fruit fly) PE=1 SV=3	O	Posttranslational modification, protein turnover, chaperones	hypothetical protein LOTGIDRAFT_166748 [Lottia gigantea]
F01.PB15174	[E]	Amino acid transport and metabolism	--	K01262|2.55839e-150|myb:102254608|XPNPEP1; X-prolyl aminopeptidase (aminopeptidase P) 1, soluble; K01262 Xaa-Pro aminopeptidase [EC:3.4.11.9] (A)	--	[E]	Amino acid transport and metabolism	Metallopeptidase family M24;; Creatinase/Prolidase N-terminal domain	Xaa-Pro aminopeptidase 1 GN=xpnpep1 OS=Dictyostelium discoideum (Slime mold) PE=3 SV=1	E	Amino acid transport and metabolism	Xaa-Pro aminopeptidase 1 [Crassostrea gigas]
F01.PB21386	--	--	Molecular Function: oxo-acid-lyase activity (GO:0016833);;	K11390|7.045e-116|lgi:LOTGIDRAFT_127794|hypothetical protein; K11390 citrate lyase subunit beta-like protein [EC:4.1.-.-] (A)	--	--	--	HpcH/HpaI aldolase/citrate lyase family	--	G	Carbohydrate transport and metabolism	Citrate lyase subunit beta-like protein, mitochondrial [Crassostrea gigas]
F01.PB2085	--	--	--	--	--	--	--	Zinc finger, C3HC4 type (RING finger)	--	--	--	hypothetical protein HELRODRAFT_168955 [Helobdella robusta]
F01.PB18119	--	--	Molecular Function: Rab GTPase activator activity (GO:0005097);; Molecular Function: 2-alkenal reductase [NAD(P)] activity (GO:0032440);; Biological Process: positive regulation of Rab GTPase activity (GO:0032851);; Biological Process: oxidation-reduction process (GO:0055114);;	--	--	--	--	--	--	S	Function unknown	hypothetical protein CGI_10014955 [Crassostrea gigas]
F01.PB20869	--	--	Molecular Function: transcription cofactor activity (GO:0003712);; Molecular Function: histone acetyltransferase activity (GO:0004402);; Cellular Component: nucleus (GO:0005634);; Biological Process: regulation of transcription, DNA-templated (GO:0006355);; Molecular Function: zinc ion binding (GO:0008270);; Biological Process: histone acetylation (GO:0016573);;	--	--	[K]	Transcription	TAZ zinc finger;; Miro-like protein;; Ras family;; Elongation factor Tu GTP binding domain;; Death domain	Protein cbp-1 GN=cbp-1 OS=Caenorhabditis elegans PE=1 SV=6	B	Chromatin structure and dynamics	PREDICTED: uncharacterized protein LOC100888891 [Strongylocentrotus purpuratus]
F01.PB13758	--	--	--	K08881|4.70633e-10|dre:442869|trim24, tif1a, tifa, wu:fi24g04; tripartite motif containing 24; K08881 tripartite motif-containing protein 24 [EC:6.3.2.19] (A)	--	[O]	Posttranslational modification, protein turnover, chaperones	B-box zinc finger;; NHL repeat	--	S	Function unknown	Tripartite motif-containing protein 56 [Crassostrea gigas]
F01.PB21406	--	--	Molecular Function: transferase activity, transferring phosphorus-containing groups (GO:0016772);;	K06640|5.10889e-131|lcm:102354343|ATR; ataxia telangiectasia and Rad3 related; K06640 serine/threonine-protein kinase ATR [EC:2.7.11.1] (A)	ko03460:Fanconi anemia pathway;ko04110:Cell cycle;ko04115:p53 signaling pathway	[TBLD]	--	UME (NUC010) domain	Probable serine/threonine-protein kinase atr1 GN=atr1 OS=Dictyostelium discoideum (Slime mold) PE=3 SV=1	BDLTU	--	PREDICTED: serine/threonine-protein kinase ATR-like [Strongylocentrotus purpuratus]
F01.PB7261	--	--	--	K17353|4.44923e-17|lgi:LOTGIDRAFT_239323|hypothetical protein; K17353 tetraspanin-18 (A)	--	[R]	General function prediction only	Tetraspanin family	--	--	--	Transient receptor potential cation channel subfamily V member 6 [Crassostrea gigas]
F01.PB13769	[R]	General function prediction only	--	K12795|9.70278e-75|hmg:100210536|suppressor of G2 allele of SKP1 homolog; K12795 suppressor of G2 allele of SKP1 (A)	--	[T]	Signal transduction mechanisms	SGS domain;; CS domain;; TPR repeat;; Tetratricopeptide repeat;; Tetratricopeptide repeat;; Tetratricopeptide repeat;; Tetratricopeptide repeat;; Tetratricopeptide repeat;; Tetratricopeptide repeat	Protein SUGT1 homolog GN=sugt1 OS=Dictyostelium discoideum (Slime mold) PE=2 SV=1	S	Function unknown	Suppressor of G2 allele of SKP1-like protein [Crassostrea gigas]
F01.PB9058	--	--	--	--	--	[R]	General function prediction only	YT521-B-like domain	--	S	Function unknown	PREDICTED: YTH domain family protein 3-like [Saccoglossus kowalevskii]
F01.PB15413	[R]	General function prediction only	--	--	--	[R]	General function prediction only	Zinc finger, C2H2 type;; Zinc-finger double domain;; C2H2-type zinc finger;; Zinc-finger double-stranded RNA-binding;; C2H2 type zinc-finger (2 copies)	Protein suppressor of hairy wing GN=su(Hw) OS=Drosophila melanogaster (Fruit fly) PE=1 SV=2	S	Function unknown	hypothetical protein CGI_10019085 [Crassostrea gigas]
F01.PB1847	[R]	General function prediction only	--	K14793|6.08159e-172|spu:582919|U3 small nucleolar RNA-interacting protein 2-like; K14793 ribosomal RNA-processing protein 9 (A)	--	[A]	RNA processing and modification	WD domain, G-beta repeat	Myosin heavy chain kinase A GN=mhkA OS=Dictyostelium discoideum (Slime mold) PE=1 SV=2	S	Function unknown	PREDICTED: U3 small nucleolar RNA-interacting protein 2-like [Saccoglossus kowalevskii]
F01.PB13975	--	--	--	--	--	--	--	--	--	--	--	hypothetical protein CGI_10007581 [Crassostrea gigas]
F01.PB11464	[P]	Inorganic ion transport and metabolism	Biological Process: sulfate assimilation (GO:0000103);; Molecular Function: adenylylsulfate kinase activity (GO:0004020);; Molecular Function: sulfate adenylyltransferase (ATP) activity (GO:0004781);; Molecular Function: ATP binding (GO:0005524);; Biological Process: phosphorylation (GO:0016310);;	K13811|0|lgi:LOTGIDRAFT_230274|hypothetical protein; K13811 3'-phosphoadenosine 5'-phosphosulfate synthase [EC:2.7.7.4 2.7.1.25] (A)	ko00230:Purine metabolism;ko00450:Selenocompound metabolism;ko00920:Sulfur metabolism	[F]	Nucleotide transport and metabolism	Adenylylsulphate kinase;; ATP-sulfurylase;; PUA-like domain;; AAA domain;; AAA domain;; AAA domain	Adenylyl-sulfate kinase OS=Urechis caupo (Innkeeper worm) PE=2 SV=1	P	Inorganic ion transport and metabolism	Bifunctional 3&apos;-phosphoadenosine 5&apos;-phosphosulfate synthetase [Crassostrea gigas]
F01.PB9284	[K]	Transcription	Biological Process: DNA-templated transcription, initiation (GO:0006352);; Molecular Function: protein heterodimerization activity (GO:0046982);;	K14535|9.7842e-67|lgi:LOTGIDRAFT_109218|hypothetical protein; K14535 transcription initiation factor TFIID subunit 9 (A)	ko03022:Basal transcription factors	[K]	Transcription	Transcription initiation factor IID, 31kD subunit;; Kinetochore component CENP-S	Transcription initiation factor TFIID subunit 9 GN=e(y)1 OS=Drosophila melanogaster (Fruit fly) PE=1 SV=1	K	Transcription	PREDICTED: transcription initiation factor TFIID subunit 9-like isoform X1 [Aplysia californica]
F01.PB15840	--	--	--	--	--	--	--	--	--	S	Function unknown	F-box/WD repeat-containing protein 7 [Crassostrea gigas]
F01.PB8734	--	--	--	--	--	[O]	Posttranslational modification, protein turnover, chaperones	--	--	--	--	hypothetical protein LOTGIDRAFT_174864 [Lottia gigantea]
F01.PB9433	[IQR]	--	--	K11170|5.52604e-51|xla:447183|dhrsx; dehydrogenase/reductase (SDR family) X-linked; K11170 dehydrogenase/reductase SDR family member X [EC:1.1.-.-] (A)	--	[Q]	Secondary metabolites biosynthesis, transport and catabolism	short chain dehydrogenase	WW domain-containing oxidoreductase GN=Wwox OS=Drosophila melanogaster (Fruit fly) PE=2 SV=1	S	Function unknown	PREDICTED: dehydrogenase/reductase SDR family member on chromosome X-like [Strongylocentrotus purpuratus]
F01.PB14463	--	--	--	--	--	[Z]	Cytoskeleton	Troponin;; Troponin	Troponin I OS=Chlamys nipponensis akazara (Akazara scallop) PE=1 SV=2	--	--	hypothetical protein LOTGIDRAFT_200673 [Lottia gigantea]
F01.PB14940	[E]	Amino acid transport and metabolism	Molecular Function: glutamate-ammonia ligase activity (GO:0004356);; Biological Process: glutamine biosynthetic process (GO:0006542);;	K01915|2.83674e-160|lgi:LOTGIDRAFT_184997|hypothetical protein; K01915 glutamine synthetase [EC:6.3.1.2] (A)	ko00250:Alanine, aspartate and glutamate metabolism;ko00330:Arginine and proline metabolism;ko00630:Glyoxylate and dicarboxylate metabolism;ko00910:Nitrogen metabolism;ko01230:Biosynthesis of amino acids	[E]	Amino acid transport and metabolism	Glutamine synthetase, catalytic domain;; Glutamine synthetase, beta-Grasp domain	Glutamine synthetase 2 cytoplasmic GN=Gs2 OS=Drosophila melanogaster (Fruit fly) PE=2 SV=3	E	Amino acid transport and metabolism	Glutamine synthetase [Crassostrea gigas]
F01.PB21206	--	--	Cellular Component: cell cortex (GO:0005938);; Biological Process: asymmetric protein localization (GO:0008105);; Biological Process: regulation of Cdc42 GTPase activity (GO:0043088);;	--	--	[T]	Signal transduction mechanisms	SH2 domain;; Phorbol esters/diacylglycerol binding domain (C1 domain);; RhoGAP domain	Serine/threonine-protein kinase dkf-2 {ECO:0000303|PubMed:17728253} GN=dkf-2 OS=Caenorhabditis elegans PE=1 SV=4	S	Function unknown	N-chimaerin [Crassostrea gigas]
F01.PB10757	--	--	Molecular Function: carbohydrate binding (GO:0030246);;	K06832|1.09533e-61|bfo:BRAFLDRAFT_126856|hypothetical protein; K06832 galectin-8 (A)	--	[W]	Extracellular structures	Galactoside-binding lectin;; Galactoside-binding lectin	32 kDa beta-galactoside-binding lectin lec-3 GN=lec-3 OS=Caenorhabditis elegans PE=2 SV=3	S	Function unknown	tandem repeat galectin [Ruditapes philippinarum]
F01.PB14121	--	--	Biological Process: metabolic process (GO:0008152);; Molecular Function: transferase activity, transferring acyl groups (GO:0016746);;	K13509|1.36318e-12|lgi:LOTGIDRAFT_142903|hypothetical protein; K13509 lysophosphatidate acyltransferase [EC:2.3.1.51] (A)	ko00561:Glycerolipid metabolism;ko00564:Glycerophospholipid metabolism	--	--	--	--	I	Lipid transport and metabolism	hypothetical protein LOTGIDRAFT_142903 [Lottia gigantea]
F01.PB20272	--	--	--	--	--	--	--	--	--	--	--	Sushi domain-containing protein 2 [Crassostrea gigas]
F01.PB9201	--	--	--	K09228|1.546e-09|cfr:102511178|zinc finger protein 850-like; K09228 KRAB domain-containing zinc finger protein (A)	--	[R]	General function prediction only	Mab-21 protein	Protein mab-21-like GN=CG4766 OS=Drosophila melanogaster (Fruit fly) PE=1 SV=1	O	Posttranslational modification, protein turnover, chaperones	LD42046p [Drosophila melanogaster]
F01.PB16066	--	--	--	--	--	--	--	NACHT domain	--	--	--	--
F01.PB7674	[O]	Posttranslational modification, protein turnover, chaperones	Molecular Function: ATP binding (GO:0005524);; Molecular Function: microtubule-severing ATPase activity (GO:0008568);;	K12196|0|mze:101481666|vacuolar protein sorting-associated protein 4B-like; K12196 vacuolar protein-sorting-associated protein 4 (A)	ko04144:Endocytosis	[O]	Posttranslational modification, protein turnover, chaperones	ATPase family associated with various cellular activities (AAA);; Vps4 C terminal oligomerisation domain;; MIT (microtubule interacting and transport) domain;; AAA domain (dynein-related subfamily);; IstB-like ATP binding protein;; Holliday junction DNA helicase ruvB N-terminus;; Protein of unknown function (DUF815)	Vacuolar protein sorting-associated protein 4 GN=vps4 OS=Dictyostelium discoideum (Slime mold) PE=3 SV=1	O	Posttranslational modification, protein turnover, chaperones	Vacuolar protein sorting-associated protein 4B [Crassostrea gigas]
F01.PB7098	[IQR]	--	--	K11161|3.31262e-99|xla:444106|rdh13; retinol dehydrogenase 13 (all-trans/9-cis); K11161 retinol dehydrogenase 13 [EC:1.1.1.300] (A)	--	[Q]	Secondary metabolites biosynthesis, transport and catabolism	short chain dehydrogenase;; KR domain;; Enoyl-(Acyl carrier protein) reductase;; NAD dependent epimerase/dehydratase family	WW domain-containing oxidoreductase GN=Wwox OS=Drosophila melanogaster (Fruit fly) PE=2 SV=1	S	Function unknown	PREDICTED: retinol dehydrogenase 13-like isoform X3 [Aplysia californica]
F01.PB16105	[R]	General function prediction only	--	K17554|3.95144e-105|ame:410220|uncharacterized LOC410220; K17554 apoptosis-stimulating of p53 protein 1 (A)	--	[D]	Cell cycle control, cell division, chromosome partitioning	Ankyrin repeat;; Ankyrin repeats (3 copies);; Ankyrin repeats (many copies);; Ankyrin repeats (many copies);; Ankyrin repeat;; SH3 domain;; Variant SH3 domain;; Variant SH3 domain	Apoptotic enhancer 1 protein GN=ape-1 OS=Caenorhabditis elegans PE=1 SV=1	T	Signal transduction mechanisms	PREDICTED: apoptosis-stimulating of p53 protein 2-like isoform X7 [Aplysia californica]
F01.PB21685	--	--	--	--	--	--	--	--	--	--	--	hypothetical protein CGI_10028681 [Crassostrea gigas]
F01.PB4037	--	--	--	--	--	--	--	C1q domain	--	S	Function unknown	Cerebellin-1 [Crassostrea gigas]
F01.PB13863	[R]	General function prediction only	--	--	--	[R]	General function prediction only	Zinc-finger double domain;; Zinc-finger double domain;; Zinc finger, C2H2 type;; C2H2-type zinc finger	Transcription factor hamlet GN=ham OS=Drosophila melanogaster (Fruit fly) PE=2 SV=1	S	Function unknown	Zinc finger protein 91, partial [Stegodyphus mimosarum]
F01.PB3166	[L]	Replication, recombination and repair	Molecular Function: oxidoreductase activity, acting on paired donors, with incorporation or reduction of molecular oxygen, 2-oxoglutarate as one donor, and incorporation of one atom each of oxygen into both donors (GO:0016706);; Biological Process: oxidation-reduction process (GO:0055114);;	K10765|3.75636e-19|lgi:LOTGIDRAFT_228010|hypothetical protein; K10765 alkylated DNA repair protein alkB homolog 1 [EC:1.14.11.- 4.2.99.18] (A)	--	[A]	RNA processing and modification	2OG-Fe(II) oxygenase superfamily	Alpha-ketoglutarate-dependent dioxygenase alkB GN=alkB OS=Dictyostelium discoideum (Slime mold) PE=2 SV=1	L	Replication, recombination and repair	hypothetical protein LOTGIDRAFT_228010 [Lottia gigantea]
F01.PB7557	[R]	General function prediction only	Molecular Function: nucleotide binding (GO:0000166);; Molecular Function: nucleic acid binding (GO:0003676);;	K12840|1.55913e-76|lgi:LOTGIDRAFT_113486|hypothetical protein; K12840 splicing factor 45 (A)	ko03040:Spliceosome	[A]	RNA processing and modification	G-patch domain;; RNA recognition motif. (a.k.a. RRM, RBD, or RNP domain);; RNA recognition motif. (a.k.a. RRM, RBD, or RNP domain)	Poly(U)-binding-splicing factor half pint GN=pUf68 OS=Drosophila melanogaster (Fruit fly) PE=1 SV=2	S	Function unknown	PREDICTED: splicing factor 45-like [Aplysia californica]
F01.PB19311	--	--	--	K08492|1.75912e-98|lgi:LOTGIDRAFT_117319|hypothetical protein; K08492 syntaxin 18 (A)	ko04130:SNARE interactions in vesicular transport;ko04145:Phagosome	[U]	Intracellular trafficking, secretion, and vesicular transport	SNARE-complex protein Syntaxin-18 N-terminus	--	U	Intracellular trafficking, secretion, and vesicular transport	hypothetical protein LOTGIDRAFT_117319 [Lottia gigantea]
F01.PB18734	--	--	Molecular Function: sequence-specific DNA binding (GO:0043565);;	K09319|1.41095e-29|lgi:LOTGIDRAFT_219971|hypothetical protein; K09319 homeobox protein engrailed (A)	--	[R]	General function prediction only	Homeobox domain;; Engrailed homeobox C-terminal signature domain	Segmentation polarity homeobox protein engrailed GN=en OS=Bombyx mori (Silk moth) PE=2 SV=1	K	Transcription	engrailed [Patella vulgata]
F01.PB15316	--	--	--	K06115|0|lgi:LOTGIDRAFT_139452|hypothetical protein; K06115 spectrin beta (A)	--	[Z]	Cytoskeleton	Spectrin repeat;; Pleckstrin homology domain;; PH domain	Spectrin beta chain GN=beta-Spec OS=Drosophila melanogaster (Fruit fly) PE=1 SV=2	Z	Cytoskeleton	PREDICTED: spectrin beta chain-like isoform X7 [Aplysia californica]
F01.PB11365	[R]	General function prediction only	Molecular Function: ion binding (GO:0043167);; Molecular Function: iron-sulfur cluster binding (GO:0051536);;	--	--	[R]	General function prediction only	Pyridine nucleotide-disulphide oxidoreductase;; Rieske [2Fe-2S] domain;; Rieske-like [2Fe-2S] domain;; Pyridine nucleotide-disulphide oxidoreductase;; Pyridine nucleotide-disulphide oxidoreductase;; Reductase C-terminal;; Pyridine nucleotide-disulphide oxidoreductase	Trypanothione reductase GN=TPR OS=Trypanosoma brucei brucei PE=1 SV=1	S	Function unknown	Apoptosis-inducing factor 3 [Crassostrea gigas]
F01.PB14340	--	--	--	--	--	--	--	--	--	--	--	hypothetical protein LOTGIDRAFT_233043 [Lottia gigantea]
F01.PB9270	[C]	Energy production and conversion	Biological Process: tricarboxylic acid cycle (GO:0006099);; Biological Process: malate metabolic process (GO:0006108);; Molecular Function: L-malate dehydrogenase activity (GO:0030060);; Biological Process: cellular carbohydrate metabolic process (GO:0044262);;	K00026|1.03857e-152|mgp:100544516|MDH2; malate dehydrogenase 2, NAD (mitochondrial); K00026 malate dehydrogenase [EC:1.1.1.37] (A)	ko00020:Citrate cycle (TCA cycle);ko00270:Cysteine and methionine metabolism;ko00620:Pyruvate metabolism;ko00630:Glyoxylate and dicarboxylate metabolism;ko01200:Carbon metabolism	[C]	Energy production and conversion	lactate/malate dehydrogenase, NAD binding domain;; lactate/malate dehydrogenase, alpha/beta C-terminal domain;; 3-beta hydroxysteroid dehydrogenase/isomerase family	Probable malate dehydrogenase, mitochondrial (Precursor) GN=mdh-2 OS=Caenorhabditis elegans PE=3 SV=1	C	Energy production and conversion	PREDICTED: malate dehydrogenase, mitochondrial-like isoform X2 [Aplysia californica]
F01.PB9884	--	--	Molecular Function: endopeptidase inhibitor activity (GO:0004866);; Cellular Component: extracellular space (GO:0005615);; Biological Process: negative regulation of endopeptidase activity (GO:0010951);;	K06530|1.91182e-171|bfo:BRAFLDRAFT_120995|hypothetical protein; K06530 CD109 antigen (A)	--	[O]	Posttranslational modification, protein turnover, chaperones	A-macroglobulin complement component;; A-macroglobulin receptor;; Alpha-macro-globulin thiol-ester bond-forming region;; Prenyltransferase-like;; Prenyltransferase-like;; MG2 domain	--	S	Function unknown	hypothetical protein CGI_10015501 [Crassostrea gigas]
F01.PB1410	--	--	Biological Process: ubiquitin-dependent protein catabolic process (GO:0006511);; Cellular Component: proteasome regulatory particle, base subcomplex (GO:0008540);;	K03029|1.11108e-150|cfr:102516967|PSMD4; proteasome (prosome, macropain) 26S subunit, non-ATPase, 4; K03029 26S proteasome regulatory subunit N10 (A)	ko03050:Proteasome;ko05169:Epstein-Barr virus infection	[O]	Posttranslational modification, protein turnover, chaperones	von Willebrand factor type A domain;; Ubiquitin interaction motif;; Ssl1-like	26S proteasome non-ATPase regulatory subunit 4 GN=Rpn10 OS=Drosophila melanogaster (Fruit fly) PE=1 SV=2	O	Posttranslational modification, protein turnover, chaperones	antisecretory factor-like protein [Pinctada fucata]
F01.PB14862	--	--	--	K13165|3.61782e-123|lgi:LOTGIDRAFT_121003|hypothetical protein; K13165 splicing factor, arginine/serine-rich 12 (A)	--	[A]	RNA processing and modification	RNA recognition motif. (a.k.a. RRM, RBD, or RNP domain);; RNA recognition motif (a.k.a. RRM, RBD, or RNP domain);; RNA recognition motif. (a.k.a. RRM, RBD, or RNP domain)	Probable splicing factor, arginine/serine-rich 7 GN=rsp-7 OS=Caenorhabditis elegans PE=3 SV=3	S	Function unknown	Putative splicing factor, arginine/serine-rich 7 [Crassostrea gigas]
F01.PB18233	[MG]	--	--	--	--	--	--	NADH(P)-binding;; NmrA-like family;; NAD dependent epimerase/dehydratase family	--	S	Function unknown	hypothetical protein LOTGIDRAFT_113739 [Lottia gigantea]
F01.PB19169	--	--	--	--	--	--	--	--	--	--	--	hypothetical protein CGI_10024155 [Crassostrea gigas]
F01.PB22339	--	--	--	--	--	[U]	Intracellular trafficking, secretion, and vesicular transport	Sec1 family	Vacuolar protein sorting-associated protein 33A GN=car OS=Drosophila melanogaster (Fruit fly) PE=1 SV=1	U	Intracellular trafficking, secretion, and vesicular transport	Vacuolar protein sorting-associated protein 33B [Crassostrea gigas]
F01.PB14330	--	--	Biological Process: termination of G-protein coupled receptor signaling pathway (GO:0038032);;	K16449|7.52696e-44|lgi:LOTGIDRAFT_132712|hypothetical protein; K16449 regulator of G-protein signaling (A)	--	[T]	Signal transduction mechanisms	Regulator of G protein signaling domain	Regulator of G-protein signaling rgs-1 GN=rgs-1 OS=Caenorhabditis elegans PE=2 SV=3	K	Transcription	Regulator of G-protein signaling 3 [Crassostrea gigas]
F01.PB3819	--	--	--	K17286|4.73347e-48|lgi:LOTGIDRAFT_214616|hypothetical protein; K17286 erythrocyte band 7 integral membrane protein (A)	--	[C]	Energy production and conversion	--	Stomatin-2 GN=sto-2 OS=Caenorhabditis elegans PE=3 SV=4	O	Posttranslational modification, protein turnover, chaperones	hypothetical protein CAPTEDRAFT_172853, partial [Capitella teleta]
F01.PB18816	--	--	--	--	--	[S]	Function unknown	Frag1/DRAM/Sfk1 family	--	S	Function unknown	hypothetical protein LOTGIDRAFT_217334 [Lottia gigantea]
F01.PB16250	[E]	Amino acid transport and metabolism	Molecular Function: 4-aminobutyrate transaminase activity (GO:0003867);; Cellular Component: mitochondrial matrix (GO:0005759);; Biological Process: cellular amino acid metabolic process (GO:0006520);;	K13524|0|dre:378968|abat, cb880, fj82a01, wu:fj82a01; 4-aminobutyrate aminotransferase (EC:2.6.1.19); K13524 4-aminobutyrate aminotransferase / (S)-3-amino-2-methylpropionate transaminase [EC:2.6.1.19 2.6.1.22] (A)	ko00250:Alanine, aspartate and glutamate metabolism;ko00280:Valine, leucine and isoleucine degradation;ko00410:beta-Alanine metabolism;ko00640:Propanoate metabolism;ko00650:Butanoate metabolism	[E]	Amino acid transport and metabolism	Aminotransferase class-III	4-aminobutyrate aminotransferase GN=gabT OS=Dictyostelium discoideum (Slime mold) PE=3 SV=1	E	Amino acid transport and metabolism	4-aminobutyrate aminotransferase, mitochondrial [Crassostrea gigas]
F01.PB6527	--	--	Biological Process: single-organism process (GO:0044699);;	K16506|4.90978e-13|lcm:102355232|FAT1; FAT atypical cadherin 1; K16506 protocadherin Fat 1/2/3 (A)	--	[T]	Signal transduction mechanisms	EGF-like domain;; EGF-like domain;; Human growth factor-like EGF	Processed neurogenic locus Notch protein (Precursor) GN=N OS=Drosophila melanogaster (Fruit fly) PE=1 SV=3	S	Function unknown	hypothetical protein CGI_10028487 [Crassostrea gigas]
F01.PB7966	--	--	--	--	--	--	--	Domain of unknown function (DUF4535)	--	S	Function unknown	PREDICTED: uncharacterized protein LOC105227403 isoform X2 [Bactrocera dorsalis]
F01.PB17197	--	--	Biological Process: protein folding (GO:0006457);; Cellular Component: prefoldin complex (GO:0016272);; Molecular Function: unfolded protein binding (GO:0051082);;	--	--	[O]	Posttranslational modification, protein turnover, chaperones	Prefoldin subunit	Prefoldin subunit 3 GN=mgr OS=Drosophila melanogaster (Fruit fly) PE=1 SV=3	S	Function unknown	hypothetical protein LOTGIDRAFT_202995 [Lottia gigantea]
F01.PB5170	[C]	Energy production and conversion	Molecular Function: cytochrome-c oxidase activity (GO:0004129);; Molecular Function: iron ion binding (GO:0005506);; Cellular Component: mitochondrial inner membrane (GO:0005743);; Biological Process: oxidative phosphorylation (GO:0006119);; Molecular Function: electron carrier activity (GO:0009055);; Biological Process: aerobic respiration (GO:0009060);; Cellular Component: integral component of…	K02256|1.53734e-87|tca:803829|COX1; cytochrome c oxidase subunit I; K02256 cytochrome c oxidase subunit 1 [EC:1.9.3.1] (A)	ko00190:Oxidative phosphorylation	[C]	Energy production and conversion	--	Cytochrome c oxidase subunit 1 GN=COI OS=Lumbricus terrestris (Common earthworm) PE=3 SV=1	C	Energy production and conversion	cytochrome c oxidase subunit I (mitochondrion) [Doryteuthis opalescens]
F01.PB14060	[T]	Signal transduction mechanisms	Molecular Function: magnesium ion binding (GO:0000287);; Molecular Function: protein serine/threonine phosphatase activity (GO:0004722);; Biological Process: protein dephosphorylation (GO:0006470);; Molecular Function: manganese ion binding (GO:0030145);;	K04461|1.80988e-145|lgi:LOTGIDRAFT_194163|hypothetical protein; K04461 protein phosphatase 1B [EC:3.1.3.16] (A)	--	[T]	Signal transduction mechanisms	Protein phosphatase 2C;; Protein serine/threonine phosphatase 2C, C-terminal domain;; Protein phosphatase 2C	Probable protein phosphatase 2C T23F11.1 GN=ppm-2 OS=Caenorhabditis elegans PE=3 SV=2	T	Signal transduction mechanisms	Protein phosphatase 1B [Crassostrea gigas]
F01.PB17368	--	--	--	--	--	--	--	--	Countin-1 (Precursor) GN=ctnA OS=Dictyostelium discoideum (Slime mold) PE=1 SV=1	S	Function unknown	Countin-1 [Crassostrea gigas]
F01.PB11963	[K]	Transcription	--	K12620|9.21653e-41|spu:100889424|U6 snRNA-associated Sm-like protein LSm1-like; K12620 U6 snRNA-associated Sm-like protein LSm1 (A)	ko03018:RNA degradation	[A]	RNA processing and modification	LSM domain	Probable U6 snRNA-associated Sm-like protein LSm1 GN=lsm1 OS=Dictyostelium discoideum (Slime mold) PE=3 SV=1	K	Transcription	U6 snRNA-associated Sm-like protein LSm1 [Crassostrea gigas]
F01.PB21002	--	--	Molecular Function: signal transducer activity (GO:0004871);; Biological Process: signal transduction (GO:0007165);;	--	--	[PT]	--	Receptor family ligand binding region;; Periplasmic binding protein	Metabotropic glutamate receptor-like protein E (Precursor) GN=grlE OS=Dictyostelium discoideum (Slime mold) PE=2 SV=2	U	Intracellular trafficking, secretion, and vesicular transport	Metabotropic glutamate receptor 7 [Crassostrea gigas]
F01.PB14750	[S]	Function unknown	Cellular Component: integral component of membrane (GO:0016021);;	--	--	[S]	Function unknown	--	Transmembrane protein 41 homolog GN=stas OS=Drosophila melanogaster (Fruit fly) PE=2 SV=2	S	Function unknown	Transmembrane protein 41B, partial [Crassostrea gigas]
F01.PB8845	--	--	--	K12189|3.00992e-71|lgi:LOTGIDRAFT_226114|hypothetical protein; K12189 ESCRT-II complex subunit VPS25 (A)	ko04144:Endocytosis	[S]	Function unknown	ESCRT-II complex subunit;; Cilia BBSome complex subunit 10	Vacuolar protein-sorting-associated protein 25 GN=Vps25 OS=Drosophila melanogaster (Fruit fly) PE=2 SV=1	U	Intracellular trafficking, secretion, and vesicular transport	Vacuolar protein-sorting-associated protein 25 [Crassostrea gigas]
F01.PB15787	--	--	--	--	--	--	--	PMP-22/EMP/MP20/Claudin family	--	--	--	--
F01.PB7367	--	--	Biological Process: metal ion transport (GO:0030001);; Molecular Function: metal ion binding (GO:0046872);;	K07213|2.96525e-15|nvi:100116647|copper transport protein ATOX1; K07213 copper chaperone (A)	--	[P]	Inorganic ion transport and metabolism	Heavy-metal-associated domain	--	S	Function unknown	PREDICTED: copper transport protein ATOX1 [Nasonia vitripennis]
F01.PB2018	--	--	--	--	--	--	--	--	--	S	Function unknown	PREDICTED: transmembrane protein 177 [Harpegnathos saltator]
F01.PB7841	[R]	General function prediction only	Molecular Function: ion binding (GO:0043167);; Molecular Function: iron-sulfur cluster binding (GO:0051536);;	--	--	[R]	General function prediction only	Pyridine nucleotide-disulphide oxidoreductase;; Pyridine nucleotide-disulphide oxidoreductase;; Rieske [2Fe-2S] domain;; Pyridine nucleotide-disulphide oxidoreductase;; Rieske-like [2Fe-2S] domain;; Reductase C-terminal;; FAD dependent oxidoreductase;; HI0933-like protein;; NAD(P)-binding Rossmann-like domain;; FAD binding domain;; L-lysine 6-monooxygenase (NADPH-requiring)	Apoptosis-inducing factor 1, mitochondrial (Precursor) GN=aif OS=Dictyostelium discoideum (Slime mold) PE=2 SV=1	S	Function unknown	Apoptosis-inducing factor 3 [Crassostrea gigas]
F01.PB19022	--	--	--	--	--	[O]	Posttranslational modification, protein turnover, chaperones	--	--	O	Posttranslational modification, protein turnover, chaperones	Heat shock 70 kDa protein 12B [Crassostrea gigas]
F01.PB6810	--	--	--	--	--	--	--	--	--	S	Function unknown	PREDICTED: uncharacterized protein LOC101851895 isoform X2 [Aplysia californica]
F01.PB17544	--	--	--	--	--	--	--	Sulfotransferase domain	--	U	Intracellular trafficking, secretion, and vesicular transport	PREDICTED: carbohydrate sulfotransferase 1-like [Aplysia californica]
F01.PB17190	--	--	--	--	--	[P]	Inorganic ion transport and metabolism	EF hand	Calcium uptake protein 1 homolog, mitochondrial GN=Y67H2A.4 OS=Caenorhabditis elegans PE=3 SV=2	S	Function unknown	hypothetical protein LOTGIDRAFT_230996 [Lottia gigantea]
F01.PB17638	--	--	Molecular Function: sequence-specific DNA binding transcription factor activity (GO:0003700);; Cellular Component: nucleus (GO:0005634);; Biological Process: regulation of transcription, DNA-templated (GO:0006355);; Molecular Function: protein dimerization activity (GO:0046983);;	K04453|1.71484e-44|api:100164512|bhlhzip transcription factor max/bigmax-like; K04453 Max protein (A)	--	[K]	Transcription	Helix-loop-helix DNA-binding domain	Protein max GN=Max OS=Drosophila melanogaster (Fruit fly) PE=1 SV=1	K	Transcription	Protein max [Crassostrea gigas]
F01.PB5567	--	--	--	--	--	[W]	Extracellular structures	Collagen triple helix repeat (20 copies)	Collagen alpha-1(IV) chain (Precursor) GN=Cg25C OS=Drosophila melanogaster (Fruit fly) PE=2 SV=3	S	Function unknown	type VI-related collagen, partial [Drosophila melanogaster]
F01.PB12100	--	--	--	K08882|6.23443e-12|acs:100565388|trim28; tripartite motif containing 28; K08882 tripartite motif-containing protein 28 [EC:6.3.2.19] (A)	--	[O]	Posttranslational modification, protein turnover, chaperones	B-box zinc finger	--	B	Chromatin structure and dynamics	Tripartite motif-containing protein 56 [Crassostrea gigas]
F01.PB10576	--	--	--	--	--	[T]	Signal transduction mechanisms	Protein-tyrosine phosphatase	Tyrosine-protein phosphatase 1 GN=ptp-1 OS=Caenorhabditis elegans PE=2 SV=3	T	Signal transduction mechanisms	Receptor-type tyrosine-protein phosphatase kappa [Crassostrea gigas]
F01.PB17247	--	--	--	--	--	--	--	Mab-21 protein	--	O	Posttranslational modification, protein turnover, chaperones	hypothetical protein CAPTEDRAFT_224084 [Capitella teleta]
F01.PB10745	--	--	Molecular Function: oxidoreductase activity (GO:0016491);;	K00472|3.12153e-67|mcf:101925842|hypothetical protein; K00472 prolyl 4-hydroxylase [EC:1.14.11.2] (A)	ko00330:Arginine and proline metabolism	[E]	Amino acid transport and metabolism	Prolyl 4-Hydroxylase alpha-subunit, N-terminal region	Prolyl 4-hydroxylase subunit alpha-1 (Precursor) GN=dpy-18 OS=Caenorhabditis elegans PE=1 SV=2	S	Function unknown	Prolyl 4-hydroxylase subunit alpha-1 [Crassostrea gigas]
F01.PB3368	--	--	Biological Process: neurogenesis (GO:0022008);;	K13119|1.61716e-126|lgi:LOTGIDRAFT_222603|hypothetical protein; K13119 protein FAM50 (A)	--	[S]	Function unknown	XAP5, circadian clock regulator	Protein FAM50 homolog GN=CG12259 OS=Drosophila melanogaster (Fruit fly) PE=2 SV=1	S	Function unknown	FAM50-like protein [Crassostrea gigas]
F01.PB19977	[R]	General function prediction only	--	K10693|6.98185e-91|ame:551203|probable E3 ubiquitin-protein ligase MYCBP2-like; K10693 E3 ubiquitin-protein ligase MYCBP2 [EC:6.3.2.19] (A)	--	[T]	Signal transduction mechanisms	Macro domain;; Ring finger domain	E3 ubiquitin-protein ligase highwire OS=Drosophila melanogaster (Fruit fly) PE=1 SV=2	O	Posttranslational modification, protein turnover, chaperones	PREDICTED: LOW QUALITY PROTEIN: probable E3 ubiquitin-protein ligase MYCBP2-like [Apis mellifera]
F01.PB11515	--	--	--	--	--	--	--	Domain of unknown function (DUF4483)	--	S	Function unknown	hypothetical protein CGI_10008521 [Crassostrea gigas]
F01.PB13594	--	--	--	K12804|2.7884e-48|lgi:LOTGIDRAFT_105043|hypothetical protein; K12804 proline-serine-threonine phosphatase interacting protein 1 (A)	--	[D]	Cell cycle control, cell division, chromosome partitioning	Fes/CIP4, and EFC/F-BAR homology domain	--	T	Signal transduction mechanisms	hypothetical protein LOTGIDRAFT_105043 [Lottia gigantea]
F01.PB14232	--	--	--	--	--	--	--	--	--	S	Function unknown	hypothetical protein CGI_10014552 [Crassostrea gigas]
F01.PB11310	--	--	--	--	--	--	--	--	--	--	--	hypothetical protein LOTGIDRAFT_154629 [Lottia gigantea]
F01.PB20757	--	--	Molecular Function: aspartic-type endopeptidase activity (GO:0004190);; Biological Process: proteolysis (GO:0006508);;	K01379|4.16527e-67|xtr:493534|MGC89016 protein; K01379 cathepsin D [EC:3.4.23.5] (A)	ko04142:Lysosome	[O]	Posttranslational modification, protein turnover, chaperones	Eukaryotic aspartyl protease;; Xylanase inhibitor N-terminal;; Aspartyl protease	Lysosomal aspartic protease (Precursor) GN=AAEL006169 OS=Aedes aegypti (Yellowfever mosquito) PE=1 SV=2	O	Posttranslational modification, protein turnover, chaperones	cathepsin D [Pinctada maxima]
F01.PB5392	[R]	General function prediction only	--	--	--	[OR]	--	Peptidase family M28	--	S	Function unknown	PREDICTED: uncharacterized protein LOC100378460 [Saccoglossus kowalevskii]
F01.PB12477	[R]	General function prediction only	Molecular Function: GTPase activity (GO:0003924);; Molecular Function: GTP binding (GO:0005525);; Biological Process: GTP catabolic process (GO:0006184);; Biological Process: small GTPase mediated signal transduction (GO:0007264);; Biological Process: epidermis development (GO:0008544);; Cellular Component: membrane (GO:0016020);; Biological Process: collagen and cuticulin-based cuticle developme…	K04353|8.31704e-91|hro:HELRODRAFT_77994|hypothetical protein; K04353 Ras-related protein Rap-1A (A)	--	[R]	General function prediction only	Ras family;; Miro-like protein;; ADP-ribosylation factor family;; Elongation factor Tu GTP binding domain;; 50S ribosome-binding GTPase	Ras-related protein Rap-1 GN=rap-1 OS=Caenorhabditis elegans PE=3 SV=1	S	Function unknown	ras-related protein rap-1b [Ascaris suum]
F01.PB17043	--	--	--	--	--	--	--	--	--	S	Function unknown	hypothetical protein X777_10005, partial [Cerapachys biroi]
F01.PB14147	--	--	--	--	--	--	--	--	--	--	--	RNA-binding protein 9 [Crassostrea gigas]
F01.PB8376	--	--	Biological Process: neurogenesis (GO:0022008);;	K17421|1.80504e-28|aag:AaeL_AAEL007762|mitochondrial ribosomal protein, L40, putative; K17421 large subunit ribosomal protein L40 (A)	--	[J]	Translation, ribosomal structure and biogenesis	Mitochondrial ribosomal protein L28	--	S	Function unknown	mitochondrial ribosomal protein, L40, putative [Aedes aegypti]
F01.PB4662	--	--	--	K06238|1.11141e-21|lgi:LOTGIDRAFT_234764|hypothetical protein; K06238 collagen, type VI, alpha (A)	ko04512:ECM-receptor interaction	[T]	Signal transduction mechanisms	von Willebrand factor type A domain;; von Willebrand factor type A domain	Fibropellin-3 (Precursor) GN=EGF3 OS=Strongylocentrotus purpuratus (Purple sea urchin) PE=1 SV=1	S	Function unknown	Fibropellin-3, partial [Crassostrea gigas]
F01.PB13444	[R]	General function prediction only	--	--	--	--	--	WD domain, G-beta repeat	77 kDa echinoderm microtubule-associated protein (Fragment) GN=EMAP OS=Lytechinus variegatus (Green sea urchin) PE=2 SV=1	S	Function unknown	PREDICTED: WD repeat-containing protein 65-like [Aplysia californica]
F01.PB3502	[R]	General function prediction only	Molecular Function: transferase activity (GO:0016740);;	--	--	[R]	General function prediction only	WD domain, G-beta repeat	WD repeat-containing protein 55 homolog GN=AAEL006422 OS=Aedes aegypti (Yellowfever mosquito) PE=3 SV=1	S	Function unknown	WD repeat-containing protein 55, partial [Crassostrea gigas]
F01.PB16467	--	--	--	--	--	[S]	Function unknown	--	Protocadherin-like protein {ECO:0000303|PubMed:23765379} (Precursor) OS=Acropora millepora (Staghorn coral) PE=1 SV=1	U	Intracellular trafficking, secretion, and vesicular transport	Cadherin-23 [Crassostrea gigas]
F01.PB7230	--	--	--	K12026|8.66735e-26|bfo:BRAFLDRAFT_104271|hypothetical protein; K12026 tripartite motif-containing protein 56 [EC:6.3.2.19] (A)	--	[O]	Posttranslational modification, protein turnover, chaperones	B-box zinc finger;; Zinc finger, C3HC4 type (RING finger);; NHL repeat	RING finger protein nhl-1 GN=nhl-1 OS=Caenorhabditis elegans PE=1 SV=2	S	Function unknown	Tripartite motif-containing protein 56 [Crassostrea gigas]
F01.PB11530	--	--	Cellular Component: integral component of membrane (GO:0016021);; Biological Process: transmembrane transport (GO:0055085);;	K15109|9.60856e-123|isc:IscW_ISCW022609|carnitine-acylcarnitine carrier protein, putative; K15109 solute carrier family 25 (mitochondrial carnitine/acylcarnitine transporter), member 20/29 (A)	--	[C]	Energy production and conversion	Mitochondrial carrier protein;; Mitochondrial carrier protein	Protein dif-1 GN=dif-1 OS=Caenorhabditis elegans PE=2 SV=1	S	Function unknown	carnitine-acylcarnitine carrier protein, putative [Ixodes scapularis]
F01.PB16521	[TZDR]	--	--	K02183|1.23545e-31|hro:HELRODRAFT_110019|hypothetical protein; K02183 calmodulin (A)	ko04070:Phosphatidylinositol signaling system	[T]	Signal transduction mechanisms	EF-hand domain pair;; EF hand;; EF-hand domain pair;; EF-hand domain	Calmodulin OS=Suberites domuncula (Sponge) PE=2 SV=3	DTZ	--	hypothetical protein HELRODRAFT_110019 [Helobdella robusta]
F01.PB5332	--	--	--	--	--	--	--	--	Feeding circuit activating peptide h (Precursor) OS=Aplysia californica (California sea hare) PE=1 SV=1	--	--	hypothetical protein LOTGIDRAFT_116754 [Lottia gigantea]
F01.PB12487	--	--	--	K12462|1.4378e-49|dpo:Dpse_GA20609|GA20609 gene product from transcript GA20609-RA; K12462 Rho GDP-dissociation inhibitor (A)	--	[T]	Signal transduction mechanisms	RHO protein GDP dissociation inhibitor	Probable rho GDP-dissociation inhibitor GN=rhi-1 OS=Caenorhabditis elegans PE=3 SV=1	O	Posttranslational modification, protein turnover, chaperones	GA20609 [Drosophila pseudoobscura pseudoobscura]
F01.PB6070	--	--	--	--	--	--	--	--	--	S	Function unknown	hypothetical protein CGI_10012092 [Crassostrea gigas]
F01.PB8027	--	--	--	--	--	[G]	Carbohydrate transport and metabolism	Major Facilitator Superfamily	--	G	Carbohydrate transport and metabolism	Monocarboxylate transporter 12 [Crassostrea gigas]
F01.PB8349	--	--	--	--	--	--	--	--	--	--	--	hypothetical protein CGI_10004021 [Crassostrea gigas]
F01.PB22574	--	--	--	K14443|9.54712e-37|fpg:101913881|BTG2; BTG family, member 2; K14443 protein Tob/BTG (A)	ko03018:RNA degradation	[TR]	--	BTG family	EGF-like domain-containing protein 2 (Precursor) OS=Pinctada maxima (Silver-lipped pearl oyster) PE=1 SV=1	S	Function unknown	BTG1 [Hyriopsis schlegelii]
F01.PB16332	--	--	--	K18343|4.42322e-74|lgi:LOTGIDRAFT_115152|hypothetical protein; K18343 ubiquitin thioesterase otulin [EC:3.4.19.12] (A)	--	--	--	--	--	O	Posttranslational modification, protein turnover, chaperones	hypothetical protein CGI_10012613 [Crassostrea gigas]
F01.PB1973	--	--	--	--	--	--	--	--	--	--	--	hypothetical protein CGI_10000793 [Crassostrea gigas]
F01.PB11259	[Q]	Secondary metabolites biosynthesis, transport and catabolism	--	--	--	[QI]	--	Cytochrome P450	Probable cytochrome P450 4s3 GN=Cyp4s3 OS=Drosophila melanogaster (Fruit fly) PE=3 SV=1	Q	Secondary metabolites biosynthesis, transport and catabolism	Leukotriene-B(4) omega-hydroxylase 1 [Crassostrea gigas]
F01.PB511	--	--	--	--	--	--	--	--	--	--	--	hypothetical protein CGI_10015671 [Crassostrea gigas]
F01.PB10689	--	--	--	--	--	--	--	Protein of unknown function (DUF229);; Protein of unknown function (DUF229)	--	S	Function unknown	hypothetical protein BRAFLDRAFT_222659 [Branchiostoma floridae]
F01.PB3079	--	--	--	K03137|1.24515e-93|lgi:LOTGIDRAFT_127089|hypothetical protein; K03137 transcription initiation factor TFIIE subunit beta (A)	ko03022:Basal transcription factors	[K]	Transcription	TFIIE beta subunit core domain	--	K	Transcription	Transcription initiation factor IIE subunit beta [Crassostrea gigas]
F01.PB2537	--	--	--	--	--	--	--	--	--	S	Function unknown	hypothetical protein CGI_10002889 [Crassostrea gigas]
F01.PB6300	[S]	Function unknown	Biological Process: metabolic process (GO:0008152);; Molecular Function: carbon-sulfur lyase activity (GO:0016846);;	--	--	[S]	Function unknown	Glutathione-dependent formaldehyde-activating enzyme	--	S	Function unknown	hypothetical protein CAPTEDRAFT_171327 [Capitella teleta]
F01.PB5541	[O]	Posttranslational modification, protein turnover, chaperones	Molecular Function: isomerase activity (GO:0016853);; Biological Process: cellular protein metabolic process (GO:0044267);;	K12739|1.69682e-148|lgi:LOTGIDRAFT_195649|hypothetical protein; K12739 peptidyl-prolyl cis-trans isomerase-like 6 [EC:5.2.1.8] (A)	--	[O]	Posttranslational modification, protein turnover, chaperones	Cyclophilin type peptidyl-prolyl cis-trans isomerase/CLD	Peptidyl-prolyl cis-trans isomerase D, mitochondrial GN=cypD OS=Dictyostelium discoideum (Slime mold) PE=1 SV=1	O	Posttranslational modification, protein turnover, chaperones	hypothetical protein LOTGIDRAFT_195649 [Lottia gigantea]
F01.PB15512	--	--	Molecular Function: zinc ion binding (GO:0008270);;	--	--	[Z]	Cytoskeleton	SH3 domain;; Variant SH3 domain;; Nebulin repeat;; LIM domain	LIM and SH3 domain protein F42H10.3 GN=F42H10.3 OS=Caenorhabditis elegans PE=3 SV=3	S	Function unknown	PREDICTED: LIM and SH3 domain protein Lasp [Harpegnathos saltator]
F01.PB20297	--	--	Cellular Component: plasma membrane (GO:0005886);; Biological Process: signal transduction (GO:0007165);;	K04543|7.20277e-23|hro:HELRODRAFT_73501|hypothetical protein; K04543 guanine nucleotide-binding protein G(I)/G(S)/G(O) subunit gamma-7 (A)	--	[Z]	Cytoskeleton	GGL domain	Guanine nucleotide-binding protein subunit gamma-1 (Precursor) GN=Ggamma1 OS=Drosophila melanogaster (Fruit fly) PE=2 SV=1	T	Signal transduction mechanisms	Guanine nucleotide-binding protein subunit gamma-1 [Crassostrea gigas]
F01.PB21938	--	--	--	--	--	--	--	Destabilase	Lysozyme {ECO:0000303|Ref.1} OS=Meretrix lusoria (Hard clam) PE=1 SV=1	--	--	lysozyme [Mactra quadrangularis]
F01.PB11234	--	--	--	K17353|1.72575e-12|spu:751836|tetraspanin; K17353 tetraspanin-18 (A)	--	[R]	General function prediction only	Tetraspanin family	--	S	Function unknown	CD63 antigen [Crassostrea gigas]
F01.PB6342	--	--	--	--	--	[T]	Signal transduction mechanisms	HYR domain;; EGF-like domain	Protein serrate (Precursor) GN=Ser OS=Drosophila melanogaster (Fruit fly) PE=1 SV=3	--	--	Sushi repeat-containing protein SRPX2 [Crassostrea gigas]
F01.PB146	--	--	--	--	--	[S]	Function unknown	Uncharacterized conserved protein (DUF2039)	--	S	Function unknown	PREDICTED: uncharacterized protein C9orf85 homolog isoform X2 [Tribolium castaneum]
F01.PB10548	[C]	Energy production and conversion	--	K01596|2.40687e-126|lgi:LOTGIDRAFT_203707|hypothetical protein; K01596 phosphoenolpyruvate carboxykinase (GTP) [EC:4.1.1.32] (A)	ko00010:Glycolysis / Gluconeogenesis;ko00020:Citrate cycle (TCA cycle);ko00620:Pyruvate metabolism;ko04068:FoxO signaling pathway	[C]	Energy production and conversion	Phosphoenolpyruvate carboxykinase;; Phosphoenolpyruvate carboxykinase;; Phosphoenolpyruvate carboxykinase	Phosphoenolpyruvate carboxykinase [GTP] GN=PEPCK OS=Haemonchus contortus (Barber pole worm) PE=2 SV=1	C	Energy production and conversion	phosphoenolpyruvate carboxykinase [Ascaris suum]
F01.PB11230	--	--	--	--	--	--	--	--	--	--	--	hypothetical protein CGI_10026724 [Crassostrea gigas]
F01.PB12371	[C]	Energy production and conversion	Molecular Function: phosphoenolpyruvate carboxykinase (GTP) activity (GO:0004613);; Molecular Function: GTP binding (GO:0005525);; Biological Process: gluconeogenesis (GO:0006094);; Molecular Function: kinase activity (GO:0016301);; Biological Process: phosphorylation (GO:0016310);;	K01596|0|lgi:LOTGIDRAFT_178121|hypothetical protein; K01596 phosphoenolpyruvate carboxykinase (GTP) [EC:4.1.1.32] (A)	ko00010:Glycolysis / Gluconeogenesis;ko00020:Citrate cycle (TCA cycle);ko00620:Pyruvate metabolism;ko04068:FoxO signaling pathway	[C]	Energy production and conversion	Phosphoenolpyruvate carboxykinase	Phosphoenolpyruvate carboxykinase [GTP] GN=Pepck OS=Drosophila melanogaster (Fruit fly) PE=2 SV=2	C	Energy production and conversion	Phosphoenolpyruvate carboxykinase, cytosolic [GTP] [Crassostrea gigas]
F01.PB21108	[RTKL]	--	Molecular Function: nucleotide binding (GO:0000166);; Molecular Function: protein kinase activity (GO:0004672);; Biological Process: phosphorylation (GO:0016310);;	K04420|7.33349e-147|bfo:BRAFLDRAFT_221293|hypothetical protein; K04420 mitogen-activated protein kinase kinase kinase 2 [EC:2.7.11.25] (A)	--	[T]	Signal transduction mechanisms	Protein kinase domain;; Protein tyrosine kinase;; PB1 domain	Mitogen-activated protein kinase kinase kinase A {ECO:0000303|PubMed:9832508} OS=Dictyostelium discoideum (Slime mold) PE=1 SV=2	T	Signal transduction mechanisms	hypothetical protein BRAFLDRAFT_221293 [Branchiostoma floridae]
F01.PB4659	--	--	--	--	--	--	--	--	--	--	--	hypothetical protein CGI_10016337 [Crassostrea gigas]
F01.PB1073	--	--	--	--	--	--	--	Fasciclin domain	--	M	Cell wall/membrane/envelope biogenesis	fasciclin, putative [Ixodes scapularis]
F01.PB76	--	--	--	--	--	[R]	General function prediction only	Fibrinogen beta and gamma chains, C-terminal globular domain	Protein scabrous (Precursor) GN=sca OS=Drosophila melanogaster (Fruit fly) PE=2 SV=3	S	Function unknown	PREDICTED: angiopoietin-related protein 6-like [Aplysia californica]
F01.PB3111	--	--	--	--	--	[R]	General function prediction only	Fibrinogen beta and gamma chains, C-terminal globular domain	Fibrinogen-like protein A (Precursor) OS=Parastichopus parvimensis (Warty sea cucumber) PE=2 SV=1	S	Function unknown	Fibrinogen C domain-containing protein 1 [Crassostrea gigas]
F01.PB21729	--	--	--	K10630|2.70594e-13|lcm:102349730|ranBP-type and C3HC4-type zinc finger-containing protein 1-like; K10630 RanBP-type and C3HC4-type zinc finger-containing protein 1 (A)	--	[O]	Posttranslational modification, protein turnover, chaperones	Zn-finger in Ran binding protein and others	--	O	Posttranslational modification, protein turnover, chaperones	PREDICTED: ranBP-type and C3HC4-type zinc finger-containing protein 1-like [Aplysia californica]
F01.PB1398	[O]	Posttranslational modification, protein turnover, chaperones	Cellular Component: membrane (GO:0016020);;	--	--	[C]	Energy production and conversion	SPFH domain / Band 7 family	Stomatin-1 GN=sto-1 OS=Caenorhabditis elegans PE=3 SV=2	O	Posttranslational modification, protein turnover, chaperones	PREDICTED: stomatin-like protein 2, mitochondrial-like isoform X1 [Aplysia californica]
F01.PB2386	--	--	--	K14322|1.33322e-14|bfo:BRAFLDRAFT_70532|hypothetical protein; K14322 polyadenylate-binding protein-interacting protein 1 (A)	ko03013:RNA transport	--	--	--	--	S	Function unknown	Polyadenylate-binding protein-interacting protein 1 [Crassostrea gigas]
F01.PB5516	--	--	--	--	--	[S]	Function unknown	Protein of unknown function (DUF974)	Probable trafficking protein particle complex subunit 13 homolog GN=C56C10.7 OS=Caenorhabditis elegans PE=3 SV=1	S	Function unknown	UPF0533 protein C5orf44-like protein [Crassostrea gigas]
F01.PB10141	[O]	Posttranslational modification, protein turnover, chaperones	--	--	--	[O]	Posttranslational modification, protein turnover, chaperones	Hsp70 protein	Heat shock protein 70 OS=Ceratitis capitata (Mediterranean fruit fly) PE=2 SV=1	O	Posttranslational modification, protein turnover, chaperones	Heat shock 70 kDa protein 12B [Crassostrea gigas]
F01.PB1752	--	--	Molecular Function: binding (GO:0005488);;	K12819|0|lgi:LOTGIDRAFT_124539|hypothetical protein; K12819 pre-mRNA-processing factor SLU7 (A)	ko03040:Spliceosome	[A]	RNA processing and modification	Pre-mRNA splicing Prp18-interacting factor	Pre-mRNA-splicing factor Slu7 GN=Slu7 OS=Drosophila melanogaster (Fruit fly) PE=1 SV=2	A	RNA processing and modification	Pre-mRNA-splicing factor SLU7 [Crassostrea gigas]
F01.PB1079	--	--	Cellular Component: mitochondrion (GO:0005739);; Cellular Component: membrane (GO:0016020);;	K02266|2.29445e-12|aga:AgaP_AGAP000851|AGAP000851-PA; K02266 cytochrome c oxidase subunit 6a (A)	ko00190:Oxidative phosphorylation	[C]	Energy production and conversion	Cytochrome c oxidase subunit VIa	--	O	Posttranslational modification, protein turnover, chaperones	AGAP000851-PA-like protein [Anopheles sinensis]
F01.PB19229	--	--	--	K10461|9.79491e-15|lgi:LOTGIDRAFT_190348|hypothetical protein; K10461 kelch-like protein 24/35 (A)	--	[TR]	--	Kelch motif;; Kelch motif;; Galactose oxidase, central domain;; Kelch motif;; Galactose oxidase, central domain;; Kelch motif	Kelch-like protein diablo {ECO:0000250|UniProtKB:Q9VUU5} OS=Drosophila pseudoobscura pseudoobscura (Fruit fly) PE=3 SV=2	S	Function unknown	Kelch-like protein 24 [Crassostrea gigas]
F01.PB21996	--	--	--	--	--	--	--	--	--	S	Function unknown	hypothetical protein CGI_10023564 [Crassostrea gigas]
F01.PB6988	--	--	--	--	--	--	--	YhhN-like protein	--	--	--	Transmembrane protein 86A [Crassostrea gigas]
F01.PB8665	[G]	Carbohydrate transport and metabolism	Molecular Function: hydrolase activity, hydrolyzing O-glycosyl compounds (GO:0004553);; Biological Process: metabolic process (GO:0008152);;	K12373|1.28502e-172|lgi:LOTGIDRAFT_120422|hypothetical protein; K12373 hexosaminidase [EC:3.2.1.52] (A)	ko00511:Other glycan degradation;ko00520:Amino sugar and nucleotide sugar metabolism;ko00531:Glycosaminoglycan degradation;ko00603:Glycosphingolipid biosynthesis - globo series;ko00604:Glycosphingolipid biosynthesis - ganglio series;ko04142:Lysosome	[G]	Carbohydrate transport and metabolism	Glycosyl hydrolase family 20, catalytic domain;; beta-acetyl hexosaminidase like;; Glycosyl hydrolase family 20, catalytic domain	Beta-hexosaminidase A (Precursor) GN=hex-1 OS=Caenorhabditis elegans PE=1 SV=1	G	Carbohydrate transport and metabolism	hypothetical protein LOTGIDRAFT_120422 [Lottia gigantea]
F01.PB13943	--	--	Molecular Function: motor activity (GO:0003774);; Cellular Component: myofibril (GO:0030016);; Cellular Component: myosin filament (GO:0032982);;	--	--	[Z]	Cytoskeleton	Myosin tail;; Intermediate filament protein;; Afadin- and alpha -actinin-Binding;; Myosin tail	Paramyosin OS=Mytilus galloprovincialis (Mediterranean mussel) PE=2 SV=1	Z	Cytoskeleton	Paramyosin [Crassostrea gigas]
F01.PB2166	--	--	--	--	--	--	--	--	--	S	Function unknown	hypothetical protein LOTGIDRAFT_111605 [Lottia gigantea]
F01.PB5288	[Q]	Secondary metabolites biosynthesis, transport and catabolism	Molecular Function: catalytic activity (GO:0003824);;	--	--	[Q]	Secondary metabolites biosynthesis, transport and catabolism	Cytochrome P450;; Cytochrome P450	Cytochrome P450 18a1 GN=Cyp18a1 OS=Drosophila melanogaster (Fruit fly) PE=2 SV=2	Q	Secondary metabolites biosynthesis, transport and catabolism	Steroid 17-alpha-hydroxylase/17,20 lyase [Crassostrea gigas]
F01.PB10013	--	--	Biological Process: neurogenesis (GO:0022008);;	--	--	[R]	General function prediction only	Ras family;; Miro-like protein	Ras-like protein rasS (Precursor) GN=rasS OS=Dictyostelium discoideum (Slime mold) PE=2 SV=1	S	Function unknown	Ras-related and estrogen-regulated growth inhibitor [Crassostrea gigas]
F01.PB15363	[O]	Posttranslational modification, protein turnover, chaperones	--	--	--	[O]	Posttranslational modification, protein turnover, chaperones	Hsp70 protein	Heat shock 70 kDa protein C (Precursor) GN=hsp-3 OS=Caenorhabditis briggsae PE=3 SV=2	O	Posttranslational modification, protein turnover, chaperones	Heat shock 70 kDa protein 12A [Crassostrea gigas]
F01.PB19663	[O]	Posttranslational modification, protein turnover, chaperones	--	--	--	[O]	Posttranslational modification, protein turnover, chaperones	Hsp70 protein	Heat shock 70 kDa protein D (Precursor) GN=hsp-4 OS=Caenorhabditis elegans PE=1 SV=2	O	Posttranslational modification, protein turnover, chaperones	Heat shock 70 kDa protein 12A [Crassostrea gigas]
F01.PB3176	[CP]	--	Cellular Component: mitochondrial inner membrane (GO:0005743);; Molecular Function: NADH dehydrogenase (ubiquinone) activity (GO:0008137);; Cellular Component: integral component of membrane (GO:0016021);; Biological Process: ATP synthesis coupled electron transport (GO:0042773);; Cellular Component: respiratory chain (GO:0070469);;	K03883|1.51728e-49|tca:803820|ND5; NADH dehydrogenase subunit 5; K03883 NADH-ubiquinone oxidoreductase chain 5 [EC:1.6.5.3] (A)	ko00190:Oxidative phosphorylation	[C]	Energy production and conversion	--	NADH-ubiquinone oxidoreductase chain 5 GN=ND5 OS=Rhipicephalus sanguineus (Brown dog tick) PE=3 SV=1	C	Energy production and conversion	NADH dehydrogenase subunit 5 (mitochondrion) [Arctica islandica]
F01.PB10140	--	--	Molecular Function: sequence-specific DNA binding transcription factor activity (GO:0003700);; Cellular Component: nucleus (GO:0005634);; Biological Process: regulation of transcription, DNA-templated (GO:0006355);; Biological Process: hippo signaling (GO:0035329);;	K09448|0|lgi:LOTGIDRAFT_210691|hypothetical protein; K09448 transcriptional enhancer factor (A)	--	[K]	Transcription	TEA/ATTS domain family	Protein scalloped GN=sd OS=Drosophila melanogaster (Fruit fly) PE=1 SV=1	K	Transcription	hypothetical protein LOTGIDRAFT_210691 [Lottia gigantea]
F01.PB613	[J]	Translation, ribosomal structure and biogenesis	Molecular Function: structural constituent of ribosome (GO:0003735);; Cellular Component: mitochondrial large ribosomal subunit (GO:0005762);; Biological Process: translation (GO:0006412);;	K02884|2.63947e-81|nvi:100121705|39S ribosomal protein L19, mitochondrial; K02884 large subunit ribosomal protein L19 (A)	ko03010:Ribosome	[J]	Translation, ribosomal structure and biogenesis	Ribosomal protein L19	39S ribosomal protein L19, mitochondrial (Precursor) GN=mRpL19 OS=Drosophila melanogaster (Fruit fly) PE=2 SV=1	J	Translation, ribosomal structure and biogenesis	hypothetical protein CAPTEDRAFT_160780 [Capitella teleta]
F01.PB11440	--	--	--	--	--	[S]	Function unknown	Lipoma HMGIC fusion partner-like protein;; PMP-22/EMP/MP20/Claudin tight junction	--	U	Intracellular trafficking, secretion, and vesicular transport	Lipoma HMGIC fusion partner-like 3 protein [Crassostrea gigas]
F01.PB15220	--	--	--	--	--	--	--	Armadillo/beta-catenin-like repeat;; Ubiquitin family	--	S	Function unknown	hypothetical protein CGI_10012413 [Crassostrea gigas]
F01.PB7938	--	--	--	K12655|3.02666e-138|lgi:LOTGIDRAFT_53774|hypothetical protein; K12655 OTU domain-containing protein 5 [EC:3.4.19.12] (A)	--	[TO]	--	OTU-like cysteine protease	Protein ovarian tumor locus GN=otu OS=Drosophila melanogaster (Fruit fly) PE=2 SV=2	O	Posttranslational modification, protein turnover, chaperones	OTU domain-containing protein 5-B [Crassostrea gigas]
F01.PB11494	--	--	--	--	--	--	--	Formin Homology Region 1	--	S	Function unknown	hypothetical protein BRAFLDRAFT_233058 [Branchiostoma floridae]
F01.PB19929	--	--	--	--	--	--	--	Cornifin (SPRR) family	--	--	--	--
F01.PB4199	[R]	General function prediction only	Molecular Function: catalytic activity (GO:0003824);;	--	--	[Q]	Secondary metabolites biosynthesis, transport and catabolism	short chain dehydrogenase;; KR domain	Dehydrogenase/reductase SDR family protein 7-like GN=AGAP005532 OS=Anopheles gambiae (African malaria mosquito) PE=3 SV=3	Q	Secondary metabolites biosynthesis, transport and catabolism	Linear gramicidin synthetase subunit D [Crassostrea gigas]
F01.PB8876	--	--	--	--	--	--	--	--	--	--	--	Serine/threonine-protein kinase Nek1 [Crassostrea gigas]
F01.PB87	[J]	Translation, ribosomal structure and biogenesis	Molecular Function: structural constituent of ribosome (GO:0003735);; Cellular Component: ribosome (GO:0005840);; Biological Process: translation (GO:0006412);;	K02885|2.67511e-85|bfo:BRAFLDRAFT_120900|hypothetical protein; K02885 large subunit ribosomal protein L19e (A)	ko03010:Ribosome	[J]	Translation, ribosomal structure and biogenesis	Ribosomal protein L19e	60S ribosomal protein L19 GN=RpL19 OS=Drosophila melanogaster (Fruit fly) PE=1 SV=2	J	Translation, ribosomal structure and biogenesis	ribosomal protein L19 [Crassostrea gigas]
F01.PB5151	--	--	--	--	--	--	--	--	--	S	Function unknown	Three prime repair exonuclease 1 [Crassostrea gigas]
F01.PB9379	[G]	Carbohydrate transport and metabolism	Biological Process: carbohydrate metabolic process (GO:0005975);; Molecular Function: hydrolase activity, acting on glycosyl bonds (GO:0016798);; Molecular Function: cation binding (GO:0043169);;	--	--	[G]	Carbohydrate transport and metabolism	Alpha amylase, C-terminal all-beta domain;; Alpha amylase, catalytic domain	Alpha-amylase (Precursor) OS=Pecten maximus (King scallop) PE=2 SV=1	G	Carbohydrate transport and metabolism	alpha-amylase [Corbicula fluminea]
F01.PB169	[R]	General function prediction only	--	--	--	[O]	Posttranslational modification, protein turnover, chaperones	Ankyrin repeats (3 copies);; Ankyrin repeat;; Ankyrin repeats (many copies);; Ankyrin repeat;; Ankyrin repeats (many copies)	Ankyrin repeat, bromo and BTB domain-containing protein DDB_G0293800 GN=DDB_G0293800 OS=Dictyostelium discoideum (Slime mold) PE=3 SV=1	O	Posttranslational modification, protein turnover, chaperones	Ankyrin repeat domain-containing protein 45 [Crassostrea gigas]
F01.PB14771	--	--	Molecular Function: nucleic acid binding (GO:0003676);; Molecular Function: catalytic activity (GO:0003824);; Biological Process: metabolic process (GO:0008152);;	K03128|0|lgi:LOTGIDRAFT_228096|hypothetical protein; K03128 transcription initiation factor TFIID subunit 2 (A)	ko03022:Basal transcription factors	[K]	Transcription	Peptidase family M1;; HEAT repeats	Transcription initiation factor TFIID subunit 2 GN=Taf2 OS=Drosophila melanogaster (Fruit fly) PE=1 SV=2	K	Transcription	Transcription initiation factor TFIID subunit 2 [Crassostrea gigas]
F01.PB13928	[O]	Posttranslational modification, protein turnover, chaperones	Molecular Function: oxidoreductase activity (GO:0016491);;	K00432|1.23257e-49|tup:102473362|GPX6; glutathione peroxidase 6 (olfactory); K00432 glutathione peroxidase [EC:1.11.1.9] (A)	ko00480:Glutathione metabolism;ko00590:Arachidonic acid metabolism;ko04918:Thyroid hormone synthesis	[O]	Posttranslational modification, protein turnover, chaperones	Glutathione peroxidase	Glutathione peroxidase {ECO:0000303|PubMed:23567855} OS=Procambarus clarkii (Red swamp crayfish) PE=2 SV=1	O	Posttranslational modification, protein turnover, chaperones	glutathione peroxidase, partial [Reishia clavigera]
F01.PB11968	--	--	--	--	--	[D]	Cell cycle control, cell division, chromosome partitioning	--	Caspase-1 subunit p12 (Precursor) OS=Spodoptera frugiperda (Fall armyworm) PE=1 SV=1	O	Posttranslational modification, protein turnover, chaperones	caspase-3 [Crassostrea angulata]
F01.PB10579	[R]	General function prediction only	Molecular Function: GTPase activity (GO:0003924);; Molecular Function: GTP binding (GO:0005525);; Cellular Component: Golgi stack (GO:0005795);; Biological Process: protein ADP-ribosylation (GO:0006471);; Biological Process: post-Golgi vesicle-mediated transport (GO:0006892);; Biological Process: cell adhesion (GO:0007155);; Biological Process: neurotransmitter secretion (GO:0007269);; Biological…	K07937|4.60182e-52|xma:102228520|ADP-ribosylation factor 1-like; K07937 ADP-ribosylation factor 1 (A)	ko04144:Endocytosis	[U]	Intracellular trafficking, secretion, and vesicular transport	ADP-ribosylation factor family;; Signal recognition particle receptor beta subunit	ADP-ribosylation factor 1 GN=ARF1 OS=Locusta migratoria (Migratory locust) PE=2 SV=2	S	Function unknown	ADP-ribosylation factor [Danaus plexippus]
F01.PB1158	[J]	Translation, ribosomal structure and biogenesis	Molecular Function: structural constituent of ribosome (GO:0003735);; Cellular Component: ribosome (GO:0005840);; Biological Process: translation (GO:0006412);;	K02925|0|tca:660560|60S ribosomal protein L3; K02925 large subunit ribosomal protein L3e (A)	ko03010:Ribosome	[J]	Translation, ribosomal structure and biogenesis	Ribosomal protein L3	60S ribosomal protein L3 GN=RpL3 OS=Drosophila melanogaster (Fruit fly) PE=1 SV=3	J	Translation, ribosomal structure and biogenesis	60S ribosomal protein L3, partial [Crassostrea gigas]
F01.PB20547	--	--	--	--	--	--	--	PMP-22/EMP/MP20/Claudin tight junction;; PMP-22/EMP/MP20/Claudin family	--	--	--	hypothetical protein LOTGIDRAFT_234917 [Lottia gigantea]
F01.PB18641	--	--	--	K10485|1.30748e-143|bfo:BRAFLDRAFT_209210|hypothetical protein; K10485 BTB/POZ domain-containing protein 13 (germ cell-less protein-like 1) (A)	--	[R]	General function prediction only	BTB/POZ domain	Protein germ cell-less GN=gcl OS=Drosophila melanogaster (Fruit fly) PE=2 SV=1	S	Function unknown	hypothetical protein BRAFLDRAFT_209210 [Branchiostoma floridae]
F01.PB2012	--	--	--	--	--	--	--	EB module	--	--	--	--
F01.PB16497	--	--	--	K16761|9.8675e-44|lgi:LOTGIDRAFT_110175|hypothetical protein; K16761 centrosomal protein CEP44 (A)	--	--	--	Centrosomal spindle body, CEP44	--	S	Function unknown	hypothetical protein CGI_10019828 [Crassostrea gigas]
F01.PB13751	--	--	--	K18808|6.91371e-38|mze:101464695|toll-like receptor 13-like; K18808 toll-like receptor 13 (A)	--	[T]	Signal transduction mechanisms	Leucine rich repeat;; Leucine Rich repeats (2 copies);; TIR domain;; TIR domain;; Leucine Rich Repeat	Protein toll (Precursor) GN=Tl OS=Drosophila melanogaster (Fruit fly) PE=1 SV=1	S	Function unknown	toll-like receptor m [Mytilus galloprovincialis]
F01.PB20706	--	--	--	--	--	--	--	Fibronectin type III domain;; B-box zinc finger;; Septin;; AIG1 family;; Elongation factor Tu GTP binding domain;; Protein of unknown function, DUF258;; 50S ribosome-binding GTPase	--	S	Function unknown	hypothetical protein CGI_10023394 [Crassostrea gigas]
F01.PB3343	--	--	--	--	--	--	--	--	--	--	--	FMRFamide receptor [Crassostrea gigas]
F01.PB16069	--	--	Biological Process: transport (GO:0006810);;	--	--	[U]	Intracellular trafficking, secretion, and vesicular transport	Region in Clathrin and VPS;; Vacuolar sorting protein 39 domain 1;; Vacuolar sorting protein 39 domain 2;; CNH domain;; Vacuolar sorting protein 39 domain 2	--	U	Intracellular trafficking, secretion, and vesicular transport	hypothetical protein LOTGIDRAFT_135703 [Lottia gigantea]
F01.PB9164	--	--	Molecular Function: structural molecule activity (GO:0005198);; Biological Process: retrograde vesicle-mediated transport, Golgi to ER (GO:0006890);;	K17268|1.72139e-115|lgi:LOTGIDRAFT_157712|hypothetical protein; K17268 coatomer protein complex, subunit epsilon (A)	--	[U]	Intracellular trafficking, secretion, and vesicular transport	Coatomer epsilon subunit;; Tetratricopeptide repeat;; Tetratricopeptide repeat;; Tetratricopeptide repeat;; TPR repeat;; Tetratricopeptide repeat;; Tetratricopeptide repeat;; Tetratricopeptide repeat;; Tetratricopeptide repeat;; Anaphase-promoting complex, cyclosome, subunit 3;; Tetratricopeptide repeat;; Tetratricopeptide repeat	Coatomer subunit epsilon GN=cope-1 OS=Caenorhabditis elegans PE=3 SV=1	U	Intracellular trafficking, secretion, and vesicular transport	hypothetical protein CAPTEDRAFT_225244 [Capitella teleta]
F01.PB17941	[O]	Posttranslational modification, protein turnover, chaperones	Molecular Function: ATP binding (GO:0005524);; Molecular Function: nucleoside-triphosphatase activity (GO:0017111);;	--	--	[O]	Posttranslational modification, protein turnover, chaperones	ATPase family associated with various cellular activities (AAA);; AAA domain (Cdc48 subfamily);; Holliday junction DNA helicase ruvB N-terminus;; AAA domain (dynein-related subfamily);; NACHT domain	Vacuolar protein sorting-associated protein 4 GN=vps4 OS=Dictyostelium discoideum (Slime mold) PE=3 SV=1	O	Posttranslational modification, protein turnover, chaperones	PREDICTED: vacuolar protein sorting-associated protein 4-like [Saccoglossus kowalevskii]
F01.PB11799	[E]	Amino acid transport and metabolism	--	K11140|1.57786e-143|lgi:LOTGIDRAFT_238559|hypothetical protein; K11140 aminopeptidase N [EC:3.4.11.2] (A)	ko00480:Glutathione metabolism	[EO]	--	ERAP1-like C-terminal domain	Aminopeptidase N (Precursor) GN=APN2 OS=Manduca sexta (Tobacco hawkmoth) PE=1 SV=2	E	Amino acid transport and metabolism	hypothetical protein LOTGIDRAFT_238559 [Lottia gigantea]
F01.PB16753	[P]	Inorganic ion transport and metabolism	--	K13752|1.03939e-151|acs:100561209|slc24a4; solute carrier family 24 (sodium/potassium/calcium exchanger), member 4; K13752 solute carrier family 24 (sodium/potassium/calcium exchanger), member 4 (A)	--	[PT]	--	Sodium/calcium exchanger protein	Probable sodium/potassium/calcium exchanger CG1090 GN=CG1090 OS=Drosophila melanogaster (Fruit fly) PE=2 SV=3	P	Inorganic ion transport and metabolism	hypothetical protein CAPTEDRAFT_110092, partial [Capitella teleta]
F01.PB12329	--	--	--	--	--	[S]	Function unknown	Protein of unknown function (DUF1193)	--	S	Function unknown	hypothetical protein CAPTEDRAFT_19398 [Capitella teleta]
F01.PB20262	[RTKL]	--	Biological Process: nematode larval development (GO:0002119);; Cellular Component: plasma membrane (GO:0005886);; Cellular Component: cell-cell junction (GO:0005911);; Biological Process: embryo development ending in birth or egg hatching (GO:0009792);; Molecular Function: kinase activity (GO:0016301);; Biological Process: larval feeding behavior (GO:0030536);; Biological Process: pharyngeal pump…	--	--	[T]	Signal transduction mechanisms	Protein tyrosine kinase;; Protein kinase domain	Tyrosine kinase receptor Cad96Ca (Precursor) GN=Cad96Ca OS=Drosophila melanogaster (Fruit fly) PE=2 SV=2	T	Signal transduction mechanisms	Tyrosine-protein kinase receptor Tie-1 [Crassostrea gigas]
F01.PB15136	[IQR]	--	Molecular Function: oxidoreductase activity, acting on CH-OH group of donors (GO:0016614);;	--	--	[I]	Lipid transport and metabolism	short chain dehydrogenase;; Enoyl-(Acyl carrier protein) reductase;; KR domain	Uncharacterized oxidoreductase T05C12.3 GN=T05C12.3 OS=Caenorhabditis elegans PE=3 SV=1	S	Function unknown	hypothetical protein LOTGIDRAFT_190314, partial [Lottia gigantea]
F01.PB8183	[P]	Inorganic ion transport and metabolism	Molecular Function: oxidoreductase activity (GO:0016491);;	K00597|1.90206e-97|mcf:101925754|uncharacterized LOC101925754; K00597 methionine synthase reductase [EC:1.16.1.8] (A)	--	[C]	Energy production and conversion	Oxidoreductase NAD-binding domain;; FAD binding domain	Putative methionine synthase reductase GN=tag-165 OS=Caenorhabditis elegans PE=3 SV=1	P	Inorganic ion transport and metabolism	PREDICTED: methionine synthase reductase-like isoform X1 [Aplysia californica]
F01.PB7817	--	--	--	K12026|2.07083e-11|bfo:BRAFLDRAFT_104271|hypothetical protein; K12026 tripartite motif-containing protein 56 [EC:6.3.2.19] (A)	--	[O]	Posttranslational modification, protein turnover, chaperones	Spectrin repeat;; NHL repeat	--	S	Function unknown	Tripartite motif-containing protein 56 [Crassostrea gigas]
F01.PB17199	[U]	Intracellular trafficking, secretion, and vesicular transport	Molecular Function: structural molecule activity (GO:0005198);; Biological Process: intracellular protein transport (GO:0006886);; Biological Process: vesicle-mediated transport (GO:0016192);; Cellular Component: COPI vesicle coat (GO:0030126);;	K17301|0|lgi:LOTGIDRAFT_183679|hypothetical protein; K17301 coatomer, subunit beta (A)	--	[U]	Intracellular trafficking, secretion, and vesicular transport	Coatomer beta subunit appendage platform;; Coatomer beta C-terminal region;; Adaptin N terminal region	Coatomer subunit beta GN=betaCop OS=Drosophila melanogaster (Fruit fly) PE=2 SV=2	U	Intracellular trafficking, secretion, and vesicular transport	Coatomer subunit beta [Crassostrea gigas]
F01.PB10496	--	--	--	--	--	[O]	Posttranslational modification, protein turnover, chaperones	CUE domain;; WW domain	--	S	Function unknown	PREDICTED: mucin-5AC-like [Aplysia californica]
F01.PB9053	--	--	Cellular Component: centrosome (GO:0005813);; Cellular Component: dynactin complex (GO:0005869);; Biological Process: microtubule-based process (GO:0007017);;	K10424|4.31384e-41|lgi:LOTGIDRAFT_223566|hypothetical protein; K10424 dynactin 2 (A)	--	[Z]	Cytoskeleton	Dynamitin;; Dynamitin	Probable dynactin subunit 2 GN=Dmn OS=Drosophila pseudoobscura pseudoobscura (Fruit fly) PE=3 SV=1	Z	Cytoskeleton	PREDICTED: dynactin subunit 2-like isoform X1 [Aplysia californica]
F01.PB19824	--	--	--	--	--	--	--	--	--	S	Function unknown	hypothetical protein CGI_10022227 [Crassostrea gigas]
F01.PB5466	--	--	--	--	--	--	--	--	--	--	--	hypothetical protein CGI_10016338 [Crassostrea gigas]
F01.PB7791	[R]	General function prediction only	--	--	--	[R]	General function prediction only	Zinc-finger double domain	Transcription factor hamlet GN=ham OS=Drosophila melanogaster (Fruit fly) PE=2 SV=1	S	Function unknown	Zinc finger protein 91, partial [Stegodyphus mimosarum]
F01.PB3016	--	--	--	--	--	--	--	BRICHOS domain	--	--	--	--
F01.PB16913	--	--	--	K16479|1.5999e-108|lcm:102358661|ODF2; outer dense fiber of sperm tails 2; K16479 outer dense fiber protein 2 (A)	--	--	--	--	--	Z	Cytoskeleton	PREDICTED: outer dense fiber protein 2-like [Saccoglossus kowalevskii]
F01.PB3217	--	--	--	--	--	--	--	--	--	S	Function unknown	UPF0705 protein C11orf49-like protein [Crassostrea gigas]
F01.PB7507	--	--	Biological Process: single-organism process (GO:0044699);;	--	--	[RP]	--	Immunoglobulin I-set domain;; Immunoglobulin domain;; Immunoglobulin domain;; Immunoglobulin V-set domain	Neuroglian (Precursor) GN=Nrg OS=Drosophila melanogaster (Fruit fly) PE=1 SV=2	S	Function unknown	Hemicentin-1 [Crassostrea gigas]
F01.PB17926	--	--	--	--	--	--	--	TNF(Tumour Necrosis Factor) family	--	--	--	--
F01.PB3779	[F]	Nucleotide transport and metabolism	Molecular Function: nucleotide binding (GO:0000166);; Cellular Component: cytoplasm (GO:0005737);; Biological Process: nucleotide metabolic process (GO:0009117);; Biological Process: deoxyribonucleoside triphosphate catabolic process (GO:0009204);; Molecular Function: metal ion binding (GO:0046872);; Molecular Function: nucleoside-triphosphate diphosphatase activity (GO:0047429);;	K01519|3.65387e-84|nve:NEMVE_v1g163483|hypothetical protein; K01519 inosine triphosphate pyrophosphatase [EC:3.6.1.19] (A)	ko00230:Purine metabolism;ko00240:Pyrimidine metabolism;ko00983:Drug metabolism - other enzymes	[F]	Nucleotide transport and metabolism	Ham1 family	Inosine triphosphate pyrophosphatase {ECO:0000255|HAMAP-Rule:MF_03148} GN=v1g163483 OS=Nematostella vectensis (Starlet sea anemone) PE=3 SV=1	F	Nucleotide transport and metabolism	Inosine triphosphate pyrophosphatase [Crassostrea gigas]
F01.PB20629	--	--	Biological Process: transport (GO:0006810);; Cellular Component: integral component of membrane (GO:0016021);;	--	--	[U]	Intracellular trafficking, secretion, and vesicular transport	emp24/gp25L/p24 family/GOLD	Transmembrane emp24 domain-containing protein bai {ECO:0000250|UniProtKB:Q8SXY6} (Precursor) OS=Drosophila grimshawi (Fruit fly) PE=3 SV=2	U	Intracellular trafficking, secretion, and vesicular transport	hypothetical protein LOTGIDRAFT_172557 [Lottia gigantea]
F01.PB14273	[DT]	--	--	K17605|5.1968e-129|lgi:LOTGIDRAFT_224543|hypothetical protein; K17605 serine/threonine-protein phosphatase 2A activator (A)	--	[DT]	--	Phosphotyrosyl phosphate activator (PTPA) protein	Probable serine/threonine-protein phosphatase 2A activator 1 GN=ppp2r4A OS=Dictyostelium discoideum (Slime mold) PE=3 SV=1	T	Signal transduction mechanisms	hypothetical protein CAPTEDRAFT_185148 [Capitella teleta]
F01.PB15771	--	--	--	--	--	[R]	General function prediction only	--	Trafficking protein particle complex subunit 10 GN=SIDL OS=Drosophila melanogaster (Fruit fly) PE=1 SV=1	S	Function unknown	PREDICTED: trafficking protein particle complex subunit 10-like [Aplysia californica]
F01.PB20726	--	--	--	--	--	--	--	Primase C terminal 1 (PriCT-1);; Primase C terminal 1 (PriCT-1)	--	--	--	--
F01.PB8924	--	--	--	--	--	--	--	B-box zinc finger	--	S	Function unknown	Tripartite motif-containing protein 47 [Crassostrea gigas]
F01.PB10620	--	--	--	K17921|1.20281e-52|lgi:LOTGIDRAFT_212744|hypothetical protein; K17921 sorting nexin-7/30 (A)	--	[U]	Intracellular trafficking, secretion, and vesicular transport	Vps5 C terminal like	--	U	Intracellular trafficking, secretion, and vesicular transport	Sorting nexin-30 [Crassostrea gigas]
F01.PB4650	[K]	Transcription	--	K11416|8.63311e-85|aqu:100632618|NAD-dependent deacetylase sirtuin-6-like; K11416 mono-ADP-ribosyltransferase sirtuin 6 [EC:2.4.2.31] (A)	--	[BK]	--	Sir2 family	NAD-dependent protein deacetylase Sirt7 GN=Sirt7 OS=Drosophila melanogaster (Fruit fly) PE=1 SV=2	K	Transcription	NAD-dependent deacetylase sirtuin-6 [Crassostrea gigas]
F01.PB9334	[O]	Posttranslational modification, protein turnover, chaperones	Molecular Function: ATP binding (GO:0005524);; Cellular Component: cytoplasm (GO:0005737);; Biological Process: protein folding (GO:0006457);; Molecular Function: unfolded protein binding (GO:0051082);;	K09499|0|ola:101173660|T-complex protein 1 subunit eta-like; K09499 T-complex protein 1 subunit eta (A)	--	[O]	Posttranslational modification, protein turnover, chaperones	TCP-1/cpn60 chaperonin family	T-complex protein 1 subunit eta GN=cct7 OS=Dictyostelium discoideum (Slime mold) PE=3 SV=1	O	Posttranslational modification, protein turnover, chaperones	predicted protein [Nematostella vectensis]
F01.PB13701	--	--	--	--	--	[S]	Function unknown	Repeat of unknown function (DUF1126);; EF-hand domain pair;; EF-hand domain	--	S	Function unknown	hypothetical protein LOTGIDRAFT_211798 [Lottia gigantea]
F01.PB13302	--	--	Molecular Function: calcium ion binding (GO:0005509);;	--	--	[P]	Inorganic ion transport and metabolism	EF-hand domain pair;; EF-hand domain pair;; EF-hand domain;; EF hand;; EF hand	Calcium uptake protein 1 homolog, mitochondrial GN=CG4495 OS=Drosophila melanogaster (Fruit fly) PE=2 SV=1	S	Function unknown	Calcium-binding atopy-related autoantigen 1 [Crassostrea gigas]
F01.PB11722	--	--	Molecular Function: hydrolase activity (GO:0016787);;	--	--	[O]	Posttranslational modification, protein turnover, chaperones	Papain family cysteine protease;; Cathepsin propeptide inhibitor domain (I29)	Cathepsin L light chain (Precursor) OS=Sarcophaga peregrina (Flesh fly) PE=1 SV=1	O	Posttranslational modification, protein turnover, chaperones	cathepsin L3 [Sinonovacula constricta]
F01.PB14064	--	--	--	--	--	--	--	bZIP Maf transcription factor;; bZIP transcription factor;; Basic region leucine zipper	--	--	--	hypothetical protein CGI_10013436 [Crassostrea gigas]
F01.PB14462	[T]	Signal transduction mechanisms	Molecular Function: phosphoprotein phosphatase activity (GO:0004721);; Biological Process: cellular protein modification process (GO:0006464);; Biological Process: dephosphorylation (GO:0016311);;	K04459|5.7191e-56|lgi:LOTGIDRAFT_54372|hypothetical protein; K04459 dual specificity MAP kinase phosphatase [EC:3.1.3.16 3.1.3.48] (A)	--	[V]	Defense mechanisms	Dual specificity phosphatase, catalytic domain;; Inositol hexakisphosphate;; Protein-tyrosine phosphatase	Dual specificity protein phosphatase Mpk3 {ECO:0000250|UniProtKB:Q16828} GN=Mkp3 OS=Drosophila melanogaster (Fruit fly) PE=1 SV=2	T	Signal transduction mechanisms	hypothetical protein LOTGIDRAFT_54372, partial [Lottia gigantea]
F01.PB8701	--	--	Molecular Function: calcium ion binding (GO:0005509);;	--	--	[T]	Signal transduction mechanisms	EF-hand domain pair;; EF hand;; EF-hand domain;; EF hand;; EF-hand domain pair;; Secreted protein acidic and rich in cysteine Ca binding region	Crustacean calcium-binding protein 23 OS=Orconectes limosus (Spinycheek crayfish) PE=1 SV=1	T	Signal transduction mechanisms	predicted protein [Nematostella vectensis]
F01.PB12545	--	--	--	K13118|1.48512e-145|lgi:LOTGIDRAFT_72520|hypothetical protein; K13118 protein DGCR14 (A)	--	[R]	General function prediction only	Nuclear protein Es2	Protein DGCR14 homolog GN=Es2 OS=Drosophila melanogaster (Fruit fly) PE=1 SV=2	S	Function unknown	hypothetical protein LOTGIDRAFT_72520, partial [Lottia gigantea]
F01.PB3806	[J]	Translation, ribosomal structure and biogenesis	Molecular Function: translation elongation factor activity (GO:0003746);; Molecular Function: GTPase activity (GO:0003924);; Molecular Function: GTP binding (GO:0005525);; Cellular Component: cytoplasm (GO:0005737);; Biological Process: GTP catabolic process (GO:0006184);; Biological Process: translational elongation (GO:0006414);;	K03231|0|bfo:BRAFLDRAFT_122567|hypothetical protein; K03231 elongation factor 1-alpha (A)	ko03013:RNA transport	[J]	Translation, ribosomal structure and biogenesis	Elongation factor Tu C-terminal domain;; Elongation factor Tu domain 2;; Elongation factor Tu GTP binding domain	Elongation factor 1-alpha GN=eft-4 OS=Caenorhabditis elegans PE=3 SV=1	J	Translation, ribosomal structure and biogenesis	translation elongation factor 1-alpha [Dreissena polymorpha]
F01.PB14625	--	--	--	--	--	[YU]	--	Exportin 1-like protein	--	O	Posttranslational modification, protein turnover, chaperones	PREDICTED: importin-11-like [Aplysia californica]
F01.PB10080	--	--	--	K15703|1.45788e-08|cjc:100415669|RNF139; ring finger protein 139; K15703 E3 ubiquitin-protein ligase RNF139 [EC:6.3.2.19] (A)	--	[O]	Posttranslational modification, protein turnover, chaperones	Ring finger domain;; Zinc finger, C3HC4 type (RING finger);; Zinc finger, C3HC4 type (RING finger);; Zinc finger, C3HC4 type (RING finger)	E3 ubiquitin-protein ligase hrd-1 {ECO:0000250|UniProtKB:Q20798} (Precursor) OS=Caenorhabditis briggsae PE=3 SV=2	O	Posttranslational modification, protein turnover, chaperones	RING finger protein 145 [Strongyloides ratti]
F01.PB10566	--	--	--	K12402|3.77849e-63|bfo:BRAFLDRAFT_117900|hypothetical protein; K12402 AP-4 complex subunit mu-1 (A)	ko04142:Lysosome	[U]	Intracellular trafficking, secretion, and vesicular transport	Adaptor complexes medium subunit family	AP-2 complex subunit mu GN=apm2 OS=Dictyostelium discoideum (Slime mold) PE=2 SV=2	U	Intracellular trafficking, secretion, and vesicular transport	hypothetical protein BRAFLDRAFT_117900 [Branchiostoma floridae]
F01.PB8133	[J]	Translation, ribosomal structure and biogenesis	Biological Process: RNA modification (GO:0009451);; Molecular Function: oxidoreductase activity (GO:0016491);; Molecular Function: iron-sulfur cluster binding (GO:0051536);;	--	--	[T]	Signal transduction mechanisms	Radical SAM superfamily;; Uncharacterized protein family UPF0004;; TRAM domain	CDK5RAP1-like protein GN=CG6345 OS=Drosophila melanogaster (Fruit fly) PE=2 SV=1	J	Translation, ribosomal structure and biogenesis	hypothetical protein CAPTEDRAFT_178593 [Capitella teleta]
F01.PB16268	[R]	General function prediction only	Molecular Function: structural molecule activity (GO:0005198);; Biological Process: intracellular protein transport (GO:0006886);; Biological Process: vesicle-mediated transport (GO:0016192);; Molecular Function: myosin heavy chain kinase activity (GO:0016905);; Cellular Component: membrane coat (GO:0030117);;	K17302|0|lgi:LOTGIDRAFT_182444|hypothetical protein; K17302 coatomer, subunit beta' (A)	--	[U]	Intracellular trafficking, secretion, and vesicular transport	Coatomer WD associated region;; WD domain, G-beta repeat;; Coatomer WD associated region	Coatomer subunit beta&apos; GN=beta&apos;Cop OS=Drosophila melanogaster (Fruit fly) PE=2 SV=2	S	Function unknown	hypothetical protein LOTGIDRAFT_182444 [Lottia gigantea]
F01.PB14008	--	--	Molecular Function: motor activity (GO:0003774);; Molecular Function: calmodulin binding (GO:0005516);; Molecular Function: ATP binding (GO:0005524);; Cellular Component: myofibril (GO:0030016);; Cellular Component: myosin filament (GO:0032982);; Molecular Function: actin filament binding (GO:0051015);;	K10352|1.05524e-127|ola:101164699|myosin heavy chain, skeletal muscle-like; K10352 myosin heavy chain (A)	ko04530:Tight junction	[Z]	Cytoskeleton	Myosin tail;; Myosin tail;; Tropomyosin	Myosin heavy chain, striated muscle OS=Argopecten irradians (Bay scallop) PE=1 SV=1	Z	Cytoskeleton	myosin heavy chain isoform A [Octopus bimaculoides]
F01.PB15900	--	--	--	--	--	[T]	Signal transduction mechanisms	Mab-21 protein	Protein mab-21 GN=mab-21 OS=Drosophila pseudoobscura pseudoobscura (Fruit fly) PE=3 SV=1	O	Posttranslational modification, protein turnover, chaperones	hypothetical protein CGI_10019097 [Crassostrea gigas]
F01.PB21484	--	--	--	--	--	[T]	Signal transduction mechanisms	EGF-like domain;; EGF-like domain;; Thrombospondin type 1 domain;; Human growth factor-like EGF;; Agrin NtA domain	Protein shifted (Precursor) GN=shf OS=Drosophila melanogaster (Fruit fly) PE=1 SV=2	S	Function unknown	von Willebrand factor D and EGF domain-containing protein [Crassostrea gigas]
F01.PB17759	[C]	Energy production and conversion	Molecular Function: cytochrome-c oxidase activity (GO:0004129);; Molecular Function: iron ion binding (GO:0005506);; Cellular Component: mitochondrial inner membrane (GO:0005743);; Biological Process: oxidative phosphorylation (GO:0006119);; Molecular Function: electron carrier activity (GO:0009055);; Biological Process: aerobic respiration (GO:0009060);; Cellular Component: integral component of…	K02256|8.07259e-180|aga:COX1|cytochrome c oxidase subunit I; K02256 cytochrome c oxidase subunit 1 [EC:1.9.3.1] (A)	ko00190:Oxidative phosphorylation	[C]	Energy production and conversion	Cytochrome C and Quinol oxidase polypeptide I;; Cytochrome C and Quinol oxidase polypeptide I;; Cytochrome C and Quinol oxidase polypeptide I;; Cytochrome C and Quinol oxidase polypeptide I	Cytochrome c oxidase subunit 1 GN=COI OS=Anopheles gambiae (African malaria mosquito) PE=3 SV=1	C	Energy production and conversion	cytochrome c oxidase subunit I (mitochondrion) [Arctica islandica]
F01.PB9370	--	--	Biological Process: striated muscle myosin thick filament assembly (GO:0071688);;	--	--	--	--	Protein of unknown function (DUF1399)	--	S	Function unknown	PREDICTED: uncharacterized protein LOC101847836 [Aplysia californica]
F01.PB2548	--	--	--	--	--	--	--	C1q domain	--	S	Function unknown	sialic acid-binding lectin [Ruditapes philippinarum]
F01.PB8905	--	--	--	--	--	[S]	Function unknown	Protein of unknown function (DUF2012)	ER membrane protein complex subunit 7 homolog (Precursor) GN=C35D10.1 OS=Caenorhabditis elegans PE=3 SV=1	S	Function unknown	hypothetical protein LOTGIDRAFT_203638 [Lottia gigantea]
F01.PB2569	[K]	Transcription	--	K12625|3.86051e-45|lgi:LOTGIDRAFT_164944|hypothetical protein; K12625 U6 snRNA-associated Sm-like protein LSm6 (A)	ko03018:RNA degradation;ko03040:Spliceosome	[A]	RNA processing and modification	LSM domain	Probable U6 snRNA-associated Sm-like protein LSm6 GN=lsm6 OS=Dictyostelium discoideum (Slime mold) PE=3 SV=1	K	Transcription	U6 snRNA-associated Sm-like protein LSm6 [Crassostrea gigas]
F01.PB15068	--	--	--	--	--	--	--	--	--	--	--	ADAM family mig-17 [Crassostrea gigas]
F01.PB9055	--	--	--	--	--	[T]	Signal transduction mechanisms	Laminin EGF-like (Domains III and V)	Cell death abnormality protein 1 {ECO:0000250|UniProtKB:Q9XWD6} (Precursor) OS=Caenorhabditis briggsae PE=3 SV=2	S	Function unknown	Receptor-type tyrosine-protein phosphatase T [Crassostrea gigas]
F01.PB2896	--	--	--	--	--	--	--	--	--	--	--	hypothetical protein CGI_10015417 [Crassostrea gigas]
F01.PB22350	--	--	--	--	--	[S]	Function unknown	Leucine Rich repeat	--	S	Function unknown	PREDICTED: leucine-rich repeat-containing protein 71-like isoform X7 [Aplysia californica]
F01.PB14637	--	--	--	--	--	--	--	PMP-22/EMP/MP20/Claudin family	--	--	--	--
F01.PB11477	--	--	--	--	--	--	--	--	--	S	Function unknown	unknown [Dendroctonus ponderosae]
F01.PB4672	--	--	--	K15014|1.29169e-68|lgi:LOTGIDRAFT_237985|hypothetical protein; K15014 solute carrier family 29 (equilibrative nucleoside transporter), member 1/2/3 (A)	--	[F]	Nucleotide transport and metabolism	Nucleoside transporter;; Nucleoside transporter	--	S	Function unknown	PREDICTED: equilibrative nucleoside transporter 3-like [Aplysia californica]
F01.PB18879	--	--	Biological Process: cell communication (GO:0007154);; Molecular Function: phosphatidylinositol binding (GO:0035091);;	K17920|0|lgi:LOTGIDRAFT_225261|hypothetical protein; K17920 sorting nexin-5/6/32 (A)	--	[V]	Defense mechanisms	Vps5 C terminal like;; PX domain;; BAR domain	--	U	Intracellular trafficking, secretion, and vesicular transport	Sorting nexin-6 [Crassostrea gigas]
F01.PB14684	--	--	--	--	--	--	--	Putative esterase	--	S	Function unknown	hypothetical protein DAPPUDRAFT_225274 [Daphnia pulex]
F01.PB12398	[R]	General function prediction only	Molecular Function: GTP binding (GO:0005525);; Cellular Component: intracellular (GO:0005622);; Biological Process: small GTPase mediated signal transduction (GO:0007264);; Cellular Component: membrane (GO:0016020);;	K07865|3.72705e-98|lgi:LOTGIDRAFT_150227|hypothetical protein; K07865 Ras homolog gene family, member U (A)	--	[R]	General function prediction only	Ras family;; Miro-like protein;; ADP-ribosylation factor family	Cdc42 homolog (Precursor) OS=Drosophila pseudoobscura pseudoobscura (Fruit fly) PE=3 SV=1	S	Function unknown	hypothetical protein LOTGIDRAFT_150227 [Lottia gigantea]
F01.PB12489	--	--	Molecular Function: binding (GO:0005488);; Biological Process: cellular process (GO:0009987);;	--	--	[T]	Signal transduction mechanisms	Zinc finger, C4 type (two domains);; Ligand-binding domain of nuclear hormone receptor	Ecdysone-induced protein 75B, isoforms C/D GN=Eip75B OS=Drosophila melanogaster (Fruit fly) PE=2 SV=2	K	Transcription	nuclear receptor subfamily 1 DEF [Mytilus galloprovincialis]
F01.PB16620	--	--	--	K17555|8.20813e-18|ame:552560|GB10473; protein phosphatase 1 regulatory subunit 14B-like; K17555 protein phosphatase 1 regulatory subunit 14B (A)	--	--	--	PKC-activated protein phosphatase-1 inhibitor	--	T	Signal transduction mechanisms	PREDICTED: uncharacterized protein LOC101853466 isoform X1 [Aplysia californica]
F01.PB14531	--	--	--	K15259|1.45636e-29|pbi:103065932|poly [ADP-ribose] polymerase 12-like; K15259 poly [ADP-ribose] polymerase 7/11/12/13 [EC:2.4.2.30] (A)	--	--	--	WWE domain;; Galactoside-binding lectin	--	S	Function unknown	Poly [ADP-ribose] polymerase 12 [Crassostrea gigas]
F01.PB5965	--	--	--	--	--	[I]	Lipid transport and metabolism	--	Fatty acid-binding protein OS=Clonorchis sinensis (Chinese liver fluke) PE=2 SV=1	I	Lipid transport and metabolism	fatty acid binding protein [Crassostrea gigas]
F01.PB12504	--	--	--	--	--	[N]	Cell motility	Thymosin beta-4 family;; WH2 motif	--	O	Posttranslational modification, protein turnover, chaperones	hypothetical protein L798_14751 [Zootermopsis nevadensis]
F01.PB21398	--	--	--	--	--	--	--	--	--	S	Function unknown	hypothetical protein LOTGIDRAFT_229443 [Lottia gigantea]
F01.PB17851	--	--	--	--	--	--	--	--	--	J	Translation, ribosomal structure and biogenesis	Putative methyltransferase NSUN7 [Crassostrea gigas]
F01.PB6750	[Z]	Cytoskeleton	Molecular Function: ATP binding (GO:0005524);; Cellular Component: cytoplasm (GO:0005737);; Cellular Component: cytoskeleton (GO:0005856);;	K05692|0|hro:HELRODRAFT_96235|hypothetical protein; K05692 actin beta/gamma 1 (A)	ko04145:Phagosome	[Z]	Cytoskeleton	Actin	Actin, cytoplasmic (Precursor) OS=Biomphalaria glabrata (Bloodfluke planorb) PE=2 SV=2	Z	Cytoskeleton	cytoplasmic actin [Dreissena polymorpha]
F01.PB9636	--	--	Cellular Component: nucleus (GO:0005634);;	K12877|2.76219e-91|lgi:LOTGIDRAFT_219308|hypothetical protein; K12877 protein mago nashi (A)	ko03013:RNA transport;ko03015:mRNA surveillance pathway;ko03040:Spliceosome	[A]	RNA processing and modification	Mago nashi protein	Protein mago nashi GN=mago OS=Drosophila melanogaster (Fruit fly) PE=1 SV=1	A	RNA processing and modification	mago nashi-like protein 2 [Crassostrea gigas]
F01.PB20586	--	--	--	--	--	[DR]	--	--	Apoptosis 1 inhibitor GN=th OS=Drosophila melanogaster (Fruit fly) PE=1 SV=2	--	--	hypothetical protein AND_002425 [Anopheles darlingi]
F01.PB13397	--	--	--	--	--	--	--	--	--	S	Function unknown	PREDICTED: spore wall protein 2-like [Saccoglossus kowalevskii]
F01.PB1932	--	--	--	--	--	--	--	--	--	--	--	hypothetical protein CGI_10026086 [Crassostrea gigas]
F01.PB16652	--	--	--	--	--	--	--	Immunoglobulin V-set domain	--	--	--	--
F01.PB6772	--	--	Cellular Component: polytene chromosome band (GO:0005704);; Cellular Component: microtubule associated complex (GO:0005875);; Biological Process: cellular protein modification process (GO:0006464);; Biological Process: ubiquitin-dependent protein catabolic process (GO:0006511);;	--	--	[OR]	--	Ubiquitin family;; Ubiquitin-2 like Rad60 SUMO-like;; Ubiquitin-like domain;; Telomere stability and silencing;; Ubiquitin-2 like Rad60 SUMO-like;; DUF2407 ubiquitin-like domain;; Protein of unknown function (DUF2870);; GLUT4 regulating protein TUG;; FlgD Ig-like domain	Ubiquitin (Precursor) GN=Ubi-p63E OS=Drosophila melanogaster (Fruit fly) PE=3 SV=1	O	Posttranslational modification, protein turnover, chaperones	PREDICTED: uncharacterized protein LOC754856 [Strongylocentrotus purpuratus]
F01.PB8545	--	--	--	K15310|2.26088e-17|bfo:BRAFLDRAFT_117676|hypothetical protein; K15310 tumor protein p53-inducible nuclear protein 1 (A)	--	--	--	DOR family	--	K	Transcription	Tumor protein p53-inducible nuclear protein 1 [Crassostrea gigas]
F01.PB13584	[R]	General function prediction only	--	K12795|5.86331e-65|hmg:100210536|suppressor of G2 allele of SKP1 homolog; K12795 suppressor of G2 allele of SKP1 (A)	--	[T]	Signal transduction mechanisms	TPR repeat;; Tetratricopeptide repeat;; CS domain;; Tetratricopeptide repeat;; Tetratricopeptide repeat;; Tetratricopeptide repeat;; Tetratricopeptide repeat;; Tetratricopeptide repeat	Protein SUGT1 homolog GN=sugt1 OS=Dictyostelium discoideum (Slime mold) PE=2 SV=1	S	Function unknown	Suppressor of G2 allele of SKP1-like protein [Crassostrea gigas]
F01.PB16953	[E]	Amino acid transport and metabolism	--	K00274|1.00034e-70|lgi:LOTGIDRAFT_190244|hypothetical protein; K00274 monoamine oxidase [EC:1.4.3.4] (A)	ko00260:Glycine, serine and threonine metabolism;ko00330:Arginine and proline metabolism;ko00340:Histidine metabolism;ko00350:Tyrosine metabolism;ko00360:Phenylalanine metabolism;ko00380:Tryptophan metabolism;ko00982:Drug metabolism - cytochrome P450	[Q]	Secondary metabolites biosynthesis, transport and catabolism	Flavin containing amine oxidoreductase;; Flavin containing amine oxidoreductase;; NAD(P)-binding Rossmann-like domain;; Flavin containing amine oxidoreductase;; FAD dependent oxidoreductase;; FAD binding domain;; Thi4 family;; FAD dependent oxidoreductase;; Pyridine nucleotide-disulphide oxidoreductase;; HI0933-like protein;; Pyridine nucleotide-disulphide oxidoreductase;; FAD binding domain	Probable flavin-containing monoamine oxidase A GN=maoA OS=Dictyostelium discoideum (Slime mold) PE=3 SV=1	S	Function unknown	PREDICTED: amine oxidase [flavin-containing]-like, partial [Saccoglossus kowalevskii]
F01.PB22081	--	--	--	--	--	[S]	Function unknown	Uncharacterized conserved protein (DUF2363)	CCR4-NOT transcription complex subunit 11 GN=cnot11 OS=Dictyostelium discoideum (Slime mold) PE=3 SV=1	S	Function unknown	hypothetical protein LOTGIDRAFT_227818 [Lottia gigantea]
F01.PB13723	--	--	--	--	--	--	--	--	--	S	Function unknown	hypothetical protein LOTGIDRAFT_229168 [Lottia gigantea]
F01.PB17089	[RTKL]	--	Biological Process: regulation of protein phosphorylation (GO:0001932);; Molecular Function: cGMP-dependent protein kinase activity (GO:0004692);; Molecular Function: ATP binding (GO:0005524);; Cellular Component: cAMP-dependent protein kinase complex (GO:0005952);; Molecular Function: cAMP-dependent protein kinase regulator activity (GO:0008603);; Molecular Function: cGMP binding (GO:0030553);;	K07376|0|lgi:LOTGIDRAFT_210612|hypothetical protein; K07376 protein kinase, cGMP-dependent [EC:2.7.11.12] (A)	--	[T]	Signal transduction mechanisms	Protein kinase domain;; Cyclic nucleotide-binding domain;; Protein tyrosine kinase	cGMP-dependent protein kinase, isozyme 2 forms cD4/T1/T3A/T3B GN=for OS=Drosophila melanogaster (Fruit fly) PE=1 SV=3	T	Signal transduction mechanisms	cGMP-dependent protein kinase 1, beta isozyme [Crassostrea gigas]
F01.PB3405	--	--	--	K01025|5.60687e-54|lgi:LOTGIDRAFT_110936|hypothetical protein; K01025 [EC:2.8.2.-] (A)	--	[R]	General function prediction only	Sulfotransferase domain	--	S	Function unknown	Sulfotransferase family cytosolic 1B member 1 [Crassostrea gigas]
F01.PB10166	--	--	--	K16506|9.31522e-10|cjc:100407761|FAT1; FAT atypical cadherin 1; K16506 protocadherin Fat 1/2/3 (A)	--	[T]	Signal transduction mechanisms	Cadherin domain	--	S	Function unknown	PREDICTED: protocadherin Fat 4-like [Aplysia californica]
F01.PB15551	--	--	--	--	--	[T]	Signal transduction mechanisms	Coagulation Factor Xa inhibitory site	Low-density lipoprotein receptor-related protein (Precursor) GN=lrp-1 OS=Caenorhabditis elegans PE=1 SV=1	O	Posttranslational modification, protein turnover, chaperones	Low-density lipoprotein receptor-related protein 6 [Crassostrea gigas]
F01.PB20334	[C]	Energy production and conversion	--	K13997|8.98269e-126|isc:IscW_ISCW005143|dihydrolipoamide transacylase, putative (EC:2.3.1.168); K13997 dihydrolipoamide dehydrogenase-binding protein of pyruvate dehydrogenase complex (A)	--	[C]	Energy production and conversion	2-oxoacid dehydrogenases acyltransferase (catalytic domain);; Biotin-requiring enzyme;; e3 binding domain	Dihydrolipoyllysine-residue acetyltransferase component of pyruvate dehydrogenase complex, mitochondrial (Precursor) GN=F23B12.5 OS=Caenorhabditis elegans PE=1 SV=1	C	Energy production and conversion	PREDICTED: pyruvate dehydrogenase protein X component-like [Aplysia californica]
F01.PB19006	--	--	--	--	--	--	--	MYND finger	Zinc finger MYND domain-containing protein 10 homolog GN=CG11253 OS=Drosophila melanogaster (Fruit fly) PE=1 SV=1	S	Function unknown	Zinc finger MYND domain-containing protein 10 [Crassostrea gigas]
F01.PB20035	[O]	Posttranslational modification, protein turnover, chaperones	Molecular Function: ATP binding (GO:0005524);; Cellular Component: cytoplasm (GO:0005737);; Biological Process: protein folding (GO:0006457);; Molecular Function: unfolded protein binding (GO:0051082);;	K09493|2.5815e-144|lgi:LOTGIDRAFT_235667|hypothetical protein; K09493 T-complex protein 1 subunit alpha (A)	--	[O]	Posttranslational modification, protein turnover, chaperones	TCP-1/cpn60 chaperonin family	T-complex protein 1 subunit alpha GN=T-cp1 OS=Drosophila melanogaster (Fruit fly) PE=2 SV=2	O	Posttranslational modification, protein turnover, chaperones	PREDICTED: T-complex protein 1 subunit alpha-like [Aplysia californica]
F01.PB2189	--	--	--	--	--	--	--	Domain of unknown function (DUF4600)	--	S	Function unknown	PREDICTED: coiled-coil domain-containing protein 169-like [Aplysia californica]
F01.PB6795	--	--	--	K13199|4.118e-18|hro:HELRODRAFT_188995|hypothetical protein; K13199 plasminogen activator inhibitor 1 RNA-binding protein (A)	--	[R]	General function prediction only	Hyaluronan / mRNA binding family	--	S	Function unknown	Plasminogen activator inhibitor 1 RNA-binding protein [Crassostrea gigas]
F01.PB20699	[C]	Energy production and conversion	Molecular Function: oxidoreductase activity, acting on NAD(P)H (GO:0016651);; Molecular Function: iron-sulfur cluster binding (GO:0051536);;	K03941|1.81727e-64|bfo:BRAFLDRAFT_287714|hypothetical protein; K03941 NADH dehydrogenase (ubiquinone) Fe-S protein 8 [EC:1.6.5.3 1.6.99.3] (A)	ko00190:Oxidative phosphorylation	[C]	Energy production and conversion	4Fe-4S binding domain;; 4Fe-4S dicluster domain;; 4Fe-4S dicluster domain;; 4Fe-4S dicluster domain;; 4Fe-4S binding domain;; 4Fe-4S binding domain;; 4Fe-4S double cluster binding domain;; 4Fe-4S dicluster domain;; 4Fe-4S dicluster domain;; 4Fe-4S binding domain;; 4Fe-4S dicluster domain	NADH-ubiquinone oxidoreductase subunit 8 GN=NAD8 OS=Reclinomonas americana PE=3 SV=1	C	Energy production and conversion	hypothetical protein BRAFLDRAFT_287714 [Branchiostoma floridae]
F01.PB5258	[F]	Nucleotide transport and metabolism	Biological Process: metabolic process (GO:0008152);; Molecular Function: zinc ion binding (GO:0008270);; Molecular Function: hydrolase activity, acting on carbon-nitrogen (but not peptide) bonds (GO:0016810);;	K01493|3.38494e-75|api:100161474|uncharacterized LOC100161474; K01493 dCMP deaminase [EC:3.5.4.12] (A)	ko00240:Pyrimidine metabolism	[F]	Nucleotide transport and metabolism	Cytidine and deoxycytidylate deaminase zinc-binding region;; Cytidine and deoxycytidylate deaminase zinc-binding region	Probable deoxycytidylate deaminase GN=CG6951 OS=Drosophila melanogaster (Fruit fly) PE=2 SV=1	F	Nucleotide transport and metabolism	PREDICTED: uncharacterized protein LOC105196476 [Solenopsis invicta]
F01.PB11484	[R]	General function prediction only	Molecular Function: hydrolase activity (GO:0016787);;	K01412|8.9682e-177|isc:IscW_ISCW009643|mitochondrial processing peptidase alpha subunit, putative (EC:3.4.24.64); K01412 mitochondrial-processing peptidase subunit alpha [EC:3.4.24.64] (A)	--	[O]	Posttranslational modification, protein turnover, chaperones	Insulinase (Peptidase family M16);; Peptidase M16 inactive domain	Mitochondrial-processing peptidase subunit beta GN=mppB OS=Dictyostelium discoideum (Slime mold) PE=1 SV=1	O	Posttranslational modification, protein turnover, chaperones	PREDICTED: mitochondrial-processing peptidase subunit alpha-like [Aplysia californica]
F01.PB9005	--	--	Biological Process: proteolysis (GO:0006508);; Molecular Function: peptidase activity (GO:0008233);;	K11833|2.37361e-143|lgi:LOTGIDRAFT_226424|hypothetical protein; K11833 ubiquitin carboxyl-terminal hydrolase 2/21 [EC:3.4.19.12] (A)	--	[O]	Posttranslational modification, protein turnover, chaperones	Ubiquitin carboxyl-terminal hydrolase;; Ubiquitin carboxyl-terminal hydrolase	Ubiquitin carboxyl-terminal hydrolase nonstop GN=not OS=Drosophila melanogaster (Fruit fly) PE=1 SV=3	O	Posttranslational modification, protein turnover, chaperones	hypothetical protein LOTGIDRAFT_226424 [Lottia gigantea]
F01.PB4285	--	--	Cellular Component: intracellular (GO:0005622);; Molecular Function: zinc ion binding (GO:0008270);;	--	--	[R]	General function prediction only	Tetratricopeptide repeat	--	S	Function unknown	Tetratricopeptide repeat protein 1 [Crassostrea gigas]
F01.PB2797	[R]	General function prediction only	--	--	--	--	--	WD domain, G-beta repeat	--	S	Function unknown	hypothetical protein CGI_10028782 [Crassostrea gigas]
F01.PB12638	[S]	Function unknown	Molecular Function: iron ion binding (GO:0005506);; Cellular Component: nucleus (GO:0005634);; Molecular Function: histone demethylase activity (H3-K4 specific) (GO:0032453);; Biological Process: histone H3-K4 demethylation (GO:0034720);; Biological Process: negative regulation of transcription, DNA-templated (GO:0045892);; Molecular Function: histone demethylase activity (H3-K36 specific) (GO:00…	K16914|0|lgi:LOTGIDRAFT_194127|hypothetical protein; K16914 bifunctional lysine-specific demethylase and histidyl-hydroxylase NO66 [EC:1.14.11.- 1.14.11.27] (A)	--	[S]	Function unknown	Cupin superfamily protein;; Cupin-like domain;; Cupin domain	Bifunctional lysine-specific demethylase and histidyl-hydroxylase NO66 GN=BRAFLDRAFT_123918 OS=Branchiostoma floridae (Florida lancelet) PE=3 SV=1	K	Transcription	Nucleolar protein 66 [Crassostrea gigas]
F01.PB428	[B]	Chromatin structure and dynamics	Cellular Component: nucleosome (GO:0000786);; Biological Process: nematode larval development (GO:0002119);; Molecular Function: DNA binding (GO:0003677);; Cellular Component: nucleus (GO:0005634);; Biological Process: nucleosome assembly (GO:0006334);; Biological Process: cellular response to DNA damage stimulus (GO:0006974);; Biological Process: determination of adult lifespan (GO:0008340);; Bi…	K11253|1.24137e-90|cqu:CpipJ_CPIJ010364|histone H3.2; K11253 histone H3 (A)	--	[B]	Chromatin structure and dynamics	Core histone H2A/H2B/H3/H4	Histone H3.3 OS=Spisula solidissima (Atlantic surf-clam) PE=1 SV=2	B	Chromatin structure and dynamics	histone H3.2 [Culex quinquefasciatus]
F01.PB12573	--	--	Molecular Function: structural molecule activity (GO:0005198);; Biological Process: intracellular protein transport (GO:0006886);; Biological Process: vesicle-mediated transport (GO:0016192);; Cellular Component: COPI vesicle coat (GO:0030126);;	K17301|0|lgi:LOTGIDRAFT_183679|hypothetical protein; K17301 coatomer, subunit beta (A)	--	[U]	Intracellular trafficking, secretion, and vesicular transport	Adaptin N terminal region;; HEAT repeats;; HEAT repeat;; non-SMC mitotic condensation complex subunit 1;; HEAT-like repeat;; Armadillo/beta-catenin-like repeat;; Coatomer beta subunit appendage platform;; Coatomer beta C-terminal region	Coatomer subunit beta GN=betaCop OS=Drosophila melanogaster (Fruit fly) PE=2 SV=2	U	Intracellular trafficking, secretion, and vesicular transport	PREDICTED: coatomer subunit beta-like isoform X1 [Aplysia californica]
F01.PB20951	--	--	--	K05696|6.29039e-07|lgi:LOTGIDRAFT_218669|hypothetical protein; K05696 tyrosine-protein phosphatase non-receptor type 1 [EC:3.1.3.48] (A)	--	--	--	--	--	--	--	hypothetical protein LOTGIDRAFT_218669 [Lottia gigantea]
F01.PB2821	--	--	--	--	--	--	--	Sushi domain (SCR repeat)	--	--	--	--
F01.PB12168	[T]	Signal transduction mechanisms	Molecular Function: phosphoprotein phosphatase activity (GO:0004721);;	K10147|3.15422e-149|lgi:LOTGIDRAFT_205518|hypothetical protein; K10147 protein phosphatase 1D [EC:3.1.3.16] (A)	--	[T]	Signal transduction mechanisms	Protein phosphatase 2C;; Protein phosphatase 2C	Protein phosphatase 2C 1 GN=GSPATT00029903001 OS=Paramecium tetraurelia PE=1 SV=2	T	Signal transduction mechanisms	hypothetical protein LOTGIDRAFT_205518 [Lottia gigantea]
F01.PB266	--	--	--	--	--	--	--	C1q domain	--	S	Function unknown	Complement C1q-like protein 4 [Crassostrea gigas]
F01.PB22587	--	--	--	--	--	[OR]	--	PMP-22/EMP/MP20/Claudin tight junction;; Tight junction protein, Claudin-like;; PMP-22/EMP/MP20/Claudin family	60S ribosomal protein L40 (Precursor) GN=ubqB OS=Dictyostelium discoideum (Slime mold) PE=1 SV=2	O	Posttranslational modification, protein turnover, chaperones	TPA: TPA_exp: ubiquitin [Amblyomma variegatum]
F01.PB12849	[E]	Amino acid transport and metabolism	Molecular Function: serine-type peptidase activity (GO:0008236);;	--	--	[O]	Posttranslational modification, protein turnover, chaperones	Prolyl oligopeptidase family;; Alpha/beta hydrolase family;; Dienelactone hydrolase family	Dipeptidyl peptidase family member 6 GN=dpf-6 OS=Caenorhabditis elegans PE=3 SV=2	E	Amino acid transport and metabolism	Dipeptidyl peptidase family member 6 [Crassostrea gigas]
F01.PB8144	--	--	Biological Process: reproduction (GO:0000003);; Biological Process: nematode larval development (GO:0002119);; Cellular Component: basement membrane (GO:0005604);; Biological Process: embryo development ending in birth or egg hatching (GO:0009792);; Biological Process: positive regulation of growth rate (GO:0040010);; Biological Process: positive regulation of multicellular organism growth (GO:00…	--	--	[W]	Extracellular structures	Secreted protein acidic and rich in cysteine Ca binding region	SPARC (Precursor) GN=ost-1 OS=Caenorhabditis elegans PE=1 SV=1	S	Function unknown	SPARC protein [Patella vulgata]
F01.PB19429	--	--	--	--	--	--	--	--	--	--	--	hypothetical protein CGI_10025950 [Crassostrea gigas]
F01.PB8690	--	--	--	--	--	--	--	--	--	S	Function unknown	Interferon-induced protein 44-like protein [Crassostrea gigas]
F01.PB1470	--	--	--	K12383|5.48864e-13|dre:550529|gm2a, fb96e04, fb96e10, wu:fb96e04, wu:fb96e10, zgc:110188; GM2 ganglioside activator; K12383 ganglioside GM2 activator (A)	ko04142:Lysosome	--	--	ML domain	--	O	Posttranslational modification, protein turnover, chaperones	ganglioside M2 activator-like protein [Aurelia aurita]
F01.PB10429	[E]	Amino acid transport and metabolism	Biological Process: transport (GO:0006810);; Biological Process: cellular process (GO:0009987);; Molecular Function: hydrolase activity (GO:0016787);; Biological Process: protein metabolic process (GO:0019538);;	K01444|1.09493e-92|phu:Phum_PHUM038290|N, putative (EC:3.5.1.26); K01444 N4-(beta-N-acetylglucosaminyl)-L-asparaginase [EC:3.5.1.26] (A)	ko00511:Other glycan degradation;ko04142:Lysosome	[E]	Amino acid transport and metabolism	Asparaginase;; Asparaginase	Glycosylasparaginase beta chain {ECO:0000250|UniProtKB:P20933} (Precursor) GN=GH22932 OS=Drosophila grimshawi (Fruit fly) PE=3 SV=1	E	Amino acid transport and metabolism	aspartylglucosaminidase [Capsaspora owczarzaki ATCC 30864]
F01.PB7947	--	--	Biological Process: single-organism cellular process (GO:0044763);;	--	--	[T]	Signal transduction mechanisms	Cadherin domain	Protocadherin-like wing polarity protein stan (Precursor) GN=stan OS=Drosophila melanogaster (Fruit fly) PE=1 SV=4	S	Function unknown	hypothetical protein LOTGIDRAFT_156564 [Lottia gigantea]
F01.PB18272	--	--	--	--	--	--	--	--	--	--	--	hypothetical protein LOTGIDRAFT_174864 [Lottia gigantea]
F01.PB13123	--	--	Molecular Function: zinc ion binding (GO:0008270);;	--	--	[R]	General function prediction only	--	--	S	Function unknown	hypothetical protein HELRODRAFT_125254, partial [Helobdella robusta]
F01.PB98	[O]	Posttranslational modification, protein turnover, chaperones	Molecular Function: threonine-type endopeptidase activity (GO:0004298);; Cellular Component: nucleus (GO:0005634);; Cellular Component: cytoplasm (GO:0005737);; Biological Process: ubiquitin-dependent protein catabolic process (GO:0006511);; Cellular Component: proteasome core complex, alpha-subunit complex (GO:0019773);;	K02729|2.21266e-159|lgi:LOTGIDRAFT_232029|hypothetical protein; K02729 20S proteasome subunit alpha 5 [EC:3.4.25.1] (A)	ko03050:Proteasome	[O]	Posttranslational modification, protein turnover, chaperones	Proteasome subunit;; Proteasome subunit A N-terminal signature	Proteasome subunit alpha type-5 GN=Prosalpha5 OS=Drosophila melanogaster (Fruit fly) PE=2 SV=2	O	Posttranslational modification, protein turnover, chaperones	hypothetical protein LOTGIDRAFT_232029 [Lottia gigantea]
F01.PB10661	--	--	--	--	--	--	--	--	--	--	--	Hemicentin-1 [Crassostrea gigas]
F01.PB15650	[T]	Signal transduction mechanisms	--	K17890|2.26071e-143|bfo:BRAFLDRAFT_123636|hypothetical protein; K17890 autophagy-related protein 16, animal type (A)	ko04140:Regulation of autophagy	[R]	General function prediction only	Autophagy protein 16 (ATG16);; WD domain, G-beta repeat;; WD domain, G-beta repeat	Protein tipD GN=tipD OS=Dictyostelium discoideum (Slime mold) PE=3 SV=1	S	Function unknown	Autophagy-related protein 16-1 [Crassostrea gigas]
F01.PB2279	--	--	--	--	--	--	--	Tetratricopeptide repeat	--	--	--	--
F01.PB16693	--	--	--	--	--	--	--	Vault protein inter-alpha-trypsin domain;; von Willebrand factor type A domain	--	S	Function unknown	Inter-alpha-trypsin inhibitor heavy chain H3 [Crassostrea gigas]
F01.PB13677	--	--	--	--	--	--	--	PTB domain (IRS-1 type)	--	S	Function unknown	hypothetical protein CGI_10020439 [Crassostrea gigas]
F01.PB14321	--	--	Molecular Function: endopeptidase inhibitor activity (GO:0004866);; Cellular Component: extracellular space (GO:0005615);; Biological Process: negative regulation of endopeptidase activity (GO:0010951);;	K06530|0|bfo:BRAFLDRAFT_120995|hypothetical protein; K06530 CD109 antigen (A)	--	[O]	Posttranslational modification, protein turnover, chaperones	A-macroglobulin complement component;; A-macroglobulin receptor;; Alpha-macro-globulin thiol-ester bond-forming region;; Prenyltransferase-like;; Prenyltransferase-like	--	S	Function unknown	hypothetical protein CGI_10015501 [Crassostrea gigas]
F01.PB5178	--	--	--	K06700|5.68118e-64|lgi:LOTGIDRAFT_110935|hypothetical protein; K06700 proteasome inhibitor subunit 1 (PI31) (A)	ko03050:Proteasome	[O]	Posttranslational modification, protein turnover, chaperones	PI31 proteasome regulator N-terminal;; PI31 proteasome regulator	Proteasome inhibitor PI31 subunit GN=PI31 OS=Drosophila melanogaster (Fruit fly) PE=1 SV=1	O	Posttranslational modification, protein turnover, chaperones	Proteasome inhibitor PI31 subunit [Crassostrea gigas]
F01.PB17705	--	--	--	K12165|3.21829e-91|lgi:LOTGIDRAFT_213091|hypothetical protein; K12165 ufm1-conjugating enzyme 1 (A)	--	[S]	Function unknown	Ubiquitin-fold modifier-conjugating enzyme 1	Ubiquitin-fold modifier-conjugating enzyme 1 GN=v1g214407 OS=Nematostella vectensis (Starlet sea anemone) PE=3 SV=1	O	Posttranslational modification, protein turnover, chaperones	Ufm1-conjugating enzyme 1 [Crassostrea gigas]
F01.PB5603	--	--	Molecular Function: binding (GO:0005488);; Cellular Component: membrane (GO:0016020);; Cellular Component: intracellular membrane-bounded organelle (GO:0043231);;	--	--	[R]	General function prediction only	Iron-binding zinc finger CDGSH type	CDGSH iron-sulfur domain-containing protein 2 homolog B GN=BRAFLDRAFT_274541 OS=Branchiostoma floridae (Florida lancelet) PE=3 SV=1	S	Function unknown	hypothetical protein LOTGIDRAFT_216266 [Lottia gigantea]
F01.PB6731	--	--	--	K06509|3.01022e-06|ssc:100270689|CD82; CD82 molecule; K06509 CD82 antigen (A)	ko04115:p53 signaling pathway	--	--	Tetraspanin family	--	S	Function unknown	CD82 antigen [Crassostrea gigas]
F01.PB8885	--	--	--	--	--	[WV]	--	--	--	S	Function unknown	hypothetical protein BRAFLDRAFT_66592 [Branchiostoma floridae]
F01.PB6600	[Z]	Cytoskeleton	Molecular Function: GTPase activity (GO:0003924);; Molecular Function: structural constituent of cytoskeleton (GO:0005200);; Molecular Function: ATP binding (GO:0005524);; Molecular Function: GTP binding (GO:0005525);; Cellular Component: cytoplasm (GO:0005737);; Cellular Component: microtubule (GO:0005874);; Biological Process: GTP catabolic process (GO:0006184);; Biological Process: ATP catabol…	K07374|0|dpe:Dper_GL12416|GL12416 gene product from transcript GL12416-RA; K07374 tubulin alpha (A)	ko04145:Phagosome	[Z]	Cytoskeleton	Tubulin/FtsZ family, GTPase domain;; Tubulin C-terminal domain	Tubulin alpha-1 chain OS=Aplysia californica (California sea hare) PE=2 SV=1	Z	Cytoskeleton	GL12416 [Drosophila persimilis]
F01.PB16924	--	--	--	--	--	--	--	--	--	--	--	Insulin receptor substrate 1 [Crassostrea gigas]
F01.PB13815	[K]	Transcription	Molecular Function: transcription coactivator activity (GO:0003713);; Cellular Component: nucleus (GO:0005634);; Cellular Component: cytoplasm (GO:0005737);; Biological Process: central nervous system development (GO:0007417);; Biological Process: open tracheal system development (GO:0007424);; Molecular Function: methyl-CpG binding (GO:0008327);; Molecular Function: protein binding, bridging (GO…	K03627|2.9073e-58|bfo:BRAFLDRAFT_124447|hypothetical protein; K03627 putative transcription factor (A)	--	[K]	Transcription	Multiprotein bridging factor 1;; Helix-turn-helix;; Helix-turn-helix domain	Vegetative-specific protein H7 GN=cinD-2 OS=Dictyostelium discoideum (Slime mold) PE=2 SV=2	K	Transcription	PREDICTED: endothelial differentiation-related factor 1-like [Aplysia californica]
F01.PB4833	[C]	Energy production and conversion	Molecular Function: NADH dehydrogenase (ubiquinone) activity (GO:0008137);; Molecular Function: electron carrier activity (GO:0009055);; Cellular Component: membrane (GO:0016020);; Biological Process: ATP synthesis coupled electron transport (GO:0042773);; Molecular Function: iron-sulfur cluster binding (GO:0051536);;	K03934|1.05027e-144|mgp:100540281|NDUFS1; NADH dehydrogenase (ubiquinone) Fe-S protein 1, 75kDa (NADH-coenzyme Q reductase); K03934 NADH dehydrogenase (ubiquinone) Fe-S protein 1 [EC:1.6.5.3 1.6.99.3] (A)	ko00190:Oxidative phosphorylation	[C]	Energy production and conversion	Molybdopterin oxidoreductase;; NADH-ubiquinone oxidoreductase-G iron-sulfur binding region;; Molybdopterin oxidoreductase;; Domain of unknown function (DUF1982)	NADH-ubiquinone oxidoreductase 75 kDa subunit GN=NAD11 OS=Reclinomonas americana PE=3 SV=1	C	Energy production and conversion	hypothetical protein [Monosiga brevicollis MX1]
F01.PB6259	--	--	--	--	--	[R]	General function prediction only	Sulfotransferase domain;; Sulfotransferase domain	--	S	Function unknown	Sulfotransferase family cytosolic 1B member 1 [Crassostrea gigas]
F01.PB3440	--	--	Molecular Function: nucleotide binding (GO:0000166);; Molecular Function: nucleic acid binding (GO:0003676);;	K14398|1.00629e-38|lgi:LOTGIDRAFT_179298|hypothetical protein; K14398 cleavage and polyadenylation specificity factor subunit 6/7 (A)	ko03015:mRNA surveillance pathway	[A]	RNA processing and modification	--	Cleavage and polyadenylation specificity factor subunit CG7185 GN=CG7185 OS=Drosophila melanogaster (Fruit fly) PE=1 SV=2	A	RNA processing and modification	Cleavage and polyadenylation specificity factor subunit 6 [Crassostrea gigas]
F01.PB21912	--	--	Molecular Function: polypeptide N-acetylgalactosaminyltransferase activity (GO:0004653);; Cellular Component: Golgi apparatus (GO:0005794);; Cellular Component: integral component of membrane (GO:0016021);; Biological Process: protein O-linked glycosylation via threonine (GO:0018243);; Biological Process: multicellular organism reproduction (GO:0032504);;	K00710|0|lgi:LOTGIDRAFT_123129|hypothetical protein; K00710 polypeptide N-acetylgalactosaminyltransferase [EC:2.4.1.41] (A)	ko00512:Mucin type O-Glycan biosynthesis	[O]	Posttranslational modification, protein turnover, chaperones	Glycosyl transferase family 2;; Ricin-type beta-trefoil lectin domain;; Glycosyltransferase like family 2;; N-terminal domain of galactosyltransferase	Polypeptide N-acetylgalactosaminyltransferase 5 GN=gly-5 OS=Caenorhabditis elegans PE=2 SV=2	S	Function unknown	hypothetical protein LOTGIDRAFT_123129, partial [Lottia gigantea]
F01.PB7099	--	--	--	K06530|1.7946e-80|lgi:LOTGIDRAFT_162872|hypothetical protein; K06530 CD109 antigen (A)	--	[O]	Posttranslational modification, protein turnover, chaperones	Alpha-2-macroglobulin family N-terminal region	--	S	Function unknown	thioester-containing protein-D [Azumapecten farreri]
F01.PB15912	--	--	--	--	--	--	--	Ankyrin repeats (many copies);; Ankyrin repeats (3 copies);; Ankyrin repeats (many copies);; Ankyrin repeat;; Ankyrin repeat	--	--	--	hypothetical protein CGI_10012995 [Crassostrea gigas]
F01.PB3523	--	--	--	--	--	--	--	Basic region leucine zipper;; bZIP transcription factor;; bZIP Maf transcription factor	--	--	--	hypothetical protein CGI_10026192 [Crassostrea gigas]
F01.PB15324	--	--	Cellular Component: microtubule cytoskeleton (GO:0015630);; Cellular Component: cytoskeletal part (GO:0044430);;	K16569|0|lgi:LOTGIDRAFT_131294|hypothetical protein; K16569 gamma-tubulin complex component 2 (A)	--	[Z]	Cytoskeleton	Spc97 / Spc98 family;; Spc97 / Spc98 family	Gamma-tubulin complex component 2 homolog GN=Grip84 OS=Drosophila melanogaster (Fruit fly) PE=1 SV=2	S	Function unknown	hypothetical protein LOTGIDRAFT_131294 [Lottia gigantea]
F01.PB10126	--	--	--	--	--	--	--	--	--	--	--	Collagen alpha-4(VI) chain [Crassostrea gigas]
F01.PB15583	--	--	--	--	--	--	--	von Willebrand factor type C domain;; ShK domain-like;; ShK domain-like	--	--	--	Collagen alpha-5(VI) chain [Crassostrea gigas]
F01.PB9160	--	--	--	--	--	--	--	--	--	--	--	hypothetical protein CGI_10016505 [Crassostrea gigas]
F01.PB11658	--	--	--	K09676|6.85598e-24|bfo:BRAFLDRAFT_68093|hypothetical protein; K09676 galactose-3-O-sulfotransferase 3 [EC:2.8.2.-] (A)	--	--	--	Galactose-3-O-sulfotransferase;; Galactose-3-O-sulfotransferase	--	--	--	hypothetical protein BRAFLDRAFT_68093 [Branchiostoma floridae]
F01.PB22091	[QR]	--	Molecular Function: catalytic activity (GO:0003824);;	K10770|4.71842e-179|lgi:LOTGIDRAFT_143038|hypothetical protein; K10770 alkylated DNA repair protein alkB homolog 8 [EC:1.14.11.- 2.1.1.229] (A)	--	[S]	Function unknown	2OG-Fe(II) oxygenase superfamily;; Methyltransferase domain;; 2OG-Fe(II) oxygenase superfamily;; RNA recognition motif (a.k.a. RRM, RBD, or RNP domain);; Methyltransferase domain;; RNA recognition motif. (a.k.a. RRM, RBD, or RNP domain);; Hypothetical methyltransferase	--	L	Replication, recombination and repair	Alkylated DNA repair protein alkB-like protein 8 [Crassostrea gigas]
F01.PB14553	--	--	--	--	--	--	--	Hydroxy-steroid dehydrogenase;; WWamide peptide	--	S	Function unknown	hypothetical protein LOTGIDRAFT_233972 [Lottia gigantea]
F01.PB8890	[Q]	Secondary metabolites biosynthesis, transport and catabolism	Molecular Function: monooxygenase activity (GO:0004497);; Molecular Function: iron ion binding (GO:0005506);; Molecular Function: electron carrier activity (GO:0009055);; Molecular Function: oxidoreductase activity, acting on paired donors, with incorporation or reduction of molecular oxygen (GO:0016705);; Molecular Function: heme binding (GO:0020037);; Biological Process: oxidation-reduction pro…	K17726|0|lgi:LOTGIDRAFT_237658|hypothetical protein; K17726 leukotriene-B4 20-monooxygenase / phylloquinone omega-hydroxylase [EC:1.14.13.30 1.14.13.194] (A)	ko00590:Arachidonic acid metabolism	[QI]	--	Cytochrome P450	Cytochrome P450 4C1 GN=CYP4C1 OS=Blaberus discoidalis (Tropical cockroach) PE=2 SV=1	Q	Secondary metabolites biosynthesis, transport and catabolism	cytochrome P450 [Meretrix meretrix]
F01.PB20967	--	--	--	K14763|1.68267e-40|lgi:LOTGIDRAFT_229116|hypothetical protein; K14763 H/ACA ribonucleoprotein complex non-core subunit NAF1 (A)	--	[S]	Function unknown	Gar1/Naf1 RNA binding region	H/ACA ribonucleoprotein complex non-core subunit NAF1 GN=CG10341 OS=Drosophila melanogaster (Fruit fly) PE=1 SV=2	S	Function unknown	H/ACA ribonucleoprotein complex non-core subunit NAF1 [Crassostrea gigas]
F01.PB1501	--	--	Molecular Function: dolichyl-diphosphooligosaccharide-protein glycotransferase activity (GO:0004579);; Cellular Component: endoplasmic reticulum membrane (GO:0005789);; Biological Process: protein N-linked glycosylation via asparagine (GO:0018279);;	K12670|1.15501e-166|lgi:LOTGIDRAFT_197848|hypothetical protein; K12670 oligosaccharyltransferase complex subunit beta (A)	ko00510:N-Glycan biosynthesis;ko04141:Protein processing in endoplasmic reticulum	[O]	Posttranslational modification, protein turnover, chaperones	Oligosaccharyltransferase 48 kDa subunit beta;; Oligosaccharyltransferase 48 kDa subunit beta;; Oligosaccharyltransferase 48 kDa subunit beta	Probable dolichyl-diphosphooligosaccharide--protein glycosyltransferase 48 kDa subunit (Precursor) GN=T09A5.11 OS=Caenorhabditis elegans PE=3 SV=1	S	Function unknown	hypothetical protein LOTGIDRAFT_197848 [Lottia gigantea]
F01.PB21025	--	--	Molecular Function: motor activity (GO:0003774);; Cellular Component: myofibril (GO:0030016);; Cellular Component: myosin filament (GO:0032982);;	--	--	[Z]	Cytoskeleton	Myosin tail;; Intermediate filament protein	Paramyosin OS=Mytilus galloprovincialis (Mediterranean mussel) PE=2 SV=1	Z	Cytoskeleton	RecName: Full=Paramyosin [Mytilus galloprovincialis]
F01.PB18187	--	--	--	K08825|1.58248e-08|tca:660870|E3 ubiquitin-protein ligase TRIM33-like; K08825 dual specificity tyrosine-phosphorylation-regulated kinase 1 [EC:2.7.12.1] (A)	--	[O]	Posttranslational modification, protein turnover, chaperones	--	--	S	Function unknown	Tripartite motif-containing protein 56 [Crassostrea gigas]
F01.PB19682	--	--	Molecular Function: nucleic acid binding (GO:0003676);;	K12841|2.71016e-24|nvi:100116536|calcium homeostasis endoplasmic reticulum protein; K12841 calcium homeostasis endoplasmic reticulum protein (A)	ko03040:Spliceosome	[R]	General function prediction only	G-patch domain;; Surp module	--	S	Function unknown	Calcium homeostasis endoplasmic reticulum protein [Crassostrea gigas]
F01.PB14830	--	--	Molecular Function: protein dimerization activity (GO:0046983);;	K09115|2.57478e-28|phi:102107427|MNT; MNT, MAX dimerization protein; K09115 MAX-binding protein (A)	--	[K]	Transcription	Helix-loop-helix DNA-binding domain	--	K	Transcription	Max-binding protein MNT [Crassostrea gigas]
F01.PB21907	--	--	--	--	--	--	--	C1q domain	--	--	--	--
F01.PB5798	--	--	--	--	--	--	--	SH2 domain	Tyrosine-protein phosphatase corkscrew (Fragment) GN=csw OS=Drosophila virilis (Fruit fly) PE=3 SV=1	T	Signal transduction mechanisms	SH2B adapter protein 2 [Zootermopsis nevadensis]
F01.PB11450	--	--	--	--	--	--	--	Selenoprotein P, N terminal region;; Selenoprotein P, N terminal region	--	O	Posttranslational modification, protein turnover, chaperones	selenoprotein P [Saccoglossus kowalevskii]
F01.PB10806	--	--	--	--	--	[TZ]	--	LIM domain;; LIM domain	LIM domain-containing protein unc-97 GN=unc-97 OS=Caenorhabditis elegans PE=1 SV=1	S	Function unknown	hypothetical protein LOTGIDRAFT_158825 [Lottia gigantea]
F01.PB21690	--	--	--	--	--	--	--	Opioid growth factor receptor (OGFr) conserved region	--	S	Function unknown	hypothetical protein LOTGIDRAFT_103481, partial [Lottia gigantea]
F01.PB15323	[T]	Signal transduction mechanisms	Molecular Function: hydrolase activity (GO:0016787);;	--	--	[T]	Signal transduction mechanisms	Protein-tyrosine phosphatase;; Dual specificity phosphatase, catalytic domain;; Tyrosine phosphatase family	Tyrosine-protein phosphatase Lar (Precursor) GN=Lar OS=Drosophila melanogaster (Fruit fly) PE=1 SV=2	T	Signal transduction mechanisms	Receptor-type tyrosine-protein phosphatase mu [Crassostrea gigas]
F01.PB10818	--	--	--	--	--	--	--	bZIP transcription factor	--	--	--	--
F01.PB16958	--	--	--	--	--	--	--	--	--	S	Function unknown	TPA: TPA_inf: TEPP protein [Lottia gigantea]
F01.PB15494	--	--	Molecular Function: motor activity (GO:0003774);; Molecular Function: ATP binding (GO:0005524);; Cellular Component: myosin complex (GO:0016459);; Molecular Function: actin filament binding (GO:0051015);;	K10352|1.38726e-172|nvi:100123633|Mhc1; myosin heavy chain, muscle; K10352 myosin heavy chain (A)	--	[Z]	Cytoskeleton	Myosin tail;; Myosin tail;; Myosin tail	Myosin heavy chain, striated muscle OS=Argopecten irradians (Bay scallop) PE=1 SV=1	Z	Cytoskeleton	PREDICTED: myosin heavy chain, striated muscle-like [Aplysia californica]
F01.PB3780	[R]	General function prediction only	--	K04513|1.06918e-11|xma:102233685|transforming protein RhoA-like; K04513 Ras homolog gene family, member A (A)	ko04144:Endocytosis;ko04270:Vascular smooth muscle contraction;ko04310:Wnt signaling pathway;ko04350:TGF-beta signaling pathway;ko04510:Focal adhesion;ko04520:Adherens junction;ko04530:Tight junction;ko04810:Regulation of actin cytoskeleton	[R]	General function prediction only	--	Rho-related protein racB (Precursor) GN=racB OS=Dictyostelium discoideum (Slime mold) PE=1 SV=1	S	Function unknown	unnamed protein product [Oikopleura dioica]
F01.PB17120	--	--	Cellular Component: membrane (GO:0016020);;	K10082|8.35599e-132|isc:IscW_ISCW012623|lectin, putative; K10082 lectin, mannose-binding 2 (A)	ko04141:Protein processing in endoplasmic reticulum	[U]	Intracellular trafficking, secretion, and vesicular transport	Legume-like lectin family	--	U	Intracellular trafficking, secretion, and vesicular transport	Vesicular integral-membrane protein VIP36 [Crassostrea gigas]
F01.PB17259	[I]	Lipid transport and metabolism	--	--	--	[I]	Lipid transport and metabolism	Enoyl-CoA hydratase/isomerase family;; Chromo (CHRromatin Organisation MOdifier) domain	Uncharacterized protein B0272.4 GN=B0272.4 OS=Caenorhabditis elegans PE=3 SV=1	I	Lipid transport and metabolism	Chromodomain Y-like protein 2 [Crassostrea gigas]
F01.PB1760	--	--	Biological Process: pentose-phosphate shunt (GO:0006098);; Molecular Function: xylose isomerase activity (GO:0009045);; Biological Process: D-xylose metabolic process (GO:0042732);; Molecular Function: metal ion binding (GO:0046872);;	K01805|0|lgi:LOTGIDRAFT_202268|hypothetical protein; K01805 xylose isomerase [EC:5.3.1.5] (A)	ko00040:Pentose and glucuronate interconversions;ko00051:Fructose and mannose metabolism	--	--	Xylose isomerase-like TIM barrel	--	G	Carbohydrate transport and metabolism	UPF0663 transmembrane protein C17orf28 [Crassostrea gigas]
F01.PB12590	--	--	--	--	--	--	--	--	--	--	--	hypothetical protein LOTGIDRAFT_230861 [Lottia gigantea]
F01.PB3195	--	--	--	K04811|3.26389e-35|bfo:BRAFLDRAFT_242482|hypothetical protein; K04811 nicotinic acetylcholine receptor alpha-10 (A)	ko04080:Neuroactive ligand-receptor interaction	[T]	Signal transduction mechanisms	Neurotransmitter-gated ion-channel ligand binding domain;; Neurotransmitter-gated ion-channel transmembrane region	Acetylcholine receptor subunit alpha-type acr-16 {ECO:0000250|UniProtKB:P48180} (Precursor) OS=Caenorhabditis briggsae PE=3 SV=2	U	Intracellular trafficking, secretion, and vesicular transport	Neuronal acetylcholine receptor subunit alpha-6 [Crassostrea gigas]
F01.PB2387	--	--	--	K03098|8.87595e-83|lgi:LOTGIDRAFT_204063|hypothetical protein; K03098 apolipoprotein D and lipocalin family protein (A)	--	[M]	Cell wall/membrane/envelope biogenesis	Lipocalin-like domain	--	S	Function unknown	hypothetical protein LOTGIDRAFT_204063 [Lottia gigantea]
F01.PB9720	--	--	--	--	--	--	--	Ligand-binding domain of nuclear hormone receptor	Nuclear hormone receptor E75 GN=E75 OS=Metapenaeus ensis (Greasyback shrimp) PE=2 SV=1	S	Function unknown	Nuclear hormone receptor E75 [Crassostrea gigas]
F01.PB13225	[P]	Inorganic ion transport and metabolism	--	K14445|5.40671e-140|lgi:LOTGIDRAFT_104288|hypothetical protein; K14445 solute carrier family 13 (sodium-dependent dicarboxylate transporter), member 2/3/5 (A)	--	[P]	Inorganic ion transport and metabolism	Sodium:sulfate symporter transmembrane region;; Citrate transporter;; Sodium:sulfate symporter transmembrane region;; Sodium:sulfate symporter transmembrane region	Protein I&apos;m not dead yet GN=Indy OS=Drosophila melanogaster (Fruit fly) PE=1 SV=2	P	Inorganic ion transport and metabolism	hypothetical protein LOTGIDRAFT_104288 [Lottia gigantea]
F01.PB17469	--	--	--	K05195|1.7496e-27|lve:103090211|GLRA3; glycine receptor, alpha 3; K05195 glycine receptor alpha-3 (A)	ko04080:Neuroactive ligand-receptor interaction	[T]	Signal transduction mechanisms	Neurotransmitter-gated ion-channel ligand binding domain	Gamma-aminobutyric acid receptor alpha-like (Precursor) GN=Grd OS=Drosophila melanogaster (Fruit fly) PE=1 SV=1	U	Intracellular trafficking, secretion, and vesicular transport	Glycine receptor subunit alpha-1 [Crassostrea gigas]
F01.PB13298	[H]	Coenzyme transport and metabolism	Molecular Function: catalytic activity (GO:0003824);; Biological Process: metabolic process (GO:0008152);;	K00654|1.65648e-178|lgi:LOTGIDRAFT_206050|hypothetical protein; K00654 serine palmitoyltransferase [EC:2.3.1.50] (A)	ko00600:Sphingolipid metabolism	[O]	Posttranslational modification, protein turnover, chaperones	Aminotransferase class I and II;; Aminotransferase class I and II;; Aminotransferase class I and II	Serine palmitoyltransferase 2 GN=sptl-2 OS=Caenorhabditis elegans PE=3 SV=1	H	Coenzyme transport and metabolism	hypothetical protein LOTGIDRAFT_206050 [Lottia gigantea]
F01.PB2120	--	--	--	--	--	--	--	--	--	S	Function unknown	PREDICTED: transmembrane protein 246-like [Aplysia californica]
F01.PB11999	--	--	--	--	--	--	--	Primase C terminal 1 (PriCT-1);; Primase C terminal 1 (PriCT-1)	--	S	Function unknown	PREDICTED: ankyrin repeat domain-containing protein 50-like [Strongylocentrotus purpuratus]
F01.PB8448	--	--	Molecular Function: metal ion binding (GO:0046872);;	--	--	--	--	MYND finger	Zinc finger MYND domain-containing protein 10 homolog GN=CG11253 OS=Drosophila melanogaster (Fruit fly) PE=1 SV=1	S	Function unknown	Zinc finger MYND domain-containing protein 10 [Crassostrea gigas]
F01.PB2906	--	--	--	K17095|7.66097e-61|lgi:LOTGIDRAFT_219490|hypothetical protein; K17095 annexin A7/11 (A)	--	[U]	Intracellular trafficking, secretion, and vesicular transport	Annexin	Annexin B10 GN=AnxB10 OS=Drosophila melanogaster (Fruit fly) PE=2 SV=3	S	Function unknown	hypothetical protein LOTGIDRAFT_219490 [Lottia gigantea]
F01.PB10293	[O]	Posttranslational modification, protein turnover, chaperones	Molecular Function: ATP binding (GO:0005524);; Molecular Function: microtubule-severing ATPase activity (GO:0008568);;	K12196|0|mze:101481666|vacuolar protein sorting-associated protein 4B-like; K12196 vacuolar protein-sorting-associated protein 4 (A)	ko04144:Endocytosis	[O]	Posttranslational modification, protein turnover, chaperones	ATPase family associated with various cellular activities (AAA);; Vps4 C terminal oligomerisation domain;; MIT (microtubule interacting and transport) domain;; AAA domain (dynein-related subfamily);; IstB-like ATP binding protein;; Holliday junction DNA helicase ruvB N-terminus;; Protein of unknown function (DUF815)	Vacuolar protein sorting-associated protein 4 GN=vps4 OS=Dictyostelium discoideum (Slime mold) PE=3 SV=1	O	Posttranslational modification, protein turnover, chaperones	Vacuolar protein sorting-associated protein 4B [Crassostrea gigas]
F01.PB39	--	--	Biological Process: establishment of mitotic spindle orientation (GO:0000132);; Molecular Function: microtubule motor activity (GO:0003777);; Cellular Component: centriole (GO:0005814);; Cellular Component: cytoplasmic dynein complex (GO:0005868);; Biological Process: autophagy (GO:0006914);; Biological Process: microtubule-based movement (GO:0007018);; Biological Process: spermatid nucleus elong…	K10418|3.50345e-57|dwi:Dwil_GK25335|GK25335 gene product from transcript GK25335-RA; K10418 dynein light chain LC8-type (A)	--	[Z]	Cytoskeleton	Dynein light chain type 1	Dynein light chain 1, cytoplasmic GN=ctp OS=Drosophila melanogaster (Fruit fly) PE=1 SV=1	S	Function unknown	Chain A, Lc8 - Ana2 (159-168) Complex
F01.PB6788	[O]	Posttranslational modification, protein turnover, chaperones	Molecular Function: transferase activity (GO:0016740);;	K00799|1.27226e-62|lgi:LOTGIDRAFT_191561|hypothetical protein; K00799 glutathione S-transferase [EC:2.5.1.18] (A)	ko00480:Glutathione metabolism;ko00980:Metabolism of xenobiotics by cytochrome P450;ko00982:Drug metabolism - cytochrome P450	[O]	Posttranslational modification, protein turnover, chaperones	Glutathione S-transferase, N-terminal domain;; Glutathione S-transferase, N-terminal domain;; Glutathione S-transferase, C-terminal domain;; Glutathione S-transferase, N-terminal domain	Pyrimidodiazepine synthase {ECO:0000305} OS=Drosophila melanogaster (Fruit fly) PE=1 SV=1	O	Posttranslational modification, protein turnover, chaperones	omega glutathione S-transferase [Ruditapes philippinarum]
F01.PB18408	[U]	Intracellular trafficking, secretion, and vesicular transport	--	K04710|3.0681e-104|dre:323020|cers5, lass5, wu:fb79b03, zgc:63908; ceramide synthase 5 (EC:2.3.1.24); K04710 ceramide synthetase [EC:2.3.1.24] (A)	ko00600:Sphingolipid metabolism	[U]	Intracellular trafficking, secretion, and vesicular transport	TLC domain;; Homeobox domain	Ceramide synthase hyl-1 GN=hyl-1 OS=Caenorhabditis elegans PE=1 SV=1	U	Intracellular trafficking, secretion, and vesicular transport	LAG1 longevity assurance-like protein 6 [Crassostrea gigas]
F01.PB22244	--	--	--	--	--	--	--	Glycosyltransferase sugar-binding region containing DXD motif;; TcdA/TcdB catalytic glycosyltransferase domain	--	M	Cell wall/membrane/envelope biogenesis	Mannosyl phosphorylinositol ceramide synthase CSH1 [Crassostrea gigas]
F01.PB22459	[P]	Inorganic ion transport and metabolism	--	K07232|9.84535e-47|lgi:LOTGIDRAFT_236920|hypothetical protein; K07232 cation transport protein ChaC (A)	--	[P]	Inorganic ion transport and metabolism	ChaC-like protein	--	P	Inorganic ion transport and metabolism	Cation transport regulator-like protein 1 [Crassostrea gigas]
F01.PB19064	--	--	--	--	--	--	--	--	--	O	Posttranslational modification, protein turnover, chaperones	Metalloproteinase inhibitor 3 [Crassostrea gigas]
F01.PB18048	--	--	--	--	--	[K]	Transcription	Paf1;; Paf1	RNA polymerase II-associated factor 1 homolog {ECO:0000250|UniProtKB:Q8K2T8} OS=Caenorhabditis elegans PE=2 SV=2	K	Transcription	RNA polymerase II-associated factor 1-like protein [Crassostrea gigas]
F01.PB11605	--	--	--	--	--	--	--	Mitochondrial morphogenesis regulator	Transmembrane protein 11 homolog, mitochondrial GN=Pmi OS=Drosophila melanogaster (Fruit fly) PE=1 SV=3	S	Function unknown	PREDICTED: transmembrane protein 11-A, mitochondrial-like [Saccoglossus kowalevskii]
F01.PB13256	--	--	--	K17491|0|lgi:LOTGIDRAFT_169795|hypothetical protein; K17491 protein phosphatase 4 regulatory subunit 3 (A)	--	[G]	Carbohydrate transport and metabolism	Component of IIS longevity pathway SMK-1	Serine/threonine-protein phosphatase 4 regulatory subunit 3 GN=flfl OS=Drosophila melanogaster (Fruit fly) PE=1 SV=4	S	Function unknown	Serine/threonine-protein phosphatase 4 regulatory subunit 3 [Crassostrea gigas]
F01.PB8600	[R]	General function prediction only	--	--	--	[M]	Cell wall/membrane/envelope biogenesis	Ankyrin repeats (3 copies);; Ankyrin repeats (many copies);; Ankyrin repeats (many copies);; Ankyrin repeat;; Ankyrin repeat	--	S	Function unknown	Ankyrin repeat domain-containing protein 53 [Crassostrea gigas]
F01.PB1529	[P]	Inorganic ion transport and metabolism	--	K01011|1.85369e-54|lgi:LOTGIDRAFT_115146|hypothetical protein; K01011 thiosulfate/3-mercaptopyruvate sulfurtransferase [EC:2.8.1.1 2.8.1.2] (A)	ko00270:Cysteine and methionine metabolism;ko00920:Sulfur metabolism;ko04122:Sulfur relay system	[V]	Defense mechanisms	Rhodanese-like domain	Putative thiosulfate sulfurtransferase mpst-1 GN=mpst-1 OS=Caenorhabditis elegans PE=3 SV=1	P	Inorganic ion transport and metabolism	hypothetical protein LOTGIDRAFT_115146, partial [Lottia gigantea]
F01.PB12423	--	--	--	K06530|1.03559e-180|tad:TRIADDRAFT_55768|hypothetical protein; K06530 CD109 antigen (A)	--	[O]	Posttranslational modification, protein turnover, chaperones	A-macroglobulin complement component;; Alpha-2-macroglobulin family;; Alpha-2-macroglobulin family N-terminal region;; Alpha-macro-globulin thiol-ester bond-forming region;; MG2 domain;; Prenyltransferase-like;; Prenyltransferase-like;; A-macroglobulin receptor	--	S	Function unknown	thioester-containing protein-D [Azumapecten farreri]
F01.PB12757	[O]	Posttranslational modification, protein turnover, chaperones	Molecular Function: protein binding (GO:0005515);; Molecular Function: ion binding (GO:0043167);;	K09504|3.18332e-148|hro:HELRODRAFT_185044|hypothetical protein; K09504 DnaJ homolog subfamily A member 3 (A)	--	[O]	Posttranslational modification, protein turnover, chaperones	DnaJ domain;; DnaJ C terminal domain;; DnaJ central domain	Protein tumorous imaginal discs, mitochondrial (Precursor) GN=l(2)tid OS=Drosophila virilis (Fruit fly) PE=2 SV=1	O	Posttranslational modification, protein turnover, chaperones	hypothetical protein HELRODRAFT_185044 [Helobdella robusta]
F01.PB8280	--	--	--	--	--	--	--	--	--	S	Function unknown	PREDICTED: RNA-directed DNA polymerase from mobile element jockey-like, partial [Saccoglossus kowalevskii]
F01.PB10883	--	--	Cellular Component: integral component of membrane (GO:0016021);;	--	--	[R]	General function prediction only	Cleft lip and palate transmembrane protein 1 (CLPTM1);; Cleft lip and palate transmembrane protein 1 (CLPTM1)	CLPTM1-like membrane protein cnrB GN=cnrB OS=Dictyostelium discoideum (Slime mold) PE=3 SV=1	S	Function unknown	PREDICTED: cleft lip and palate transmembrane protein 1 homolog isoform X2 [Aplysia californica]
F01.PB15585	--	--	--	--	--	--	--	--	--	S	Function unknown	hypothetical protein LOTGIDRAFT_220828 [Lottia gigantea]
F01.PB10942	[I]	Lipid transport and metabolism	Biological Process: metabolic process (GO:0008152);; Molecular Function: transferase activity, transferring acyl groups other than amino-acyl groups (GO:0016747);;	K07509|0|lgi:LOTGIDRAFT_157797|hypothetical protein; K07509 acetyl-CoA acyltransferase [EC:2.3.1.16] (A)	ko00062:Fatty acid elongation;ko00071:Fatty acid degradation;ko00280:Valine, leucine and isoleucine degradation;ko01212:Fatty acid metabolism	[I]	Lipid transport and metabolism	Thiolase, N-terminal domain;; Thiolase, C-terminal domain;; Beta-ketoacyl synthase, N-terminal domain	Uncharacterized protein B0303.3 GN=B0303.3 OS=Caenorhabditis elegans PE=3 SV=1	I	Lipid transport and metabolism	hypothetical protein LOTGIDRAFT_157797 [Lottia gigantea]
F01.PB2400	--	--	--	--	--	--	--	NHL repeat	--	--	--	Tripartite motif-containing protein 56 [Crassostrea gigas]
F01.PB12920	--	--	--	--	--	[PT]	--	Amiloride-sensitive sodium channel	Degenerin-like protein T28D9.7 GN=T28D9.7 OS=Caenorhabditis elegans PE=1 SV=5	S	Function unknown	Amiloride-sensitive cation channel 4-B [Crassostrea gigas]
F01.PB11296	--	--	Biological Process: transport (GO:0006810);; Biological Process: metabolic process (GO:0008152);; Molecular Function: peptidase activity (GO:0008233);;	K08342|2.75299e-09|isc:IscW_ISCW004712|cystein protease, putative; K08342 cysteine protease ATG4 [EC:3.4.22.-] (A)	ko04140:Regulation of autophagy	[ZU]	--	--	--	O	Posttranslational modification, protein turnover, chaperones	autophagy-related 4 [Haemaphysalis longicornis]
F01.PB13477	--	--	--	--	--	--	--	--	--	--	--	hypothetical protein CGI_10010993 [Crassostrea gigas]
F01.PB9024	--	--	--	--	--	--	--	CUB domain	--	--	--	PREDICTED: uncharacterized protein LOC101851179 [Aplysia californica]
F01.PB5915	[O]	Posttranslational modification, protein turnover, chaperones	Molecular Function: ubiquitin-protein transferase activity (GO:0004842);; Biological Process: protein ubiquitination (GO:0016567);;	K10573|3.37162e-87|hro:HELRODRAFT_185973|hypothetical protein; K10573 ubiquitin-conjugating enzyme E2 A [EC:6.3.2.19] (A)	ko04120:Ubiquitin mediated proteolysis	[O]	Posttranslational modification, protein turnover, chaperones	Ubiquitin-conjugating enzyme;; Prokaryotic E2 family B	Ubiquitin-conjugating enzyme E2-17 kDa GN=UbcD6 OS=Drosophila melanogaster (Fruit fly) PE=2 SV=2	O	Posttranslational modification, protein turnover, chaperones	PREDICTED: ubiquitin-conjugating enzyme E2 A-like isoform X1 [Aplysia californica]
F01.PB7206	--	--	--	--	--	--	--	LITAF-like zinc ribbon domain	Cell death-inducing p53-target protein 1 homolog GN=litaf OS=Dictyostelium discoideum (Slime mold) PE=3 SV=1	S	Function unknown	lipopolysaccharide-induced TNF-alpha factor [Meretrix meretrix]
F01.PB9684	--	--	--	--	--	[I]	Lipid transport and metabolism	von Willebrand factor type D domain	Apolipophorin-1 (Precursor) OS=Locusta migratoria (Migratory locust) PE=1 SV=2	S	Function unknown	hypothetical protein CAPTEDRAFT_182417 [Capitella teleta]
F01.PB10607	--	--	Molecular Function: metal ion binding (GO:0046872);;	K16061|1.01174e-35|fab:101816602|baculoviral IAP repeat-containing protein 7-B-like; K16061 baculoviral IAP repeat-containing protein 7/8 (A)	ko04120:Ubiquitin mediated proteolysis;ko04210:Apoptosis	[DR]	--	Inhibitor of Apoptosis domain;; Inhibitor of Apoptosis domain;; Zinc finger, C3HC4 type (RING finger);; Zinc finger, C3HC4 type (RING finger)	Apoptosis 1 inhibitor GN=th OS=Drosophila melanogaster (Fruit fly) PE=1 SV=2	O	Posttranslational modification, protein turnover, chaperones	Baculoviral IAP repeat-containing protein 7-A [Crassostrea gigas]
F01.PB13366	[S]	Function unknown	--	--	--	[L]	Replication, recombination and repair	Mut7-C RNAse domain;; 3'-5' exonuclease	Exonuclease mut-7 GN=mut-7 OS=Caenorhabditis elegans PE=1 SV=1	S	Function unknown	hypothetical protein LOTGIDRAFT_116671 [Lottia gigantea]
F01.PB2761	[J]	Translation, ribosomal structure and biogenesis	Molecular Function: nucleic acid binding (GO:0003676);; Molecular Function: aspartate-tRNA ligase activity (GO:0004815);; Molecular Function: ATP binding (GO:0005524);; Cellular Component: cytoplasm (GO:0005737);; Biological Process: aspartyl-tRNA aminoacylation (GO:0006422);;	K01876|1.71439e-164|lgi:LOTGIDRAFT_118845|hypothetical protein; K01876 aspartyl-tRNA synthetase [EC:6.1.1.12] (A)	ko00970:Aminoacyl-tRNA biosynthesis	[J]	Translation, ribosomal structure and biogenesis	tRNA synthetases class II (D, K and N);; OB-fold nucleic acid binding domain	Aspartate--tRNA ligase, cytoplasmic GN=drs-1 OS=Caenorhabditis elegans PE=3 SV=1	J	Translation, ribosomal structure and biogenesis	hypothetical protein LOTGIDRAFT_118845 [Lottia gigantea]
F01.PB908	[K]	Transcription	Biological Process: spliceosomal complex assembly (GO:0000245);; Molecular Function: nucleic acid binding (GO:0003676);; Cellular Component: small nuclear ribonucleoprotein complex (GO:0030532);; Cellular Component: precatalytic spliceosome (GO:0071011);; Cellular Component: catalytic step 2 spliceosome (GO:0071013);;	K11097|8.30844e-50|lgi:LOTGIDRAFT_207212|hypothetical protein; K11097 small nuclear ribonucleoprotein E (A)	ko03040:Spliceosome	[A]	RNA processing and modification	LSM domain	Probable small nuclear ribonucleoprotein E GN=SmE OS=Drosophila melanogaster (Fruit fly) PE=1 SV=1	K	Transcription	Small nuclear ribonucleoprotein E [Crassostrea gigas]
F01.PB19569	--	--	--	K14315|1.7569e-91|lgi:LOTGIDRAFT_235256|hypothetical protein; K14315 nucleoporin NDC1 (A)	ko03013:RNA transport	[S]	Function unknown	Nucleoporin protein Ndc1-Nup	Nucleoporin ndc-1 GN=npp-22 OS=Caenorhabditis elegans PE=3 SV=1	U	Intracellular trafficking, secretion, and vesicular transport	hypothetical protein LOTGIDRAFT_235256 [Lottia gigantea]
F01.PB11882	--	--	--	K06825|2.5722e-24|xtr:100490545|fbn1; fibrillin 1; K06825 fibrillin 1 (A)	--	[T]	Signal transduction mechanisms	Calcium-binding EGF domain;; Complement Clr-like EGF-like;; SEA domain	Mucin-like protein {ECO:0000303|PubMed:23765379} (Fragment) OS=Acropora millepora (Staghorn coral) PE=1 SV=1	S	Function unknown	PREDICTED: uncharacterized protein LOC101850564 [Aplysia californica]
F01.PB13426	--	--	Cellular Component: extracellular region (GO:0005576);; Molecular Function: heparin binding (GO:0008201);;	--	--	--	--	PTN/MK heparin-binding protein family, C-terminal domain	--	S	Function unknown	PREDICTED: uncharacterized protein LOC101855139 [Aplysia californica]
F01.PB7896	[O]	Posttranslational modification, protein turnover, chaperones	--	--	--	--	--	Uncharacterised protein family (UPF0075)	--	O	Posttranslational modification, protein turnover, chaperones	Anhydro-N-acetylmuramic acid kinase [Crassostrea gigas]
F01.PB5796	--	--	--	--	--	--	--	Universal stress protein family	--	T	Signal transduction mechanisms	hypothetical protein CGI_10025135 [Crassostrea gigas]
F01.PB11389	[J]	Translation, ribosomal structure and biogenesis	Molecular Function: translation elongation factor activity (GO:0003746);; Molecular Function: GTPase activity (GO:0003924);; Molecular Function: GTP binding (GO:0005525);; Biological Process: GTP catabolic process (GO:0006184);; Biological Process: translational elongation (GO:0006414);;	K03234|0|hro:HELRODRAFT_185027|hypothetical protein; K03234 elongation factor 2 (A)	--	[J]	Translation, ribosomal structure and biogenesis	--	Elongation factor 2 GN=EF2 OS=Drosophila melanogaster (Fruit fly) PE=1 SV=4	J	Translation, ribosomal structure and biogenesis	hypothetical protein CGI_10017178 [Crassostrea gigas]
F01.PB17217	--	--	--	K05038|7.68093e-129|lgi:LOTGIDRAFT_53058|hypothetical protein; K05038 solute carrier family 6 (neurotransmitter transporter, amino acid) member 5/7/9/14 (A)	--	[T]	Signal transduction mechanisms	Sodium:neurotransmitter symporter family;; Sodium:neurotransmitter symporter family;; Sodium:neurotransmitter symporter family	Sodium-dependent serotonin transporter GN=SerT OS=Drosophila melanogaster (Fruit fly) PE=2 SV=1	P	Inorganic ion transport and metabolism	hypothetical protein CAPTEDRAFT_225103 [Capitella teleta]
F01.PB10754	--	--	--	--	--	[R]	General function prediction only	--	--	S	Function unknown	S phase cyclin A-associated protein in the endoplasmic reticulum [Crassostrea gigas]
F01.PB1086	--	--	--	K06254|1.51735e-13|lgi:LOTGIDRAFT_210962|hypothetical protein; K06254 agrin (A)	ko04512:ECM-receptor interaction	[R]	General function prediction only	Kazal-type serine protease inhibitor domain;; Kazal-type serine protease inhibitor domain	Serine protease inhibitor dipetalogastin (Precursor; Fragment) OS=Dipetalogaster maximus (Blood-sucking bug) PE=1 SV=2	--	--	serine proteinase inhibitor [Ruditapes philippinarum]
F01.PB12121	--	--	--	--	--	--	--	FHA domain	--	S	Function unknown	PREDICTED: forkhead-associated domain-containing protein 1-like [Aplysia californica]
F01.PB19149	[J]	Translation, ribosomal structure and biogenesis	--	K00604|1.51389e-54|hro:HELRODRAFT_68612|hypothetical protein; K00604 methionyl-tRNA formyltransferase [EC:2.1.2.9] (A)	ko00670:One carbon pool by folate;ko00970:Aminoacyl-tRNA biosynthesis	[J]	Translation, ribosomal structure and biogenesis	Formyl transferase, C-terminal domain	--	J	Translation, ribosomal structure and biogenesis	hypothetical protein HELRODRAFT_68612 [Helobdella robusta]
F01.PB17541	--	--	--	K18271|7.93104e-14|oaa:100083559|purpurin; K18271 retinol-binding protein 4 (A)	--	--	--	Lipocalin / cytosolic fatty-acid binding protein family	--	U	Intracellular trafficking, secretion, and vesicular transport	hypothetical protein LOTGIDRAFT_170319 [Lottia gigantea]
F01.PB14697	--	--	--	--	--	[S]	Function unknown	Protein of unknown function (DUF1649)	--	S	Function unknown	hypothetical protein LOTGIDRAFT_187630 [Lottia gigantea]
F01.PB12148	[IQR]	--	--	K11162|9.9475e-87|lgi:LOTGIDRAFT_154862|hypothetical protein; K11162 retinol dehydrogenase 14 [EC:1.1.1.-] (A)	--	[Q]	Secondary metabolites biosynthesis, transport and catabolism	short chain dehydrogenase;; KR domain;; Enoyl-(Acyl carrier protein) reductase;; NAD dependent epimerase/dehydratase family	WW domain-containing oxidoreductase GN=Wwox OS=Drosophila melanogaster (Fruit fly) PE=2 SV=1	S	Function unknown	hypothetical protein LOTGIDRAFT_154862 [Lottia gigantea]
F01.PB16876	--	--	--	--	--	[W]	Extracellular structures	--	Protein mesh {ECO:0000303|PubMed:22854041} (Precursor) OS=Bombyx mori (Silk moth) PE=1 SV=1	S	Function unknown	Uncharacterized protein K03H1.5 [Crassostrea gigas]
F01.PB22547	[C]	Energy production and conversion	Cellular Component: mitochondrion (GO:0005739);; Molecular Function: electron carrier activity (GO:0009055);; Cellular Component: integral component of membrane (GO:0016021);; Molecular Function: oxidoreductase activity (GO:0016491);; Biological Process: respiratory electron transport chain (GO:0022904);; Molecular Function: metal ion binding (GO:0046872);; Cellular Component: respiratory chain (…	K00412|6.31291e-121|dya:CYTB|cytochrome b; K00412 ubiquinol-cytochrome c reductase cytochrome b subunit (A)	ko00190:Oxidative phosphorylation	[C]	Energy production and conversion	Cytochrome b(C-terminal)/b6/petD;; Cytochrome b(N-terminal)/b6/petB;; Cytochrome b(C-terminal)/b6/petD;; Cytochrome b(N-terminal)/b6/petB;; Cytochrome c oxidase subunit III	Cytochrome b GN=mt:Cyt-b OS=Drosophila yakuba (Fruit fly) PE=3 SV=1	C	Energy production and conversion	cytochrome b (mitochondrion) [Arctica islandica]
F01.PB3663	[R]	General function prediction only	Molecular Function: organic cyclic compound binding (GO:0097159);; Molecular Function: heterocyclic compound binding (GO:1901363);;	K12741|1.78897e-53|lgi:LOTGIDRAFT_128317|hypothetical protein; K12741 heterogeneous nuclear ribonucleoprotein A1/A3 (A)	ko03040:Spliceosome	[R]	General function prediction only	RNA recognition motif. (a.k.a. RRM, RBD, or RNP domain);; RNA recognition motif (a.k.a. RRM, RBD, or RNP domain);; RNA recognition motif. (a.k.a. RRM, RBD, or RNP domain);; RNA recognition motif. (a.k.a. RRM, RBD, or RNP domain);; RNA recognition motif (a.k.a. RRM, RBD, or RNP domain)	Heterogeneous nuclear ribonucleoprotein A1 GN=Hrb98DE OS=Drosophila melanogaster (Fruit fly) PE=2 SV=1	S	Function unknown	hypothetical protein LOTGIDRAFT_128317 [Lottia gigantea]
F01.PB13422	--	--	Biological Process: formation of translation preinitiation complex (GO:0001731);; Molecular Function: translation initiation factor activity (GO:0003743);; Cellular Component: eukaryotic translation initiation factor 3 complex (GO:0005852);; Biological Process: regulation of translational initiation (GO:0006446);; Cellular Component: eukaryotic 43S preinitiation complex (GO:0016282);; Molecular F…	K03252|0|lgi:LOTGIDRAFT_136673|hypothetical protein; K03252 translation initiation factor 3 subunit C (A)	ko03013:RNA transport	[J]	Translation, ribosomal structure and biogenesis	Eukaryotic translation initiation factor 3 subunit 8 N-terminus;; PCI domain;; Eukaryotic translation initiation factor 3 subunit 8 N-terminus	Eukaryotic translation initiation factor 3 subunit C {ECO:0000255|HAMAP-Rule:MF_03002} OS=Aedes aegypti (Yellowfever mosquito) PE=3 SV=1	J	Translation, ribosomal structure and biogenesis	Eukaryotic translation initiation factor 3 subunit C [Crassostrea gigas]
F01.PB16468	--	--	Biological Process: metabolic process (GO:0008152);; Molecular Function: sulfuric ester hydrolase activity (GO:0008484);;	K01137|5.9413e-151|lgi:LOTGIDRAFT_238806|hypothetical protein; K01137 N-acetylglucosamine-6-sulfatase [EC:3.1.6.14] (A)	ko00531:Glycosaminoglycan degradation;ko04142:Lysosome	[G]	Carbohydrate transport and metabolism	Sulfatase;; Sulfatase	Putative extracellular sulfatase Sulf-1 homolog (Precursor) GN=sul-1 OS=Caenorhabditis elegans PE=3 SV=1	P	Inorganic ion transport and metabolism	N-acetylglucosamine-6-sulfatase [Crassostrea gigas]
F01.PB1790	--	--	Molecular Function: catalytic activity (GO:0003824);;	K14076|6.51783e-100|lgi:LOTGIDRAFT_233162|hypothetical protein; K14076 pancreatic lipase-related protein 3 [EC:3.1.1.3] (A)	ko00561:Glycerolipid metabolism	--	--	Lipase;; Alpha/beta hydrolase of unknown function (DUF900)	Phospholipase A1 OS=Vespula squamosa (Southern yellow jacket) PE=1 SV=1	G	Carbohydrate transport and metabolism	Pancreatic lipase-related protein 2 [Crassostrea gigas]
F01.PB3135	--	--	--	--	--	--	--	--	--	T	Signal transduction mechanisms	PREDICTED: uncharacterized protein LOC100378671 [Saccoglossus kowalevskii]
F01.PB20873	[T]	Signal transduction mechanisms	--	--	--	--	--	Universal stress protein family	--	T	Signal transduction mechanisms	PREDICTED: universal stress protein A-like protein-like [Aplysia californica]
F01.PB11700	[O]	Posttranslational modification, protein turnover, chaperones	--	--	--	[O]	Posttranslational modification, protein turnover, chaperones	Hsp70 protein	--	O	Posttranslational modification, protein turnover, chaperones	Heat shock 70 kDa protein 12A [Crassostrea gigas]
F01.PB14183	--	--	--	--	--	--	--	--	--	M	Cell wall/membrane/envelope biogenesis	hypothetical protein CGI_10027817 [Crassostrea gigas]
F01.PB4545	--	--	--	--	--	--	--	Methyltransferase domain;; Methyltransferase FkbM domain	--	S	Function unknown	hypothetical protein CGI_10025427 [Crassostrea gigas]
F01.PB10033	--	--	--	K03989|2.2142e-09|lgi:LOTGIDRAFT_169046|hypothetical protein (A)	--	[O]	Posttranslational modification, protein turnover, chaperones	A-macroglobulin receptor;; A-macroglobulin complement component	--	S	Function unknown	complement component C3 [Ruditapes decussatus]
F01.PB5713	[C]	Energy production and conversion	Biological Process: cellular process (GO:0009987);; Molecular Function: oxidoreductase activity (GO:0016491);; Biological Process: single-organism metabolic process (GO:0044710);;	--	--	[C]	Energy production and conversion	lactate/malate dehydrogenase, NAD binding domain	Putative malate dehydrogenase 1B GN=MDH1B OS=Branchiostoma floridae (Florida lancelet) PE=3 SV=1	C	Energy production and conversion	Putative malate dehydrogenase 1B [Crassostrea gigas]
F01.PB16703	--	--	--	--	--	--	--	Right handed beta helix region	--	S	Function unknown	hypothetical protein LOTGIDRAFT_231552 [Lottia gigantea]
F01.PB9048	[R]	General function prediction only	--	K09201|1.33238e-11|cin:100169915|zf(c2h2)-66, Ci-ZF(C2H2)-66; zinc finger protein (C2H2)-66; K09201 transcription factor YY (A)	--	[R]	General function prediction only	--	Polycomb protein PHO GN=pho OS=Drosophila melanogaster (Fruit fly) PE=1 SV=2	S	Function unknown	zinc finger protein (C2H2)-66 [Ciona intestinalis]
F01.PB13157	--	--	--	--	--	--	--	Domain of unknown function (DUF4603)	--	S	Function unknown	hypothetical protein CGI_10011359 [Crassostrea gigas]
F01.PB7950	--	--	Biological Process: autophagy (GO:0006914);;	K08334|3.65996e-128|lgi:LOTGIDRAFT_226844|hypothetical protein; K08334 beclin 1 (A)	ko04140:Regulation of autophagy	[T]	Signal transduction mechanisms	Autophagy protein Apg6	Beclin-1-like protein GN=Atg6 OS=Drosophila melanogaster (Fruit fly) PE=2 SV=1	S	Function unknown	Beclin-1 [Crassostrea gigas]
F01.PB10259	[R]	General function prediction only	--	--	--	[R]	General function prediction only	Zinc finger, C2H2 type;; Zinc-finger double domain;; C2H2-type zinc finger	Protein glass GN=gl OS=Drosophila melanogaster (Fruit fly) PE=1 SV=2	S	Function unknown	hypothetical protein HELRODRAFT_176020 [Helobdella robusta]
F01.PB9991	--	--	--	--	--	--	--	Lysosome-associated membrane glycoprotein (Lamp)	--	--	--	PREDICTED: lysosome-associated membrane glycoprotein 1-like [Aplysia californica]
F01.PB18194	--	--	Cellular Component: membrane (GO:0016020);;	K13868|6.41832e-75|lgi:LOTGIDRAFT_234854|hypothetical protein; K13868 solute carrier family 7 (L-type amino acid transporter), member 9 (A)	--	[E]	Amino acid transport and metabolism	Amino acid permease;; Amino acid permease;; Amino acid permease;; Amino acid permease;; Amino acid permease	--	E	Amino acid transport and metabolism	hypothetical protein LOTGIDRAFT_234854 [Lottia gigantea]
F01.PB18829	[I]	Lipid transport and metabolism	Molecular Function: carboxylic ester hydrolase activity (GO:0052689);;	--	--	[R]	General function prediction only	Carboxylesterase family;; alpha/beta hydrolase fold	Neurotactin GN=Nrt OS=Drosophila melanogaster (Fruit fly) PE=1 SV=3	I	Lipid transport and metabolism	PREDICTED: neurotactin-like [Saccoglossus kowalevskii]
F01.PB16391	[O]	Posttranslational modification, protein turnover, chaperones	Biological Process: ubiquitin-dependent protein catabolic process (GO:0006511);; Cellular Component: cullin-RING ubiquitin ligase complex (GO:0031461);; Molecular Function: ubiquitin protein ligase binding (GO:0031625);;	K03347|0|lcm:102360768|CUL1; cullin 1; K03347 cullin 1 (A)	ko04110:Cell cycle;ko04114:Oocyte meiosis;ko04120:Ubiquitin mediated proteolysis;ko04141:Protein processing in endoplasmic reticulum;ko04310:Wnt signaling pathway;ko04350:TGF-beta signaling pathway;ko05168:Herpes simplex infection	[D]	Cell cycle control, cell division, chromosome partitioning	Cullin family;; Cullin family	Cullin homolog 1 GN=lin19 OS=Drosophila melanogaster (Fruit fly) PE=1 SV=2	O	Posttranslational modification, protein turnover, chaperones	Cullin-1 [Crassostrea gigas]
F01.PB13655	[DKL]	--	--	--	--	[D]	Cell cycle control, cell division, chromosome partitioning	Cyclin, N-terminal domain	Cyclin-C GN=cycC OS=Dictyostelium discoideum (Slime mold) PE=3 SV=1	DKL	--	PREDICTED: cyclin-related protein FAM58A-like [Aplysia californica]
F01.PB16969	--	--	--	--	--	[T]	Signal transduction mechanisms	Fibronectin type III domain;; Immunoglobulin I-set domain;; Immunoglobulin V-set domain;; Immunoglobulin domain;; Immunoglobulin domain;; Immunoglobulin domain	Neuroglian (Precursor) GN=Nrg OS=Drosophila melanogaster (Fruit fly) PE=1 SV=2	S	Function unknown	hypothetical protein LOTGIDRAFT_138283 [Lottia gigantea]
F01.PB9475	--	--	Biological Process: cellular process (GO:0009987);;	K03255|2.9846e-167|aag:AaeL_AAEL000794|eukaryotic translation initiation factor 3 subunit (eif-3); K03255 protein TIF31 (A)	--	[R]	General function prediction only	Clustered mitochondria;; Mitochondrial function, CLU-N-term;; Protein of unknown function (DUF727)	Clustered mitochondria protein homolog {ECO:0000255|HAMAP-Rule:MF_03013} GN=AAEL000794 OS=Aedes aegypti (Yellowfever mosquito) PE=3 SV=1	S	Function unknown	PREDICTED: clustered mitochondria protein homolog isoform X2 [Harpegnathos saltator]
F01.PB7194	[L]	Replication, recombination and repair	--	K07466|0|lgi:LOTGIDRAFT_208727|hypothetical protein; K07466 replication factor A1 (A)	ko03030:DNA replication;ko03420:Nucleotide excision repair;ko03430:Mismatch repair;ko03440:Homologous recombination;ko03460:Fanconi anemia pathway	[L]	Replication, recombination and repair	Replication factor-A C terminal domain;; Replication factor-A protein 1, N-terminal domain;; OB-fold nucleic acid binding domain	Replication protein A 70 kDa DNA-binding subunit GN=RpA-70 OS=Drosophila melanogaster (Fruit fly) PE=1 SV=1	L	Replication, recombination and repair	hypothetical protein LOTGIDRAFT_208727 [Lottia gigantea]
F01.PB13381	--	--	--	--	--	[R]	General function prediction only	Leucine Rich repeats (2 copies);; Leucine rich repeat;; Leucine Rich Repeat;; Leucine rich repeat;; Leucine Rich repeat;; TIR domain	Leucine-rich repeat-containing protein let-4 (Precursor) GN=let-4 OS=Caenorhabditis elegans PE=2 SV=2	S	Function unknown	PREDICTED: toll-like receptor 3-like [Aplysia californica]
F01.PB13935	--	--	--	K04827|1.09563e-88|lgi:LOTGIDRAFT_228153|hypothetical protein; K04827 amiloride-sensitive sodium channel subunit gamma (A)	--	[PT]	--	Amiloride-sensitive sodium channel	Degenerin unc-8 GN=unc-8 OS=Caenorhabditis elegans PE=2 SV=1	S	Function unknown	Amiloride-sensitive sodium channel subunit gamma [Crassostrea gigas]
F01.PB8014	[L]	Replication, recombination and repair	Molecular Function: DNA binding (GO:0003677);; Molecular Function: ATP binding (GO:0005524);; Biological Process: DNA replication (GO:0006260);; Molecular Function: nucleoside-triphosphatase activity (GO:0017111);;	K10738|1.06833e-165|lgi:LOTGIDRAFT_121966|hypothetical protein; K10738 DNA helicase MCM9 [EC:3.6.4.12] (A)	--	[L]	Replication, recombination and repair	MCM2/3/5 family;; Magnesium chelatase, subunit ChlI;; AAA domain (dynein-related subfamily)	DNA replication licensing factor mcm-6 GN=mcm-6 OS=Caenorhabditis elegans PE=1 SV=1	L	Replication, recombination and repair	DNA replication licensing factor MCM9 [Crassostrea gigas]
F01.PB11107	[LDA]	--	--	K12619|1.24889e-123|nvi:100117393|5'-3' exoribonuclease 2 homolog; K12619 5'-3' exoribonuclease 2 [EC:3.1.13.-] (A)	ko03008:Ribosome biogenesis in eukaryotes;ko03018:RNA degradation	[LA]	--	--	5&apos;-3&apos; exoribonuclease 2 homolog GN=xrn-2 OS=Caenorhabditis elegans PE=1 SV=2	ADL	--	PREDICTED: 5&apos;-3&apos; exoribonuclease 2-like [Aplysia californica]
F01.PB12151	--	--	--	--	--	--	--	PMP-22/EMP/MP20/Claudin tight junction;; Tight junction protein, Claudin-like;; PMP-22/EMP/MP20/Claudin family	--	S	Function unknown	PREDICTED: uncharacterized protein LOC101854199 [Aplysia californica]
F01.PB21068	--	--	--	--	--	--	--	--	--	--	--	hypothetical protein CGI_10007112 [Crassostrea gigas]
F01.PB13605	--	--	--	--	--	--	--	--	--	U	Intracellular trafficking, secretion, and vesicular transport	macrophage expressed protein [Haliotis discus discus]
F01.PB18183	--	--	--	K11291|2.33257e-50|lgi:LOTGIDRAFT_55307|hypothetical protein; K11291 nuclear autoantigenic sperm protein (A)	--	[BD]	--	SHNi-TPR;; Tetratricopeptide repeat;; Tetratricopeptide repeat;; Tetratricopeptide repeat;; TPR repeat	Protein HGV2 GN=HGV2 OS=Halocynthia roretzi (Sea squirt) PE=2 SV=1	S	Function unknown	Nuclear autoantigenic sperm protein [Crassostrea gigas]
F01.PB15416	[F]	Nucleotide transport and metabolism	Molecular Function: formate-tetrahydrofolate ligase activity (GO:0004329);; Molecular Function: methylenetetrahydrofolate dehydrogenase (NADP+) activity (GO:0004488);; Molecular Function: ATP binding (GO:0005524);; Biological Process: folic acid-containing compound biosynthetic process (GO:0009396);; Biological Process: oxidation-reduction process (GO:0055114);;	K00288|0|lgi:LOTGIDRAFT_201055|hypothetical protein; K00288 methylenetetrahydrofolate dehydrogenase (NADP+) / methenyltetrahydrofolate cyclohydrolase / formyltetrahydrofolate synthetase [EC:1.5.1.5 3.5.4.9 6.3.4.3] (A)	ko00670:One carbon pool by folate	[H]	Coenzyme transport and metabolism	Formate--tetrahydrofolate ligase;; Tetrahydrofolate dehydrogenase/cyclohydrolase, catalytic domain;; Tetrahydrofolate dehydrogenase/cyclohydrolase, NAD(P)-binding domain	Formyltetrahydrofolate synthetase GN=pug OS=Drosophila melanogaster (Fruit fly) PE=1 SV=4	H	Coenzyme transport and metabolism	PREDICTED: c-1-tetrahydrofolate synthase, cytoplasmic-like [Aplysia californica]
F01.PB998	--	--	--	--	--	--	--	--	--	S	Function unknown	hypothetical protein CGI_10022699 [Crassostrea gigas]
F01.PB16113	--	--	--	--	--	--	--	--	--	--	--	hypothetical protein LOTGIDRAFT_232590 [Lottia gigantea]
F01.PB8204	--	--	--	K16061|8.34593e-23|xma:102220596|baculoviral IAP repeat-containing protein 7-B-like; K16061 baculoviral IAP repeat-containing protein 7/8 (A)	ko04120:Ubiquitin mediated proteolysis;ko04210:Apoptosis	[DR]	--	Inhibitor of Apoptosis domain	Apoptosis 2 inhibitor GN=Iap2 OS=Drosophila melanogaster (Fruit fly) PE=2 SV=3	O	Posttranslational modification, protein turnover, chaperones	inhibitor of apoptosis protein [Crassostrea gigas]
F01.PB20457	[J]	Translation, ribosomal structure and biogenesis	--	K01872|0|tgu:100231217|AARS2; alanyl-tRNA synthetase 2, mitochondrial; K01872 alanyl-tRNA synthetase [EC:6.1.1.7] (A)	ko00970:Aminoacyl-tRNA biosynthesis	[J]	Translation, ribosomal structure and biogenesis	tRNA synthetases class II (A);; Threonyl and Alanyl tRNA synthetase second additional domain	Alanine--tRNA ligase, cytoplasmic {ECO:0000255|HAMAP-Rule:MF_03133} GN=CG13391 OS=Drosophila melanogaster (Fruit fly) PE=2 SV=1	J	Translation, ribosomal structure and biogenesis	Alanyl-tRNA synthetase, cytoplasmic [Crassostrea gigas]
F01.PB14195	--	--	Molecular Function: RNA polymerase II core promoter proximal region sequence-specific DNA binding transcription factor activity involved in negative regulation of transcription (GO:0001078);; Biological Process: embryonic development via the syncytial blastoderm (GO:0001700);; Molecular Function: steroid hormone receptor activity (GO:0003707);; Molecular Function: ligand-activated sequence-specif…	K08547|3.08266e-167|phi:102109696|NR2F1; nuclear receptor subfamily 2, group F, member 1; K08547 COUP transcription factor 1 (A)	--	[T]	Signal transduction mechanisms	Ligand-binding domain of nuclear hormone receptor;; Zinc finger, C4 type (two domains)	Steroid receptor seven-up, isoforms B/C GN=svp OS=Drosophila melanogaster (Fruit fly) PE=2 SV=1	K	Transcription	COUP-TF [Branchiostoma floridae]
F01.PB5669	[R]	General function prediction only	--	--	--	[M]	Cell wall/membrane/envelope biogenesis	Ankyrin repeats (3 copies);; Ankyrin repeat;; Ankyrin repeats (many copies);; Ankyrin repeat;; Ankyrin repeats (many copies)	Homeobox protein Wariai GN=warA OS=Dictyostelium discoideum (Slime mold) PE=2 SV=1	S	Function unknown	PREDICTED: ankyrin repeat and protein kinase domain-containing protein 1-like isoform X1 [Aplysia californica]
F01.PB21059	[R]	General function prediction only	--	K14838|2.40467e-33|xla:398645|nifk, mki67ip, mki67ipl; nucleolar protein interacting with the FHA domain of MKI67; K14838 nucleolar protein 15 (A)	--	[R]	General function prediction only	Autophagy protein Atg8 ubiquitin like	Autophagy-related protein 8 (Precursor) GN=atg8 OS=Dictyostelium discoideum (Slime mold) PE=2 SV=1	S	Function unknown	hypothetical protein CAPTEDRAFT_150391 [Capitella teleta]
F01.PB20964	[IQ]	--	--	--	--	--	--	AMP-binding enzyme	--	IQ	--	Acyl-CoA synthetase family member 2, mitochondrial [Crassostrea gigas]
F01.PB8259	[L]	Replication, recombination and repair	Molecular Function: transferase activity (GO:0016740);;	K10756|3.49589e-72|nve:NEMVE_v1g166966|hypothetical protein; K10756 replication factor C subunit 3/5 (A)	ko03030:DNA replication;ko03420:Nucleotide excision repair;ko03430:Mismatch repair	[DL]	--	--	Probable replication factor C subunit 3 GN=rfc3 OS=Dictyostelium discoideum (Slime mold) PE=3 SV=1	L	Replication, recombination and repair	hypothetical protein CAPTEDRAFT_181059 [Capitella teleta]
F01.PB11394	--	--	--	--	--	[T]	Signal transduction mechanisms	Neurotransmitter-gated ion-channel ligand binding domain	Acetylcholine receptor subunit beta-type acr-2 (Precursor) GN=acr-2 OS=Caenorhabditis elegans PE=2 SV=1	U	Intracellular trafficking, secretion, and vesicular transport	neuronal acetylcholine receptor subunit alpha-10-like precursor [Aplysia californica]
F01.PB20564	[D]	Cell cycle control, cell division, chromosome partitioning	--	--	--	[D]	Cell cycle control, cell division, chromosome partitioning	--	--	D	Cell cycle control, cell division, chromosome partitioning	Kyphoscoliosis peptidase [Crassostrea gigas]
F01.PB15934	--	--	--	K00727|7.07827e-66|lgi:LOTGIDRAFT_104647|hypothetical protein; K00727 beta-1,3-galactosyl-O-glycosyl-glycoprotein beta-1,6-N-acetylglucosaminyltransferase [EC:2.4.1.102] (A)	ko00512:Mucin type O-Glycan biosynthesis	[G]	Carbohydrate transport and metabolism	Core-2/I-Branching enzyme	--	S	Function unknown	hypothetical protein LOTGIDRAFT_104647 [Lottia gigantea]
F01.PB65	[J]	Translation, ribosomal structure and biogenesis	Molecular Function: structural constituent of ribosome (GO:0003735);; Cellular Component: ribosome (GO:0005840);; Biological Process: translation (GO:0006412);;	K02877|1.57424e-105|isc:IscW_ISCW008173|ribosomal protein L15, putative; K02877 large subunit ribosomal protein L15e (A)	ko03010:Ribosome	[J]	Translation, ribosomal structure and biogenesis	Ribosomal L15	60S ribosomal protein L15 GN=RpL15 OS=Chironomus tentans (Midge) PE=3 SV=3	J	Translation, ribosomal structure and biogenesis	PREDICTED: 60S ribosomal protein L15-like isoform X1 [Aplysia californica]
F01.PB14410	--	--	--	--	--	--	--	Family of unknown function with LKAAEAR motif	--	S	Function unknown	hypothetical protein LOTGIDRAFT_236793 [Lottia gigantea]
F01.PB13098	--	--	Biological Process: transport (GO:0006810);;	--	--	[U]	Intracellular trafficking, secretion, and vesicular transport	Clathrin adaptor complex small chain	Probable coatomer subunit zeta GN=F59E10.3 OS=Caenorhabditis elegans PE=3 SV=1	U	Intracellular trafficking, secretion, and vesicular transport	hypothetical protein LOTGIDRAFT_156936 [Lottia gigantea]
F01.PB8191	--	--	--	--	--	--	--	--	--	S	Function unknown	hypothetical protein LOTGIDRAFT_236277 [Lottia gigantea]
F01.PB20530	--	--	--	K17824|6.63947e-88|ame:410394|GB10252; DCN1-like protein 4-like; K17824 DCN1-like protein 4/5 (A)	--	[S]	Function unknown	Cullin binding	DCN1-like protein 2 GN=DDB_G0272016 OS=Dictyostelium discoideum (Slime mold) PE=3 SV=1	S	Function unknown	DCN1-like protein 4, partial [Crassostrea gigas]
F01.PB2968	--	--	--	--	--	--	--	--	--	--	--	hypothetical protein CGI_10020524 [Crassostrea gigas]
F01.PB8159	--	--	--	--	--	--	--	--	--	--	--	Receptor-type tyrosine-protein phosphatase T [Crassostrea gigas]
F01.PB10009	[R]	General function prediction only	--	K09228|9.7047e-51|myb:102262555|zinc finger protein 850-like; K09228 KRAB domain-containing zinc finger protein (A)	--	[R]	General function prediction only	Zinc-finger double domain;; Zinc finger, C2H2 type;; C2H2-type zinc finger;; Zinc-finger double-stranded RNA-binding;; C2H2-type zinc finger;; Zinc-finger of C2H2 type;; Zinc-finger double domain;; Zinc finger, C2H2 type;; C2H2-type zinc finger;; Zinc-finger double-stranded RNA-binding	Serendipity locus protein H-1 GN=wdn OS=Drosophila melanogaster (Fruit fly) PE=1 SV=2	S	Function unknown	PREDICTED: zinc finger protein 2 homolog [Acyrthosiphon pisum]
F01.PB16184	--	--	--	--	--	--	--	TNF(Tumour Necrosis Factor) family	--	S	Function unknown	hypothetical protein LOTGIDRAFT_160166 [Lottia gigantea]
F01.PB21462	[IQR]	--	--	--	--	[QR]	--	short chain dehydrogenase;; Enoyl-(Acyl carrier protein) reductase;; KR domain;; Fungal family of unknown function (DUF1776)	3 beta-hydroxysteroid dehydrogenase dhs-16 GN=dhs-16 OS=Caenorhabditis elegans PE=2 SV=1	S	Function unknown	hypothetical protein LOTGIDRAFT_110173, partial [Lottia gigantea]
F01.PB684	--	--	--	--	--	--	--	--	--	--	--	QSGamide neuropeptide precursor [Platynereis dumerilii]
F01.PB3238	--	--	--	--	--	--	--	--	--	--	--	hypothetical protein CGI_10011116 [Crassostrea gigas]
F01.PB9342	[Z]	Cytoskeleton	Molecular Function: GTPase activity (GO:0003924);; Molecular Function: structural constituent of cytoskeleton (GO:0005200);; Molecular Function: GTP binding (GO:0005525);; Cellular Component: cytoplasm (GO:0005737);; Cellular Component: microtubule (GO:0005874);; Biological Process: GTP catabolic process (GO:0006184);; Biological Process: microtubule-based process (GO:0007017);; Biological Proces…	--	--	[Z]	Cytoskeleton	Tubulin/FtsZ family, GTPase domain	Tubulin beta chain OS=Enteroctopus dofleini (Giant octopus) PE=2 SV=1	Z	Cytoskeleton	Tubulin beta chain, partial [Reticulomyxa filosa]
F01.PB6017	--	--	--	--	--	--	--	Flagellar C1a complex subunit C1a-32	--	Q	Secondary metabolites biosynthesis, transport and catabolism	hypothetical protein LOTGIDRAFT_203888 [Lottia gigantea]
F01.PB2247	--	--	--	K18156|3.1499e-46|cqu:CpipJ_CPIJ004694|hypothetical protein; K18156 mitochondrial inner membrane protease ATP23 [EC:3.4.24.-] (A)	--	[L]	Replication, recombination and repair	Peptidase M76 family;; Peptidase M76 family	Mitochondrial inner membrane protease ATP23 homolog GN=DDB_G0270738 OS=Dictyostelium discoideum (Slime mold) PE=3 SV=2	Z	Cytoskeleton	PREDICTED: mitochondrial inner membrane protease ATP23 homolog [Aplysia californica]
F01.PB15115	--	--	Molecular Function: motor activity (GO:0003774);; Molecular Function: ATP binding (GO:0005524);; Cellular Component: myosin complex (GO:0016459);; Molecular Function: actin filament binding (GO:0051015);;	K10352|0|nvi:100123633|Mhc1; myosin heavy chain, muscle; K10352 myosin heavy chain (A)	--	[Z]	Cytoskeleton	Myosin tail;; Tropomyosin;; Intermediate filament protein	Myosin heavy chain, striated muscle OS=Argopecten irradians (Bay scallop) PE=1 SV=1	Z	Cytoskeleton	PREDICTED: myosin heavy chain, striated muscle-like [Aplysia californica]
F01.PB20479	--	--	--	K11997|2.14855e-07|bfo:BRAFLDRAFT_205327|hypothetical protein; K11997 tripartite motif-containing protein 2/3 (A)	--	--	--	NHL repeat	--	S	Function unknown	Tripartite motif-containing protein 56 [Crassostrea gigas]
F01.PB9999	--	--	--	--	--	[X]	--	BAT2 N-terminus	--	S	Function unknown	PREDICTED: protein PRRC2C-like isoform X3 [Aplysia californica]
F01.PB7109	[K]	Transcription	Cellular Component: nucleus (GO:0005634);; Biological Process: regulation of transcription, DNA-templated (GO:0006355);;	K12605|1.07603e-101|acs:100555353|cnot2; CCR4-NOT transcription complex, subunit 2; K12605 CCR4-NOT transcription complex subunit 2 (A)	ko03018:RNA degradation	[KDR]	--	NOT2 / NOT3 / NOT5 family	Regulator of gene activity GN=Rga OS=Drosophila melanogaster (Fruit fly) PE=1 SV=2	K	Transcription	CCR4-NOT transcription complex subunit 2 [Pinctada fucata]
F01.PB17073	--	--	--	K18411|2.94652e-136|lgi:LOTGIDRAFT_158312|hypothetical protein; K18411 protein maelstrom (A)	--	--	--	piRNA pathway germ-plasm component;; HMG-box domain;; HMG (high mobility group) box	Protein maelstrom homolog GN=mael OS=Aedes aegypti (Yellowfever mosquito) PE=3 SV=1	K	Transcription	hypothetical protein LOTGIDRAFT_158312 [Lottia gigantea]
F01.PB16814	--	--	--	--	--	--	--	Stathmin family	--	S	Function unknown	Stathmin [Crassostrea gigas]
F01.PB2183	[J]	Translation, ribosomal structure and biogenesis	Molecular Function: structural constituent of ribosome (GO:0003735);; Cellular Component: ribosome (GO:0005840);; Biological Process: translation (GO:0006412);;	K02925|1.05353e-138|tca:660560|60S ribosomal protein L3; K02925 large subunit ribosomal protein L3e (A)	ko03010:Ribosome	[J]	Translation, ribosomal structure and biogenesis	Ribosomal protein L3;; Ribosomal protein L3	60S ribosomal protein L3 GN=RpL3 OS=Drosophila melanogaster (Fruit fly) PE=1 SV=3	J	Translation, ribosomal structure and biogenesis	hypothetical protein Y032_0371g113, partial [Ancylostoma ceylanicum]
F01.PB20870	--	--	--	--	--	--	--	--	Uncharacterized SDCCAG3 family protein GN=DDB_G0286065 OS=Dictyostelium discoideum (Slime mold) PE=3 SV=1	S	Function unknown	Serologically defined colon cancer antigen 3-like protein [Crassostrea gigas]
F01.PB1632	--	--	--	K17424|1.59385e-54|lgi:LOTGIDRAFT_150592|hypothetical protein; K17424 large subunit ribosomal protein L43 (A)	--	[J]	Translation, ribosomal structure and biogenesis	Mitochondrial ribosomal protein L51 / S25 / CI-B8 domain	--	S	Function unknown	hypothetical protein CAPTEDRAFT_153190 [Capitella teleta]
F01.PB22472	[Q]	Secondary metabolites biosynthesis, transport and catabolism	Molecular Function: oxidoreductase activity (GO:0016491);;	--	--	[Q]	Secondary metabolites biosynthesis, transport and catabolism	--	Cytochrome P450 18a1 GN=Cyp18a1 OS=Drosophila melanogaster (Fruit fly) PE=2 SV=2	Q	Secondary metabolites biosynthesis, transport and catabolism	hypothetical protein LOTGIDRAFT_180305 [Lottia gigantea]
F01.PB19015	[GEPR]	--	--	--	--	[G]	Carbohydrate transport and metabolism	Major Facilitator Superfamily	--	E	Amino acid transport and metabolism	hypothetical protein LOTGIDRAFT_231273 [Lottia gigantea]
F01.PB19395	[J]	Translation, ribosomal structure and biogenesis	Molecular Function: nucleic acid binding (GO:0003676);;	--	--	[J]	Translation, ribosomal structure and biogenesis	Telomere recombination	--	J	Translation, ribosomal structure and biogenesis	PREDICTED: yrdC domain-containing protein, mitochondrial-like [Aplysia californica]
F01.PB12129	[J]	Translation, ribosomal structure and biogenesis	Molecular Function: arginine-tRNA ligase activity (GO:0004814);; Molecular Function: ATP binding (GO:0005524);; Cellular Component: cytoplasm (GO:0005737);; Biological Process: arginyl-tRNA aminoacylation (GO:0006420);;	K01887|0|lgi:LOTGIDRAFT_196660|hypothetical protein; K01887 arginyl-tRNA synthetase [EC:6.1.1.19] (A)	ko00970:Aminoacyl-tRNA biosynthesis	[J]	Translation, ribosomal structure and biogenesis	tRNA synthetases class I (R);; Arginyl tRNA synthetase N terminal domain;; tRNA synthetases class I (R);; DALR anticodon binding domain	Probable arginine--tRNA ligase, cytoplasmic GN=Aats-arg OS=Drosophila melanogaster (Fruit fly) PE=2 SV=1	J	Translation, ribosomal structure and biogenesis	hypothetical protein LOTGIDRAFT_196660 [Lottia gigantea]
F01.PB10236	--	--	--	--	--	--	--	TMC domain	Transmembrane channel-like protein 2 GN=tmc-2 OS=Caenorhabditis elegans PE=1 SV=2	U	Intracellular trafficking, secretion, and vesicular transport	Enolase [Crassostrea gigas]
F01.PB17834	[Z]	Cytoskeleton	Biological Process: cytokinesis (GO:0000910);; Molecular Function: GTPase activity (GO:0003924);; Molecular Function: structural constituent of cytoskeleton (GO:0005200);; Molecular Function: GTP binding (GO:0005525);; Cellular Component: lipid particle (GO:0005811);; Cellular Component: microtubule (GO:0005874);; Biological Process: GTP catabolic process (GO:0006184);; Biological Process: microt…	K07374|2.63758e-156|xma:102217094|tubulin alpha-1A chain-like; K07374 tubulin alpha (A)	ko04145:Phagosome;ko04540:Gap junction	[Z]	Cytoskeleton	Tubulin/FtsZ family, GTPase domain	Tubulin alpha-3 chain GN=alphaTub84D OS=Drosophila melanogaster (Fruit fly) PE=2 SV=1	Z	Cytoskeleton	alpha tubulin [Glossina morsitans morsitans]
F01.PB11798	--	--	--	--	--	--	--	--	--	S	Function unknown	PREDICTED: uncharacterized protein LOC101744346 [Bombyx mori]
F01.PB2465	--	--	--	K13129|2.26398e-14|lgi:LOTGIDRAFT_234254|hypothetical protein; K13129 survival motor neuron protein (A)	ko03013:RNA transport	[A]	RNA processing and modification	Survival motor neuron protein (SMN)	--	S	Function unknown	Survival motor neuron protein [Crassostrea gigas]
F01.PB10491	--	--	--	--	--	--	--	--	--	S	Function unknown	hypothetical protein CAPTEDRAFT_213040 [Capitella teleta]
F01.PB2814	--	--	Molecular Function: structural molecule activity (GO:0005198);;	--	--	[U]	Intracellular trafficking, secretion, and vesicular transport	MSP (Major sperm protein) domain	--	U	Intracellular trafficking, secretion, and vesicular transport	PREDICTED: motile sperm domain-containing protein 1-like [Strongylocentrotus purpuratus]
F01.PB15165	[H]	Coenzyme transport and metabolism	Molecular Function: catalytic activity (GO:0003824);; Molecular Function: binding (GO:0005488);;	K10699|0|lgi:LOTGIDRAFT_232383|hypothetical protein; K10699 ubiquitin-activating enzyme E1-like protein 2 [EC:6.3.2.19] (A)	ko04120:Ubiquitin mediated proteolysis	[O]	Posttranslational modification, protein turnover, chaperones	ThiF family;; Ubiquitin-activating enzyme active site;; Repeat in ubiquitin-activating (UBA) protein;; ThiF family;; Ubiquitin-activating enzyme e1 C-terminal domain	Ubiquitin-like modifier-activating enzyme 1 GN=uba1 OS=Dictyostelium discoideum (Slime mold) PE=3 SV=1	H	Coenzyme transport and metabolism	PREDICTED: ubiquitin-like modifier-activating enzyme 6-like [Saccoglossus kowalevskii]
F01.PB2068	--	--	--	--	--	[ET]	--	PRA1 family protein;; PRA1 family protein	--	U	Intracellular trafficking, secretion, and vesicular transport	hypothetical protein LOTGIDRAFT_188561 [Lottia gigantea]
F01.PB14125	--	--	Molecular Function: peptidase activity, acting on L-amino acid peptides (GO:0070011);;	K01283|3.03949e-140|lgi:LOTGIDRAFT_118685|hypothetical protein; K01283 peptidyl-dipeptidase A [EC:3.4.15.1] (A)	--	[E]	Amino acid transport and metabolism	Angiotensin-converting enzyme;; Angiotensin-converting enzyme;; Angiotensin-converting enzyme;; Angiotensin-converting enzyme	Angiotensin-converting enzyme (Precursor) GN=ACE OS=Theromyzon tessulatum (Duck leech) PE=2 SV=1	S	Function unknown	Angiotensin-converting enzyme [Crassostrea gigas]
F01.PB3889	--	--	--	--	--	[C]	Energy production and conversion	--	--	C	Energy production and conversion	--
F01.PB9440	[HC]	--	Molecular Function: cytochrome-b5 reductase activity, acting on NAD(P)H (GO:0004128);; Biological Process: oxidation-reduction process (GO:0055114);;	K00326|8.09586e-120|bfo:BRAFLDRAFT_120433|hypothetical protein; K00326 cytochrome-b5 reductase [EC:1.6.2.2] (A)	ko00520:Amino sugar and nucleotide sugar metabolism	[HC]	--	Oxidoreductase FAD-binding domain;; Oxidoreductase NAD-binding domain	NADH-cytochrome b5 reductase 1 GN=cyb5r1 OS=Dictyostelium discoideum (Slime mold) PE=3 SV=1	C	Energy production and conversion	NADH-cytochrome b5 reductase 2 [Crassostrea gigas]
F01.PB12337	--	--	--	--	--	[TU]	--	C2 domain	Synaptotagmin-1 GN=SYT1 OS=Aplysia californica (California sea hare) PE=1 SV=2	S	Function unknown	Synaptotagmin-C [Crassostrea gigas]
F01.PB20697	[J]	Translation, ribosomal structure and biogenesis	Molecular Function: structural constituent of ribosome (GO:0003735);; Cellular Component: ribosome (GO:0005840);; Biological Process: translation (GO:0006412);;	K02976|1.81867e-34|lgi:LOTGIDRAFT_138823|hypothetical protein; K02976 small subunit ribosomal protein S26e (A)	ko03010:Ribosome	[J]	Translation, ribosomal structure and biogenesis	Ribosomal protein S26e	40S ribosomal protein S26 GN=RPS26 OS=Octopus vulgaris (Common octopus) PE=2 SV=1	J	Translation, ribosomal structure and biogenesis	RecName: Full=40S ribosomal protein S26 [Octopus vulgaris]
F01.PB6746	[E]	Amino acid transport and metabolism	Molecular Function: glutamate-ammonia ligase activity (GO:0004356);; Biological Process: glutamine biosynthetic process (GO:0006542);;	K01915|0|lgi:LOTGIDRAFT_230064|hypothetical protein; K01915 glutamine synthetase [EC:6.3.1.2] (A)	ko00250:Alanine, aspartate and glutamate metabolism;ko00330:Arginine and proline metabolism;ko00630:Glyoxylate and dicarboxylate metabolism;ko00910:Nitrogen metabolism;ko01230:Biosynthesis of amino acids	[E]	Amino acid transport and metabolism	Glutamine synthetase, catalytic domain;; Glutamine synthetase, beta-Grasp domain	Glutamine synthetase 2 cytoplasmic GN=Gs2 OS=Drosophila melanogaster (Fruit fly) PE=2 SV=3	E	Amino acid transport and metabolism	Glutamine synthetase [Crassostrea gigas]
F01.PB2961	[S]	Function unknown	--	K13115|4.15672e-132|lgi:LOTGIDRAFT_161207|hypothetical protein; K13115 coiled-coil domain-containing protein 130 (A)	--	[S]	Function unknown	Family of unknown function (DUF572)	Coiled-coil domain-containing protein 130 homolog GN=CG15084 OS=Drosophila melanogaster (Fruit fly) PE=2 SV=1	S	Function unknown	hypothetical protein LOTGIDRAFT_161207 [Lottia gigantea]
F01.PB15292	--	--	--	--	--	--	--	B-box zinc finger	--	--	--	Tripartite motif-containing protein 56 [Crassostrea gigas]
F01.PB19076	--	--	--	--	--	--	--	PMP-22/EMP/MP20/Claudin tight junction;; PMP-22/EMP/MP20/Claudin family	--	S	Function unknown	PREDICTED: uncharacterized protein LOC101853410 [Aplysia californica]
F01.PB11540	[O]	Posttranslational modification, protein turnover, chaperones	--	--	--	[O]	Posttranslational modification, protein turnover, chaperones	Hsp70 protein	Heat shock protein 70 B2 GN=HSP70B2 OS=Anopheles albimanus (New world malaria mosquito) PE=3 SV=1	O	Posttranslational modification, protein turnover, chaperones	Heat shock 70 kDa protein 12A [Crassostrea gigas]
F01.PB12342	--	--	Biological Process: proteolysis (GO:0006508);; Molecular Function: cysteine-type peptidase activity (GO:0008234);;	--	--	[O]	Posttranslational modification, protein turnover, chaperones	Papain family cysteine protease;; Cathepsin propeptide inhibitor domain (I29)	Cathepsin L light chain (Precursor) GN=Cp1 OS=Drosophila melanogaster (Fruit fly) PE=2 SV=2	O	Posttranslational modification, protein turnover, chaperones	cathepsin L3 [Sinonovacula constricta]
F01.PB195	[J]	Translation, ribosomal structure and biogenesis	Molecular Function: structural constituent of ribosome (GO:0003735);; Cellular Component: ribosome (GO:0005840);; Biological Process: translation (GO:0006412);;	K02870|3.8946e-69|api:100144916|Rpl12; ribosomal protein L12; K02870 large subunit ribosomal protein L12e (A)	ko03010:Ribosome	[J]	Translation, ribosomal structure and biogenesis	--	60S ribosomal protein L12 GN=rpl-12 OS=Caenorhabditis elegans PE=3 SV=1	J	Translation, ribosomal structure and biogenesis	60S ribosomal protein L12 [Strongyloides ratti]
F01.PB16322	[C]	Energy production and conversion	--	--	--	[C]	Energy production and conversion	Aldo/keto reductase family	Aldo-keto reductase (Fragment) OS=Babesia bovis PE=2 SV=1	C	Energy production and conversion	hypothetical protein LOTGIDRAFT_237410 [Lottia gigantea]
F01.PB19053	--	--	--	--	--	--	--	Thrombospondin type 1 domain;; Low-density lipoprotein receptor domain class A	Mucin-like protein {ECO:0000303|PubMed:23765379} (Fragment) OS=Acropora millepora (Staghorn coral) PE=1 SV=1	S	Function unknown	Hemicentin-1 [Crassostrea gigas]
F01.PB20866	--	--	--	--	--	[S]	Function unknown	Domain of unknown function (DUF1741)	--	S	Function unknown	hypothetical protein LOTGIDRAFT_142382, partial [Lottia gigantea]
F01.PB3322	--	--	Cellular Component: mitochondrion (GO:0005739);; Biological Process: transport (GO:0006810);; Cellular Component: membrane (GO:0016020);;	K17781|5.2255e-20|bfo:BRAFLDRAFT_60179|hypothetical protein; K17781 mitochondrial import inner membrane translocase subunit TIM13 (A)	--	[U]	Intracellular trafficking, secretion, and vesicular transport	Tim10/DDP family zinc finger	Mitochondrial import inner membrane translocase subunit Tim13 GN=Tim13 OS=Drosophila melanogaster (Fruit fly) PE=3 SV=1	O	Posttranslational modification, protein turnover, chaperones	Mitochondrial import inner membrane translocase subunit Tim13-B [Crassostrea gigas]
F01.PB15027	--	--	--	--	--	[R]	General function prediction only	BTB/POZ domain	Uncharacterized protein T23G5.3 GN=T23G5.3 OS=Caenorhabditis elegans PE=3 SV=3	S	Function unknown	BTB/POZ domain-containing protein KCTD7 [Crassostrea gigas]
F01.PB22620	--	--	--	--	--	--	--	von Willebrand factor type C domain;; von Willebrand factor type C domain	--	--	--	Collagen alpha-4(VI) chain [Crassostrea gigas]
F01.PB12990	--	--	--	--	--	--	--	Thrombospondin type 1 domain	--	S	Function unknown	RPE-spondin [Crassostrea gigas]
F01.PB18739	--	--	Biological Process: vesicle-mediated transport (GO:0016192);; Cellular Component: membrane coat (GO:0030117);; Biological Process: intracellular transport (GO:0046907);;	--	--	[U]	Intracellular trafficking, secretion, and vesicular transport	Adaptor complexes medium subunit family	Probable coatomer subunit delta GN=C13B9.3 OS=Caenorhabditis elegans PE=3 SV=1	U	Intracellular trafficking, secretion, and vesicular transport	Coatomer subunit delta [Crassostrea gigas]
F01.PB20835	--	--	--	--	--	[T]	Signal transduction mechanisms	GCC2 and GCC3;; Thrombospondin type 1 domain;; EGF-like domain	Protein eyes shut OS=Drosophila melanogaster (Fruit fly) PE=1 SV=1	S	Function unknown	Sushi repeat-containing protein SRPX2 [Crassostrea gigas]
F01.PB11942	[R]	General function prediction only	Cellular Component: nucleus (GO:0005634);; Biological Process: rRNA processing (GO:0006364);;	K14824|0|lgi:LOTGIDRAFT_114705|hypothetical protein; K14824 ribosome biogenesis protein ERB1 (A)	--	[J]	Translation, ribosomal structure and biogenesis	BOP1NT (NUC169) domain;; WD domain, G-beta repeat;; WD domain, G-beta repeat	Ribosome biogenesis protein BOP1 homolog {ECO:0000255|HAMAP-Rule:MF_03027} GN=AAEL001169 OS=Aedes aegypti (Yellowfever mosquito) PE=3 SV=1	J	Translation, ribosomal structure and biogenesis	Ribosome biogenesis protein bop1 [Crassostrea gigas]
F01.PB15697	[P]	Inorganic ion transport and metabolism	Molecular Function: catalytic activity (GO:0003824);;	K00597|0|spu:581957|methionine synthase reductase-like; K00597 methionine synthase reductase [EC:1.16.1.8] (A)	--	[C]	Energy production and conversion	FAD binding domain;; Flavodoxin;; Oxidoreductase NAD-binding domain	Putative methionine synthase reductase GN=tag-165 OS=Caenorhabditis elegans PE=3 SV=1	P	Inorganic ion transport and metabolism	PREDICTED: methionine synthase reductase-like [Strongylocentrotus purpuratus]
F01.PB7384	--	--	--	--	--	--	--	Normal lung function maintenance, Low in Lung Cancer 1 protein	--	S	Function unknown	Uncharacterized protein C2orf50 [Crassostrea gigas]
F01.PB16144	[O]	Posttranslational modification, protein turnover, chaperones	--	K05633|1.91781e-12|amj:102576998|WWP1; WW domain containing E3 ubiquitin protein ligase 1; K05633 atrophin-1 interacting protein 5 (WW domain containing E3 ubiquitin protein ligase 1) [EC:6.3.2.19] (A)	ko04120:Ubiquitin mediated proteolysis;ko04144:Endocytosis	[O]	Posttranslational modification, protein turnover, chaperones	WW domain;; B-box zinc finger	E3 ubiquitin-protein ligase Su(dx) GN=Su(dx) OS=Drosophila melanogaster (Fruit fly) PE=1 SV=1	O	Posttranslational modification, protein turnover, chaperones	Tripartite motif-containing protein 45 [Crassostrea gigas]
F01.PB12978	[U]	Intracellular trafficking, secretion, and vesicular transport	Cellular Component: integral component of membrane (GO:0016021);; Biological Process: vesicle-mediated transport (GO:0016192);;	K08517|6.26183e-94|lgi:LOTGIDRAFT_231136|hypothetical protein; K08517 vesicle transport protein SEC22 (A)	ko04130:SNARE interactions in vesicular transport;ko04145:Phagosome	[U]	Intracellular trafficking, secretion, and vesicular transport	Regulated-SNARE-like domain;; Synaptobrevin	Vesicle-associated membrane protein 7B OS=Dictyostelium discoideum (Slime mold) PE=3 SV=1	U	Intracellular trafficking, secretion, and vesicular transport	PREDICTED: vesicle-trafficking protein SEC22b-like [Aplysia californica]
F01.PB15830	--	--	--	--	--	--	--	--	--	S	Function unknown	hypothetical protein Y032_0153g2941 [Ancylostoma ceylanicum]
F01.PB17359	--	--	--	--	--	--	--	MAC/Perforin domain	--	U	Intracellular trafficking, secretion, and vesicular transport	macrophage expressed protein [Haliotis rufescens]
F01.PB15420	--	--	--	K18179|2.77639e-10|mze:101475621|cytochrome c oxidase assembly factor 6 homolog; K18179 cytochrome c oxidase assembly factor 6 (A)	--	[C]	Energy production and conversion	Cytochrome oxidase c subunit VIb	--	O	Posttranslational modification, protein turnover, chaperones	cytochrome C oxidase, subunit VIb/COX12, putative [Ixodes scapularis]
F01.PB4247	[Z]	Cytoskeleton	Molecular Function: GTPase activity (GO:0003924);; Molecular Function: structural constituent of cytoskeleton (GO:0005200);; Molecular Function: ATP binding (GO:0005524);; Molecular Function: GTP binding (GO:0005525);; Cellular Component: cytoplasm (GO:0005737);; Cellular Component: microtubule (GO:0005874);; Biological Process: GTP catabolic process (GO:0006184);; Biological Process: ATP catabol…	K07374|0|dpe:Dper_GL12416|GL12416 gene product from transcript GL12416-RA; K07374 tubulin alpha (A)	ko04145:Phagosome	[Z]	Cytoskeleton	Tubulin C-terminal domain;; Tubulin/FtsZ family, GTPase domain	Tubulin alpha-1 chain GN=alphaTub84B OS=Drosophila melanogaster (Fruit fly) PE=2 SV=1	Z	Cytoskeleton	GL12416 [Drosophila persimilis]
F01.PB8141	--	--	--	--	--	[S]	Function unknown	Cysteine-rich secretory protein family	Cysteine-rich venom protein Mr30 (Precursor) OS=Conus marmoreus (Marble cone) PE=1 SV=1	S	Function unknown	Cysteine-rich secretory protein Mr30 [Crassostrea gigas]
F01.PB11291	--	--	--	--	--	[R]	General function prediction only	Arrestin (or S-antigen), N-terminal domain;; Arrestin (or S-antigen), C-terminal domain	Arrestin domain-containing protein 15 GN=arrd-15 OS=Caenorhabditis elegans PE=3 SV=2	S	Function unknown	hypothetical protein LOTGIDRAFT_211804 [Lottia gigantea]
F01.PB4443	--	--	--	--	--	--	--	--	--	S	Function unknown	PREDICTED: uncharacterized protein LOC101242368 [Ciona intestinalis]
F01.PB1754	--	--	--	--	--	--	--	Multi-glycosylated core protein 24 (MGC-24)	--	--	--	--
F01.PB2654	--	--	--	--	--	[S]	Function unknown	Domain of Unknown Function (DUF1907);; Domain of Unknown Function (DUF1907)	--	S	Function unknown	Ester hydrolase C11orf54-like protein [Crassostrea gigas]
F01.PB22394	--	--	Biological Process: sulfate assimilation (GO:0000103);; Molecular Function: adenylylsulfate kinase activity (GO:0004020);; Molecular Function: sulfate adenylyltransferase (ATP) activity (GO:0004781);; Molecular Function: ATP binding (GO:0005524);; Biological Process: phosphorylation (GO:0016310);;	K13811|0|lgi:LOTGIDRAFT_230274|hypothetical protein; K13811 3'-phosphoadenosine 5'-phosphosulfate synthase [EC:2.7.7.4 2.7.1.25] (A)	ko00230:Purine metabolism;ko00450:Selenocompound metabolism;ko00920:Sulfur metabolism	[F]	Nucleotide transport and metabolism	Adenylylsulphate kinase;; ATP-sulfurylase;; PUA-like domain;; AAA domain;; AAA domain;; AAA domain	Adenylyl-sulfate kinase OS=Urechis caupo (Innkeeper worm) PE=2 SV=1	P	Inorganic ion transport and metabolism	Bifunctional 3&apos;-phosphoadenosine 5&apos;-phosphosulfate synthetase [Crassostrea gigas]
F01.PB13372	[L]	Replication, recombination and repair	Molecular Function: nucleic acid binding (GO:0003676);; Molecular Function: ATP binding (GO:0005524);; Molecular Function: ATP-dependent helicase activity (GO:0008026);;	K12598|0|amj:102557938|SKIV2L2; superkiller viralicidic activity 2-like 2 (S. cerevisiae); K12598 ATP-dependent RNA helicase DOB1 [EC:3.6.4.13] (A)	ko03018:RNA degradation	[A]	RNA processing and modification	rRNA-processing arch domain;; DSHCT (NUC185) domain;; Helicase conserved C-terminal domain;; DEAD/DEAH box helicase;; DEAD/DEAH box helicase	mRNA transport homolog 4 GN=mtr-4 OS=Caenorhabditis elegans PE=3 SV=1	L	Replication, recombination and repair	Superkiller viralicidic activity 2-like 2 [Crassostrea gigas]
F01.PB2373	--	--	Molecular Function: metal ion binding (GO:0046872);;	K00522|1.382e-39|dre:436651|cb141, fj01a11, fj24b11, fth, sb:cb141, wu:fj01a11, wu:fj24b11; zgc:92066 (EC:1.16.3.1); K00522 ferritin heavy chain [EC:1.16.3.2] (A)	--	[P]	Inorganic ion transport and metabolism	Ferritin-like domain	Soma ferritin OS=Lymnaea stagnalis (Great pond snail) PE=2 SV=2	P	Inorganic ion transport and metabolism	ferritin 3 [Ruditapes decussatus]
F01.PB11427	[K]	Transcription	Molecular Function: nucleic acid binding (GO:0003676);; Cellular Component: ribonucleoprotein complex (GO:0030529);;	K11087|3.01208e-35|aag:AaeL_AAEL001382|small nuclear ribonucleoprotein sm d1; K11087 small nuclear ribonucleoprotein D1 (A)	ko03040:Spliceosome	[A]	RNA processing and modification	LSM domain	Probable small nuclear ribonucleoprotein Sm D1 GN=SmD1 OS=Drosophila melanogaster (Fruit fly) PE=1 SV=1	K	Transcription	small nuclear ribonucleoprotein sm d1 [Aedes aegypti]
F01.PB2382	[R]	General function prediction only	--	--	--	[R]	General function prediction only	50S ribosome-binding GTPase;; Elongation factor Tu GTP binding domain;; Ras family	--	S	Function unknown	hypothetical protein LOTGIDRAFT_124576 [Lottia gigantea]
F01.PB12596	--	--	--	--	--	--	--	--	--	S	Function unknown	Uncharacterized protein C7orf63 [Crassostrea gigas]
F01.PB2427	[O]	Posttranslational modification, protein turnover, chaperones	--	K17286|5.4556e-62|lgi:LOTGIDRAFT_214616|hypothetical protein; K17286 erythrocyte band 7 integral membrane protein (A)	--	[C]	Energy production and conversion	SPFH domain / Band 7 family	Stomatin-2 GN=sto-2 OS=Caenorhabditis elegans PE=3 SV=4	O	Posttranslational modification, protein turnover, chaperones	hypothetical protein LOTGIDRAFT_214616 [Lottia gigantea]
F01.PB13230	--	--	--	K14801|1.21436e-49|lcm:102367374|PDCD2L; programmed cell death 2-like; K14801 pre-rRNA-processing protein TSR4 (A)	--	[R]	General function prediction only	Programmed cell death protein 2, C-terminal putative domain	--	S	Function unknown	Programmed cell death protein 2-like protein [Crassostrea gigas]
F01.PB8619	--	--	--	--	--	[S]	Function unknown	Polysaccharide biosynthesis	--	S	Function unknown	PREDICTED: protein PBDC1 isoform X1 [Microplitis demolitor]
F01.PB4094	--	--	--	--	--	--	--	--	--	--	--	clam ADP-ribosylating protein CARP-1 [Meretrix lamarckii]
F01.PB7237	[T]	Signal transduction mechanisms	--	--	--	--	--	Universal stress protein family	--	T	Signal transduction mechanisms	hypothetical protein LOTGIDRAFT_166166 [Lottia gigantea]
F01.PB1343	[O]	Posttranslational modification, protein turnover, chaperones	Cellular Component: proteasome complex (GO:0000502);; Molecular Function: endopeptidase activity (GO:0004175);; Biological Process: proteolysis (GO:0006508);;	K02736|5.63515e-119|lgi:LOTGIDRAFT_230810|hypothetical protein; K02736 20S proteasome subunit beta 7 [EC:3.4.25.1] (A)	ko03050:Proteasome	[O]	Posttranslational modification, protein turnover, chaperones	Proteasome subunit	Proteasome subunit beta type-4 GN=Prosbeta7 OS=Drosophila melanogaster (Fruit fly) PE=2 SV=1	O	Posttranslational modification, protein turnover, chaperones	hypothetical protein LOTGIDRAFT_230810 [Lottia gigantea]
F01.PB12890	--	--	--	K14964|6.89703e-176|lgi:LOTGIDRAFT_218660|hypothetical protein; K14964 Set1/Ash2 histone methyltransferase complex subunit ASH2 (A)	--	[BK]	--	SPRY domain	Set1/Ash2 histone methyltransferase complex subunit ASH2 {ECO:0000303|PubMed:21694722} OS=Drosophila melanogaster (Fruit fly) PE=1 SV=2	S	Function unknown	hypothetical protein LOTGIDRAFT_218660 [Lottia gigantea]
F01.PB6673	[Z]	Cytoskeleton	Molecular Function: GTPase activity (GO:0003924);; Molecular Function: structural constituent of cytoskeleton (GO:0005200);; Molecular Function: GTP binding (GO:0005525);; Cellular Component: cytoplasm (GO:0005737);; Cellular Component: microtubule (GO:0005874);; Biological Process: GTP catabolic process (GO:0006184);; Biological Process: microtubule-based process (GO:0007017);; Biological Proces…	K07375|8.35399e-142|isc:IscW_ISCW018899|alpha tubulin, putative; K07375 tubulin beta (A)	ko04145:Phagosome	[Z]	Cytoskeleton	Tubulin C-terminal domain;; Tubulin/FtsZ family, GTPase domain;; Misato Segment II tubulin-like domain	Tubulin beta chain (Fragment) OS=Strongylocentrotus purpuratus (Purple sea urchin) PE=2 SV=1	Z	Cytoskeleton	Protein CBR-TBB-4 [Caenorhabditis briggsae]
F01.PB22066	[S]	Function unknown	--	K09935|7.28417e-49|lgi:LOTGIDRAFT_220498|hypothetical protein; K09935 hypothetical protein (A)	--	--	--	Domain of unknown function (DUF1768)	--	S	Function unknown	hypothetical protein LOTGIDRAFT_220498 [Lottia gigantea]
F01.PB10711	--	--	--	--	--	--	--	--	--	--	--	hypothetical protein LOTGIDRAFT_165489 [Lottia gigantea]
F01.PB6882	--	--	--	K02892|4.5622e-24|lgi:LOTGIDRAFT_119560|hypothetical protein; K02892 large subunit ribosomal protein L23 (A)	ko03010:Ribosome	[J]	Translation, ribosomal structure and biogenesis	Ribosomal protein L23	Probable 39S ribosomal protein L23, mitochondrial GN=mRpL23 OS=Anopheles gambiae (African malaria mosquito) PE=3 SV=1	J	Translation, ribosomal structure and biogenesis	PREDICTED: 39S ribosomal protein L23, mitochondrial-like [Aplysia californica]
F01.PB4788	--	--	--	--	--	--	--	Tctex-1 family	--	S	Function unknown	Tctex1 domain-containing protein 1 [Crassostrea gigas]
F01.PB10592	--	--	--	--	--	[A]	RNA processing and modification	Methyltransferase domain	--	S	Function unknown	hypothetical protein BRAFLDRAFT_74144 [Branchiostoma floridae]
F01.PB236	--	--	--	--	--	--	--	--	--	--	--	hypothetical protein CGI_10011116 [Crassostrea gigas]
F01.PB17423	[Q]	Secondary metabolites biosynthesis, transport and catabolism	Molecular Function: catalytic activity (GO:0003824);;	K01557|3.59269e-51|lgi:LOTGIDRAFT_190107|hypothetical protein; K01557 acylpyruvate hydrolase [EC:3.7.1.5] (A)	ko00350:Tyrosine metabolism	[R]	General function prediction only	Fumarylacetoacetate (FAA) hydrolase family;; Fumarylacetoacetate (FAA) hydrolase family	Acylpyruvase FAHD1, mitochondrial (Precursor) GN=fahd1 OS=Dictyostelium discoideum (Slime mold) PE=3 SV=1	Q	Secondary metabolites biosynthesis, transport and catabolism	Fumarylacetoacetate hydrolase domain-containing protein 1 [Crassostrea gigas]
F01.PB488	--	--	--	--	--	--	--	C1q domain	--	--	--	sialic acid-binding lectin [Ruditapes philippinarum]
F01.PB1694	--	--	--	--	--	[TV]	--	Lectin C-type domain	--	O	Posttranslational modification, protein turnover, chaperones	C-type lectin [Littorina littorea]
F01.PB16817	[GEPR]	--	Molecular Function: transporter activity (GO:0005215);;	K08149|2.47312e-67|bfo:BRAFLDRAFT_67586|hypothetical protein; K08149 MFS transporter, SP family, solute carrier family 2 (facilitated glucose transporter), member 12 (A)	--	[R]	General function prediction only	Sugar (and other) transporter;; Sugar (and other) transporter;; Sugar (and other) transporter	Facilitated trehalose transporter Tret1 {ECO:0000250|UniProtKB:Q7PIR5} OS=Aedes aegypti (Yellowfever mosquito) PE=3 SV=1	G	Carbohydrate transport and metabolism	Solute carrier family 2, facilitated glucose transporter member 12 [Crassostrea gigas]
F01.PB2097	[IQR]	--	--	--	--	[R]	General function prediction only	short chain dehydrogenase;; short chain dehydrogenase;; Enoyl-(Acyl carrier protein) reductase	3-hydroxyacyl-CoA dehydrogenase GN=mfeA OS=Dictyostelium discoideum (Slime mold) PE=2 SV=1	C	Energy production and conversion	hypothetical protein CAPTEDRAFT_182185 [Capitella teleta]
F01.PB22203	--	--	--	--	--	[S]	Function unknown	Cadherin domain	Cadherin-89D (Precursor) GN=Cad89D OS=Drosophila melanogaster (Fruit fly) PE=2 SV=3	U	Intracellular trafficking, secretion, and vesicular transport	hypothetical protein LOTGIDRAFT_156564 [Lottia gigantea]
F01.PB5292	--	--	--	K11997|1.82586e-09|nve:NEMVE_v1g198897|hypothetical protein; K11997 tripartite motif-containing protein 2/3 (A)	--	[O]	Posttranslational modification, protein turnover, chaperones	B-box zinc finger	--	S	Function unknown	Tripartite motif-containing protein 45 [Crassostrea gigas]
F01.PB15961	--	--	--	--	--	--	--	Caspase domain	--	--	--	--
F01.PB15701	--	--	--	K10481|0|lgi:LOTGIDRAFT_220364|hypothetical protein; K10481 BTB/POZ domain-containing protein 9 (A)	--	[R]	General function prediction only	BTB/POZ domain;; BTB And C-terminal Kelch;; F5/8 type C domain	Kelch-like protein diablo {ECO:0000250|UniProtKB:Q9VUU5} OS=Aedes aegypti (Yellowfever mosquito) PE=3 SV=1	S	Function unknown	PREDICTED: BTB/POZ domain-containing protein 9-like [Aplysia californica]
F01.PB11804	[J]	Translation, ribosomal structure and biogenesis	--	K01426|4.58765e-59|bfo:BRAFLDRAFT_94568|hypothetical protein; K01426 amidase [EC:3.5.1.4] (A)	ko00330:Arginine and proline metabolism;ko00360:Phenylalanine metabolism;ko00380:Tryptophan metabolism	[J]	Translation, ribosomal structure and biogenesis	Amidase	--	J	Translation, ribosomal structure and biogenesis	hypothetical protein BRAFLDRAFT_94568 [Branchiostoma floridae]
F01.PB13775	[J]	Translation, ribosomal structure and biogenesis	Molecular Function: GTP binding (GO:0005525);;	K06942|4.46428e-169|lgi:LOTGIDRAFT_151663|hypothetical protein; K06942 (A)	--	[R]	General function prediction only	50S ribosome-binding GTPase;; Ferrous iron transport protein B;; Protein of unknown function (DUF933);; TGS domain	Obg-like ATPase 1 {ECO:0000255|HAMAP-Rule:MF_03167} GN=CG1354 OS=Drosophila melanogaster (Fruit fly) PE=1 SV=1	J	Translation, ribosomal structure and biogenesis	Obg-like ATPase 1 [Crassostrea gigas]
F01.PB5171	--	--	--	K17429|8.43201e-32|aga:AgaP_AGAP007507|AGAP007507-PA; K17429 large subunit ribosomal protein L48 (A)	--	[S]	Function unknown	Ribosomal protein S10p/S20e	--	S	Function unknown	hypothetical protein CAPTEDRAFT_178197 [Capitella teleta]
F01.PB19388	--	--	--	K11997|1.17066e-13|bfo:BRAFLDRAFT_93989|hypothetical protein; K11997 tripartite motif-containing protein 2/3 (A)	--	[O]	Posttranslational modification, protein turnover, chaperones	B-box zinc finger;; PQQ-like domain	--	S	Function unknown	Tripartite motif-containing protein 56 [Crassostrea gigas]
F01.PB20506	--	--	Molecular Function: calcium-transporting ATPase activity (GO:0005388);; Molecular Function: ATP binding (GO:0005524);; Cellular Component: plasma membrane (GO:0005886);; Biological Process: cellular calcium ion homeostasis (GO:0006874);; Cellular Component: integral component of membrane (GO:0016021);; Molecular Function: metal ion binding (GO:0046872);; Biological Process: calcium ion transmembr…	K05850|5.86475e-39|lgi:LOTGIDRAFT_186814|hypothetical protein; K05850 Ca2+ transporting ATPase, plasma membrane [EC:3.6.3.8] (A)	--	[P]	Inorganic ion transport and metabolism	Cation transporter/ATPase, N-terminus;; Nematode insulin-related peptide beta type	--	P	Inorganic ion transport and metabolism	hypothetical protein LOTGIDRAFT_186814 [Lottia gigantea]
F01.PB5474	[R]	General function prediction only	Molecular Function: nucleotide binding (GO:0000166);; Biological Process: protein peptidyl-prolyl isomerization (GO:0000413);; Molecular Function: nucleic acid binding (GO:0003676);; Molecular Function: peptidyl-prolyl cis-trans isomerase activity (GO:0003755);; Biological Process: protein folding (GO:0006457);;	K12735|1.10911e-97|clv:102092731|PPIL4; peptidylprolyl isomerase (cyclophilin)-like 4; K12735 peptidyl-prolyl cis-trans isomerase-like 4 [EC:5.2.1.8] (A)	--	[O]	Posttranslational modification, protein turnover, chaperones	RNA recognition motif. (a.k.a. RRM, RBD, or RNP domain);; RNA recognition motif (a.k.a. RRM, RBD, or RNP domain);; RNA recognition motif. (a.k.a. RRM, RBD, or RNP domain)	U1 small nuclear ribonucleoprotein 70 kDa GN=snrnp70 OS=Dictyostelium discoideum (Slime mold) PE=3 SV=1	O	Posttranslational modification, protein turnover, chaperones	Peptidyl-prolyl cis-trans isomerase-like 4 [Crassostrea gigas]
F01.PB17924	--	--	--	--	--	--	--	--	--	S	Function unknown	hypothetical protein LOTGIDRAFT_174858 [Lottia gigantea]
F01.PB18391	--	--	--	--	--	--	--	Interferon-induced transmembrane protein	--	--	--	PREDICTED: uncharacterized protein LOC101861771 [Aplysia californica]
F01.PB13750	--	--	--	--	--	[R]	General function prediction only	Fibronectin type III domain;; Immunoglobulin I-set domain;; Immunoglobulin domain;; Immunoglobulin domain;; Immunoglobulin V-set domain;; Immunoglobulin domain;; Immunoglobulin domain;; Immunoglobulin I-set domain;; Immunoglobulin V-set domain	--	S	Function unknown	hypothetical protein CGI_10010080 [Crassostrea gigas]
F01.PB13629	[R]	General function prediction only	Molecular Function: transferase activity, transferring acyl groups (GO:0016746);;	K11806|0|lcm:102347896|DCAF13; DDB1 and CUL4 associated factor 13; K11806 WD repeat and SOF domain-containing protein 1 (A)	--	[A]	RNA processing and modification	Sof1-like domain;; WD domain, G-beta repeat;; Eukaryotic translation initiation factor eIF2A	DDB1- and CUL4-associated factor 13 GN=wdsof1 OS=Dictyostelium discoideum (Slime mold) PE=3 SV=1	S	Function unknown	WD repeat and SOF domain-containing protein 1 [Crassostrea gigas]
F01.PB21372	--	--	--	K05325|7.51066e-157|lgi:LOTGIDRAFT_114691|hypothetical protein; K05325 potassium intermediate/small conductance calcium-activated channel subfamily N, invertebrate (A)	--	[P]	Inorganic ion transport and metabolism	Calcium-activated SK potassium channel;; Ion channel	Small conductance calcium-activated potassium channel protein OS=Drosophila melanogaster (Fruit fly) PE=2 SV=2	U	Intracellular trafficking, secretion, and vesicular transport	hypothetical protein LOTGIDRAFT_114691 [Lottia gigantea]
F01.PB22366	--	--	--	K15259|8.43426e-22|cjc:100408181|ZC3HAV1; zinc finger CCCH-type, antiviral 1; K15259 poly [ADP-ribose] polymerase 7/11/12/13 [EC:2.4.2.30] (A)	--	--	--	--	--	S	Function unknown	Poly [ADP-ribose] polymerase 12 [Crassostrea gigas]
F01.PB8017	--	--	--	K12035|8.18964e-09|spu:579482|tripartite motif-containing protein 71-like; K12035 tripartite motif-containing protein 71 [EC:6.3.2.19] (A)	--	[O]	Posttranslational modification, protein turnover, chaperones	B-box zinc finger;; Ubiquitin family	--	S	Function unknown	PREDICTED: tripartite motif-containing protein 71-like [Strongylocentrotus purpuratus]
F01.PB8511	[J]	Translation, ribosomal structure and biogenesis	Molecular Function: GTPase activity (GO:0003924);; Molecular Function: GTP binding (GO:0005525);; Biological Process: GTP catabolic process (GO:0006184);;	--	--	[J]	Translation, ribosomal structure and biogenesis	Elongation factor Tu GTP binding domain;; Elongation factor Tu domain 2;; 50S ribosome-binding GTPase;; Signal recognition particle receptor beta subunit	Elongation factor Tu, mitochondrial GN=TUFA OS=Reclinomonas americana PE=3 SV=1	J	Translation, ribosomal structure and biogenesis	hypothetical protein LOTGIDRAFT_220667 [Lottia gigantea]
F01.PB19591	--	--	--	--	--	[R]	General function prediction only	Armadillo/beta-catenin-like repeat;; Armadillo/beta-catenin-like repeat	--	S	Function unknown	Armadillo repeat-containing protein 8 [Crassostrea gigas]
F01.PB7397	[R]	General function prediction only	Molecular Function: translation elongation factor activity (GO:0003746);; Cellular Component: nucleolus (GO:0005730);; Biological Process: translational elongation (GO:0006414);;	--	--	[S]	Function unknown	Transcription elongation factor Elf1 like	Transcription elongation factor 1 homolog GN=Y54G11A.11 OS=Caenorhabditis elegans PE=3 SV=1	S	Function unknown	Transcription elongation factor 1-like protein, partial [Stegodyphus mimosarum]
F01.PB9321	--	--	--	--	--	--	--	Cadherin domain	--	--	--	Protocadherin Fat 1 [Crassostrea gigas]
F01.PB20623	--	--	--	--	--	--	--	--	--	--	--	predicted protein [Nematostella vectensis]
F01.PB20923	--	--	Molecular Function: motor activity (GO:0003774);; Cellular Component: extracellular region (GO:0005576);; Cellular Component: myofibril (GO:0030016);; Cellular Component: myosin filament (GO:0032982);;	--	--	[Z]	Cytoskeleton	Myosin tail;; Myosin tail	Paramyosin OS=Mytilus galloprovincialis (Mediterranean mussel) PE=2 SV=1	Z	Cytoskeleton	paramyosin-3, partial [Pinctada fucata]
F01.PB19356	--	--	--	--	--	[S]	Function unknown	Leucine Rich repeat;; EF-hand domain pair;; EF hand;; EF-hand domain;; Leucine Rich repeats (2 copies);; EF-hand domain pair;; EF hand	Protein phosphatase 1 regulatory subunit 37 homolog GN=CBG23501 OS=Caenorhabditis briggsae PE=3 SV=1	S	Function unknown	hypothetical protein CGI_10003222 [Crassostrea gigas]
F01.PB5561	--	--	Molecular Function: catalytic activity (GO:0003824);;	--	--	--	--	MAM domain	MAM and LDL-receptor class A domain-containing protein 1 (Fragment) OS=Acropora millepora (Staghorn coral) PE=1 SV=1	--	--	hypothetical protein BRAFLDRAFT_227853 [Branchiostoma floridae]
F01.PB16848	[P]	Inorganic ion transport and metabolism	--	--	--	[P]	Inorganic ion transport and metabolism	Sulfate transporter N-terminal domain with GLY motif;; Sulfate transporter family	Sulfate permease family protein 3 GN=sulp-3 OS=Caenorhabditis elegans PE=2 SV=3	P	Inorganic ion transport and metabolism	Prestin [Crassostrea gigas]
F01.PB18207	--	--	--	--	--	--	--	CRPV capsid protein like	--	--	--	--
F01.PB18250	[M]	Cell wall/membrane/envelope biogenesis	Molecular Function: transferase activity, transferring glycosyl groups (GO:0016757);;	K00729|5.45448e-131|mcf:102136561|ALG5; ALG5, dolichyl-phosphate beta-glucosyltransferase; K00729 dolichyl-phosphate beta-glucosyltransferase [EC:2.4.1.117] (A)	ko00510:N-Glycan biosynthesis	[R]	General function prediction only	Glycosyl transferase family 2;; Glycosyltransferase like family 2;; Glycosyltransferase like family 2	Dolichyl-phosphate beta-glucosyltransferase {ECO:0000250|UniProtKB:Q9Y673} GN=CG7870 OS=Drosophila melanogaster (Fruit fly) PE=1 SV=1	M	Cell wall/membrane/envelope biogenesis	Dolichyl-phosphate beta-glucosyltransferase, partial [Crassostrea gigas]
F01.PB11527	--	--	--	--	--	--	--	--	--	--	--	PREDICTED: uncharacterized protein LOC101851047 [Aplysia californica]
F01.PB7634	[R]	General function prediction only	--	K05038|0|lgi:LOTGIDRAFT_235858|hypothetical protein; K05038 solute carrier family 6 (neurotransmitter transporter, amino acid) member 5/7/9/14 (A)	--	[T]	Signal transduction mechanisms	Sodium:neurotransmitter symporter family	Sodium-dependent serotonin transporter GN=SerT OS=Drosophila melanogaster (Fruit fly) PE=2 SV=1	P	Inorganic ion transport and metabolism	hypothetical protein LOTGIDRAFT_235858 [Lottia gigantea]
F01.PB19719	--	--	--	--	--	[R]	General function prediction only	Reverse transcriptase (RNA-dependent DNA polymerase)	RNA-directed DNA polymerase from mobile element jockey GN=pol OS=Drosophila melanogaster (Fruit fly) PE=1 SV=1	S	Function unknown	PREDICTED: uncharacterized protein LOC102810040 [Saccoglossus kowalevskii]
F01.PB18832	--	--	--	K09849|2.63397e-06|myd:102764568|TRAF5; TNF receptor-associated factor 5; K09849 TNF receptor-associated factor 5 (A)	ko04064:NF-kappa B signaling pathway;ko04668:TNF signaling pathway;ko05168:Herpes simplex infection;ko05169:Epstein-Barr virus infection;ko05200:Pathways in cancer;ko05203:Viral carcinogenesis;ko05222:Small cell lung cancer	[T]	Signal transduction mechanisms	TRAF-type zinc finger;; TIR domain;; TIR domain	TNF receptor-associated factor family protein DDB_G0277243 GN=DDB_G0277243 OS=Dictyostelium discoideum (Slime mold) PE=3 SV=1	S	Function unknown	TNF receptor-associated factor 6 [Crassostrea gigas]
F01.PB20791	[QR]	--	--	--	--	[R]	General function prediction only	Methyltransferase domain;; Methyltransferase domain;; Methyltransferase domain;; Methyltransferase domain;; ubiE/COQ5 methyltransferase family;; Methyltransferase domain;; Methyltransferase domain;; Methyltransferase domain	--	S	Function unknown	Methyltransferase-like protein 7A [Crassostrea gigas]
F01.PB15941	[Q]	Secondary metabolites biosynthesis, transport and catabolism	Molecular Function: fumarylacetoacetase activity (GO:0004334);; Biological Process: aromatic amino acid family metabolic process (GO:0009072);;	K01555|0|tgu:100225499|FAH; fumarylacetoacetate hydrolase (fumarylacetoacetase); K01555 fumarylacetoacetase [EC:3.7.1.2] (A)	ko00350:Tyrosine metabolism	[G]	Carbohydrate transport and metabolism	Fumarylacetoacetate (FAA) hydrolase family;; Fumarylacetoacetase N-terminal	Fumarylacetoacetase GN=fah OS=Dictyostelium discoideum (Slime mold) PE=3 SV=1	Q	Secondary metabolites biosynthesis, transport and catabolism	Fumarylacetoacetase [Crassostrea gigas]
F01.PB219	--	--	Biological Process: defense response (GO:0006952);;	--	--	--	--	Arthropod defensin;; Gamma-thionin family	Defensin-1 (Precursor) OS=Apis mellifera (Honeybee) PE=1 SV=3	S	Function unknown	defensin [Dreissena polymorpha]
F01.PB20455	[L]	Replication, recombination and repair	--	K10848|0|lgi:LOTGIDRAFT_104289|hypothetical protein; K10848 DNA excision repair protein ERCC-4 [EC:3.1.-.-] (A)	ko03420:Nucleotide excision repair;ko03460:Fanconi anemia pathway	[L]	Replication, recombination and repair	ERCC4 domain	DNA repair endonuclease XPF GN=mei-9 OS=Drosophila melanogaster (Fruit fly) PE=1 SV=2	L	Replication, recombination and repair	DNA repair endonuclease XPF [Crassostrea gigas]
F01.PB10402	--	--	--	--	--	--	--	PQ loop repeat	Cystinosin homolog GN=CG17119 OS=Drosophila melanogaster (Fruit fly) PE=1 SV=2	--	--	hypothetical protein CGI_10017088 [Crassostrea gigas]
F01.PB6369	[F]	Nucleotide transport and metabolism	Molecular Function: transferase activity, transferring glycosyl groups (GO:0016757);;	K03783|4.92206e-107|mze:101486224|purine nucleoside phosphorylase-like; K03783 purine-nucleoside phosphorylase [EC:2.4.2.1] (A)	ko00230:Purine metabolism;ko00240:Pyrimidine metabolism;ko00760:Nicotinate and nicotinamide metabolism	[F]	Nucleotide transport and metabolism	Phosphorylase superfamily	S-methyl-5&apos;-thioadenosine phosphorylase {ECO:0000255|HAMAP-Rule:MF_03155} OS=Aedes aegypti (Yellowfever mosquito) PE=3 SV=1	F	Nucleotide transport and metabolism	PREDICTED: purine nucleoside phosphorylase-like isoform X2 [Aplysia californica]
F01.PB12208	[R]	General function prediction only	--	K09228|9.81381e-19|mdo:100033206|ZNF2; zinc finger protein 2; K09228 KRAB domain-containing zinc finger protein (A)	--	[R]	General function prediction only	Zinc-finger double domain;; Zinc finger, C2H2 type	Protein suppressor of hairy wing GN=su(Hw) OS=Drosophila virilis (Fruit fly) PE=2 SV=1	S	Function unknown	PREDICTED: zinc finger protein 846-like [Saccoglossus kowalevskii]
F01.PB22201	[R]	General function prediction only	--	--	--	[R]	General function prediction only	Ankyrin repeats (3 copies);; Ankyrin repeat;; Ankyrin repeats (many copies);; Ankyrin repeats (many copies);; Ankyrin repeat;; MYND finger	Dauer abnormal formation protein 25 GN=daf-25 OS=Caenorhabditis elegans PE=1 SV=2	S	Function unknown	hypothetical protein LOTGIDRAFT_222617 [Lottia gigantea]
F01.PB7125	[R]	General function prediction only	--	--	--	[M]	Cell wall/membrane/envelope biogenesis	Ankyrin repeats (3 copies);; Ankyrin repeats (many copies);; Ankyrin repeat;; Ankyrin repeats (many copies);; Ankyrin repeat	Ankyrin repeat, bromo and BTB domain-containing protein DDB_G0293800 GN=DDB_G0293800 OS=Dictyostelium discoideum (Slime mold) PE=3 SV=1	S	Function unknown	Ankyrin repeat domain-containing protein 60 [Crassostrea gigas]
F01.PB6423	--	--	--	--	--	--	--	C1q domain	--	S	Function unknown	sialic acid binding lectin [Solen grandis]
F01.PB263	--	--	--	--	--	--	--	Interleukin-17	Interleukin 17-like protein (Precursor) OS=Crassostrea gigas (Pacific oyster) PE=2 SV=1	--	--	hypothetical protein D918_07365 [Trichuris suis]
F01.PB17701	--	--	--	--	--	--	--	C1q domain	--	S	Function unknown	sialic acid binding lectin [Solen grandis]
F01.PB5599	[C]	Energy production and conversion	Biological Process: oxidation-reduction process (GO:0055114);;	K03881|7.38321e-17|cqu:ND4|NADH dehydrogenase subunit 4; K03881 NADH-ubiquinone oxidoreductase chain 4 [EC:1.6.5.3] (A)	ko00190:Oxidative phosphorylation	[C]	Energy production and conversion	NADH-Ubiquinone/plastoquinone (complex I), various chains	NADH-ubiquinone oxidoreductase chain 4 GN=ND4 OS=Lumbricus terrestris (Common earthworm) PE=3 SV=1	C	Energy production and conversion	NADH dehydrogenase subunit 4 (mitochondrion) [Meretrix petechialis]
F01.PB12540	[A]	RNA processing and modification	Cellular Component: commitment complex (GO:0000243);; Biological Process: spliceosomal snRNP assembly (GO:0000387);; Biological Process: mRNA 5'-splice site recognition (GO:0000395);; Molecular Function: mRNA binding (GO:0003729);; Cellular Component: U1 snRNP (GO:0005685);; Molecular Function: zinc ion binding (GO:0008270);; Molecular Function: U1 snRNA binding (GO:0030619);; Cellular Component:…	K11095|2.30304e-30|hro:HELRODRAFT_111980|hypothetical protein; K11095 U1 small nuclear ribonucleoprotein C (A)	ko03040:Spliceosome	[A]	RNA processing and modification	U1 zinc finger	U1 small nuclear ribonucleoprotein C {ECO:0000255|HAMAP-Rule:MF_03153} GN=BRAFLDRAFT_69314 OS=Branchiostoma floridae (Florida lancelet) PE=3 SV=1	A	RNA processing and modification	PREDICTED: U1 small nuclear ribonucleoprotein C-like [Aplysia californica]
F01.PB12853	--	--	Molecular Function: serine-type peptidase activity (GO:0008236);; Biological Process: protein metabolic process (GO:0019538);;	K01332|5.7972e-58|bfo:BRAFLDRAFT_125322|hypothetical protein; K01332 complement component 2 [EC:3.4.21.43] (A)	--	[E]	Amino acid transport and metabolism	von Willebrand factor type A domain;; Trypsin;; Sushi domain (SCR repeat);; von Willebrand factor type A domain	Proclotting enzyme heavy chain (Precursor) OS=Tachypleus tridentatus (Japanese horseshoe crab) PE=1 SV=1	O	Posttranslational modification, protein turnover, chaperones	complement factor B-like protein [Ruditapes decussatus]
F01.PB5544	--	--	--	--	--	--	--	--	--	--	--	hypothetical protein CGI_10015499 [Crassostrea gigas]
F01.PB3413	--	--	--	--	--	--	--	--	--	--	--	hypothetical protein BRAFLDRAFT_100321 [Branchiostoma floridae]
F01.PB3841	--	--	--	--	--	--	--	--	--	--	--	PREDICTED: uncharacterized protein LOC101861910 [Aplysia californica]
F01.PB2252	--	--	--	--	--	--	--	Mab-21 protein	--	O	Posttranslational modification, protein turnover, chaperones	Protein mab-21 [Crassostrea gigas]
F01.PB12594	--	--	Biological Process: chromatin modification (GO:0016568);; Molecular Function: transferase activity, transferring acyl groups (GO:0016746);; Biological Process: primary metabolic process (GO:0044238);; Biological Process: cellular macromolecule metabolic process (GO:0044260);;	K11303|0|lgi:LOTGIDRAFT_232538|hypothetical protein; K11303 histone acetyltransferase 1 [EC:2.3.1.48] (A)	--	[B]	Chromatin structure and dynamics	Histone acetyl transferase HAT1 N-terminus	Histone acetyltransferase type B catalytic subunit DDB_G0275159 GN=DDB_G0275159 OS=Dictyostelium discoideum (Slime mold) PE=3 SV=1	B	Chromatin structure and dynamics	hypothetical protein LOTGIDRAFT_232538 [Lottia gigantea]
F01.PB20359	[I]	Lipid transport and metabolism	--	--	--	[T]	Signal transduction mechanisms	Carboxylesterase family;; alpha/beta hydrolase fold	Acetylcholinesterase (Precursor) GN=ACHE1 OS=Culex pipiens (House mosquito) PE=2 SV=2	I	Lipid transport and metabolism	hypothetical protein LOTGIDRAFT_154015 [Lottia gigantea]
F01.PB4455	[R]	General function prediction only	--	--	--	[O]	Posttranslational modification, protein turnover, chaperones	TPR repeat;; Tetratricopeptide repeat;; Tetratricopeptide repeat;; Tetratricopeptide repeat;; Tetratricopeptide repeat;; Tetratricopeptide repeat	STI1-like protein (Fragment) OS=Plasmodium falciparum PE=4 SV=1	S	Function unknown	PREDICTED: protein STIP1 homolog isoform X1 [Aplysia californica]
F01.PB8284	--	--	--	K08881|4.73466e-12|pale:102883136|TRIM24; tripartite motif containing 24; K08881 tripartite motif-containing protein 24 [EC:6.3.2.19] (A)	--	[O]	Posttranslational modification, protein turnover, chaperones	NHL repeat;; B-box zinc finger	--	BK	--	Tripartite motif-containing protein 56 [Crassostrea gigas]
F01.PB4233	--	--	Biological Process: G-protein coupled receptor signaling pathway (GO:0007186);; Molecular Function: G-protein coupled amine receptor activity (GO:0008227);; Cellular Component: membrane (GO:0016020);; Biological Process: regulation of biological quality (GO:0065008);;	K04160|3.5029e-43|cmk:103186492|5-hydroxytryptamine receptor 4-like; K04160 5-hydroxytryptamine receptor 4 (A)	ko04020:Calcium signaling pathway;ko04080:Neuroactive ligand-receptor interaction	[R]	General function prediction only	7 transmembrane receptor (rhodopsin family)	Octopamine receptor beta-1R GN=CG6919 OS=Drosophila melanogaster (Fruit fly) PE=2 SV=1	U	Intracellular trafficking, secretion, and vesicular transport	5-hydroxytryptamine receptor 4 [Crassostrea gigas]
F01.PB2337	--	--	--	--	--	--	--	PMP-22/EMP/MP20/Claudin family;; Lipoma HMGIC fusion partner-like protein;; Amastin surface glycoprotein	--	--	--	--
F01.PB11696	--	--	--	K14529|1.0709e-18|mdo:100014407|RPP14; ribonuclease P/MRP 14kDa subunit; K14529 ribonuclease P protein subunit RPP14 [EC:3.1.26.5] (A)	ko03013:RNA transport	--	--	Domain of unknown function (DUF4504);; Domain of unknown function (DUF4504)	--	J	Translation, ribosomal structure and biogenesis	hypothetical protein BRAFLDRAFT_205655 [Branchiostoma floridae]
F01.PB9783	--	--	--	--	--	[R]	General function prediction only	Thrombospondin type 1 domain;; EGF-like domain;; Fibrinogen beta and gamma chains, C-terminal globular domain	Techylectin-5A (Precursor) OS=Tachypleus tridentatus (Japanese horseshoe crab) PE=1 SV=1	S	Function unknown	PREDICTED: tenascin-R-like [Amphimedon queenslandica]
F01.PB19119	--	--	--	K05038|1.63787e-65|lgi:LOTGIDRAFT_235858|hypothetical protein; K05038 solute carrier family 6 (neurotransmitter transporter, amino acid) member 5/7/9/14 (A)	--	[T]	Signal transduction mechanisms	Sodium:neurotransmitter symporter family	Sodium-dependent serotonin transporter GN=SerT OS=Drosophila melanogaster (Fruit fly) PE=2 SV=1	P	Inorganic ion transport and metabolism	hypothetical protein LOTGIDRAFT_235858 [Lottia gigantea]
F01.PB12374	--	--	Biological Process: cell cycle process (GO:0022402);; Biological Process: reproductive process (GO:0022414);; Biological Process: single-organism developmental process (GO:0044767);; Biological Process: negative regulation of cell cycle (GO:0045786);; Biological Process: organ development (GO:0048513);;	K09993|3.65608e-12|lgi:LOTGIDRAFT_238363|hypothetical protein; K09993 cyclin-dependent kinase inhibitor 1C (A)	--	[T]	Signal transduction mechanisms	Cyclin-dependent kinase inhibitor	Cyclin-dependent kinase inhibitor 1 GN=cki-1 OS=Caenorhabditis elegans PE=2 SV=1	T	Signal transduction mechanisms	hypothetical protein LOTGIDRAFT_238363 [Lottia gigantea]
F01.PB16313	[GEPR]	--	--	K08187|5.06526e-85|lgi:LOTGIDRAFT_107137|hypothetical protein; K08187 MFS transporter, MCP family, solute carrier family 16 (monocarboxylic acid transporters), member 10 (A)	--	[G]	Carbohydrate transport and metabolism	Major Facilitator Superfamily	--	E	Amino acid transport and metabolism	hypothetical protein LOTGIDRAFT_107137 [Lottia gigantea]
F01.PB15958	[R]	General function prediction only	--	K05038|2.51521e-105|hro:HELRODRAFT_140021|hypothetical protein; K05038 solute carrier family 6 (neurotransmitter transporter, amino acid) member 5/7/9/14 (A)	--	[T]	Signal transduction mechanisms	Sodium:neurotransmitter symporter family	Sodium-dependent serotonin transporter GN=SerT OS=Drosophila melanogaster (Fruit fly) PE=2 SV=1	P	Inorganic ion transport and metabolism	Sodium- and chloride-dependent glycine transporter 2 [Crassostrea gigas]
F01.PB9046	--	--	--	K06560|1.12984e-42|lgi:LOTGIDRAFT_161348|hypothetical protein; K06560 mannose receptor, C type (A)	ko04145:Phagosome	[TV]	--	Lectin C-type domain	Alpha-N-acetylgalactosamine-specific lectin {ECO:0000303|PubMed:11886841} (Precursor) OS=Patiria pectinifera (Starfish) PE=1 SV=1	U	Intracellular trafficking, secretion, and vesicular transport	Macrophage mannose receptor 1 [Crassostrea gigas]
F01.PB10525	[I]	Lipid transport and metabolism	Biological Process: metabolic process (GO:0008152);; Molecular Function: transferase activity, transferring acyl groups other than amino-acyl groups (GO:0016747);;	K07509|0|lgi:LOTGIDRAFT_157797|hypothetical protein; K07509 acetyl-CoA acyltransferase [EC:2.3.1.16] (A)	ko00062:Fatty acid elongation;ko00071:Fatty acid degradation;ko00280:Valine, leucine and isoleucine degradation;ko01212:Fatty acid metabolism	[I]	Lipid transport and metabolism	Thiolase, N-terminal domain;; Thiolase, C-terminal domain;; Beta-ketoacyl synthase, N-terminal domain	Uncharacterized protein B0303.3 GN=B0303.3 OS=Caenorhabditis elegans PE=3 SV=1	I	Lipid transport and metabolism	hypothetical protein LOTGIDRAFT_157797 [Lottia gigantea]
F01.PB5667	--	--	--	K11313|7.99263e-84|lgi:LOTGIDRAFT_119719|hypothetical protein; K11313 transcription initiation protein SPT3 (A)	--	[K]	Transcription	Transcription initiation factor IID, 18kD subunit	Transcription initiation factor TFIID subunit 13 GN=taf13 OS=Dictyostelium discoideum (Slime mold) PE=3 SV=1	K	Transcription	hypothetical protein LOTGIDRAFT_119719 [Lottia gigantea]
F01.PB3351	--	--	Biological Process: proteolysis (GO:0006508);; Molecular Function: cysteine-type peptidase activity (GO:0008234);;	K01363|1.56581e-131|lgi:LOTGIDRAFT_197490|hypothetical protein; K01363 cathepsin B [EC:3.4.22.1] (A)	ko04142:Lysosome	[O]	Posttranslational modification, protein turnover, chaperones	Papain family cysteine protease	Cathepsin B-like cysteine proteinase (Precursor) GN=CATB OS=Schistosoma japonicum (Blood fluke) PE=2 SV=1	O	Posttranslational modification, protein turnover, chaperones	cathepsin B [Meretrix meretrix]
F01.PB17804	--	--	--	--	--	--	--	Ependymin	--	--	--	hypothetical protein CGI_10019557 [Crassostrea gigas]
F01.PB2680	--	--	--	--	--	--	--	Farnesoic acid 0-methyl transferase;; Lectin C-type domain;; UL45 protein	Perlucin OS=Haliotis laevigata (Abalone) PE=1 SV=3	S	Function unknown	C3 and PZP-like alpha-2-macroglobulin domain-containing protein 8 [Crassostrea gigas]
F01.PB7524	--	--	Cellular Component: MCM complex (GO:0042555);;	--	--	[S]	Function unknown	Putative alanine racemase;; Mini-chromosome maintenance replisome factor	Mini-chromosome maintenance complex-binding protein GN=CG3430 OS=Drosophila melanogaster (Fruit fly) PE=1 SV=1	S	Function unknown	PREDICTED: mini-chromosome maintenance complex-binding protein-like [Strongylocentrotus purpuratus]
F01.PB5628	[O]	Posttranslational modification, protein turnover, chaperones	--	--	--	[O]	Posttranslational modification, protein turnover, chaperones	Hsp70 protein	Heat shock protein 70 B2 GN=HSP70B2 OS=Anopheles albimanus (New world malaria mosquito) PE=3 SV=1	O	Posttranslational modification, protein turnover, chaperones	Heat shock 70 kDa protein 12A [Crassostrea gigas]
F01.PB9894	[L]	Replication, recombination and repair	--	--	--	--	--	Putative RNA methylase family UPF0020;; Methyltransferase domain;; THUMP domain;; ubiE/COQ5 methyltransferase family	--	L	Replication, recombination and repair	THUMP domain-containing protein 3 [Crassostrea gigas]
F01.PB21425	--	--	--	--	--	--	--	NHL repeat;; B-box zinc finger;; SdiA-regulated	--	S	Function unknown	Tripartite motif-containing protein 56 [Crassostrea gigas]
F01.PB22033	--	--	--	--	--	[S]	Function unknown	Cysteine-rich secretory protein family	Cysteine-rich venom protein (Precursor) OS=Conus textile (Cloth-of-gold cone) PE=1 SV=1	S	Function unknown	Cysteine-rich secretory protein Mr30 [Crassostrea gigas]
F01.PB19440	--	--	--	K06460|1.49374e-54|lgi:LOTGIDRAFT_202951|hypothetical protein; K06460 CD9 antigen (A)	--	[R]	General function prediction only	Tetraspanin family	23 kDa integral membrane protein OS=Schistosoma haematobium (Blood fluke) PE=2 SV=1	S	Function unknown	hypothetical protein CAPTEDRAFT_182031 [Capitella teleta]
F01.PB11741	--	--	--	K06638|3.99033e-116|spu:591426|mitotic spindle assembly checkpoint protein MAD1-like; K06638 mitotic spindle assembly checkpoint protein MAD1 (A)	--	[D]	Cell cycle control, cell division, chromosome partitioning	Mitotic checkpoint protein	--	S	Function unknown	PREDICTED: mitotic spindle assembly checkpoint protein MAD1-like isoform X1 [Aplysia californica]
F01.PB17613	[Z]	Cytoskeleton	Molecular Function: GTPase activity (GO:0003924);; Molecular Function: structural constituent of cytoskeleton (GO:0005200);; Molecular Function: GTP binding (GO:0005525);; Cellular Component: cytoplasm (GO:0005737);; Cellular Component: microtubule (GO:0005874);; Biological Process: GTP catabolic process (GO:0006184);; Biological Process: microtubule-based process (GO:0007017);; Biological Proces…	K07375|0|lgi:LOTGIDRAFT_202077|hypothetical protein; K07375 tubulin beta (A)	ko04145:Phagosome	[Z]	Cytoskeleton	Tubulin/FtsZ family, GTPase domain;; Tubulin C-terminal domain;; Misato Segment II tubulin-like domain	Tubulin beta chain OS=Paracentrotus lividus (Common sea urchin) PE=2 SV=1	Z	Cytoskeleton	hypothetical protein LOTGIDRAFT_202077 [Lottia gigantea]
F01.PB16417	[R]	General function prediction only	Molecular Function: transporter activity (GO:0005215);; Biological Process: transport (GO:0006810);; Cellular Component: synaptic vesicle (GO:0008021);; Cellular Component: membrane (GO:0016020);; Molecular Function: 1-phosphatidylinositol-4-phosphate 3-kinase activity (GO:0035005);;	--	--	[TU]	--	C2 domain	Synaptotagmin 1 GN=Syt1 OS=Drosophila melanogaster (Fruit fly) PE=1 SV=3	S	Function unknown	synaptotagmin 4 [Lottia gigantea]
F01.PB3594	--	--	--	--	--	[O]	Posttranslational modification, protein turnover, chaperones	Low-density lipoprotein receptor domain class A	--	--	--	hypothetical protein CAPTEDRAFT_187477 [Capitella teleta]
F01.PB4964	--	--	--	--	--	[T]	Signal transduction mechanisms	Glutathione S-transferase, C-terminal domain;; Glutathione S-transferase, C-terminal domain;; Glutathione S-transferase, C-terminal domain	--	S	Function unknown	PREDICTED: failed axon connections homolog [Saccoglossus kowalevskii]
F01.PB12217	[C]	Energy production and conversion	Biological Process: peptidyl-lysine modification to peptidyl-hypusine (GO:0008612);; Molecular Function: deoxyhypusine monooxygenase activity (GO:0019135);;	K06072|7.66157e-130|lgi:LOTGIDRAFT_189149|hypothetical protein; K06072 deoxyhypusine monooxygenase [EC:1.14.99.29] (A)	--	[R]	General function prediction only	HEAT repeats;; PBS lyase HEAT-like repeat;; HEAT repeat;; HEAT-like repeat	Deoxyhypusine hydroxylase {ECO:0000255|HAMAP-Rule:MF_03101} GN=CG2245 OS=Drosophila melanogaster (Fruit fly) PE=2 SV=1	C	Energy production and conversion	hypothetical protein LOTGIDRAFT_189149 [Lottia gigantea]
F01.PB10050	--	--	Cellular Component: ribosome (GO:0005840);; Cellular Component: microtubule associated complex (GO:0005875);; Biological Process: phagocytosis (GO:0006909);; Biological Process: cellular process (GO:0009987);;	--	--	[OR]	--	Ubiquitin family;; Ubiquitin-2 like Rad60 SUMO-like;; Ubiquitin-like domain;; Telomere stability and silencing;; Ubiquitin-2 like Rad60 SUMO-like;; DUF2407 ubiquitin-like domain;; Protein of unknown function (DUF2870);; GLUT4 regulating protein TUG;; FlgD Ig-like domain	Ubiquitin (Precursor) GN=Ubi-p63E OS=Drosophila melanogaster (Fruit fly) PE=3 SV=1	O	Posttranslational modification, protein turnover, chaperones	PREDICTED: uncharacterized protein LOC754856 [Strongylocentrotus purpuratus]
F01.PB12575	[Q]	Secondary metabolites biosynthesis, transport and catabolism	--	K11182|0|lgi:LOTGIDRAFT_118238|hypothetical protein; K11182 diamine oxidase [EC:1.4.3.22] (A)	ko00330:Arginine and proline metabolism;ko00340:Histidine metabolism;ko00380:Tryptophan metabolism	[Q]	Secondary metabolites biosynthesis, transport and catabolism	Copper amine oxidase, enzyme domain;; Copper amine oxidase, N2 domain	Putative amine oxidase [copper-containing] (Precursor) OS=Pinctada margaritifera (Black-lipped pearl oyster) PE=1 SV=1	Q	Secondary metabolites biosynthesis, transport and catabolism	Amiloride-sensitive amine oxidase [copper-containing] [Crassostrea gigas]
F01.PB7527	--	--	--	K06560|1.56113e-75|lgi:LOTGIDRAFT_233857|hypothetical protein; K06560 mannose receptor, C type (A)	ko04145:Phagosome	[TV]	--	Lectin C-type domain;; Lectin C-type domain	Perlucin-like protein {ECO:0000303|PubMed:21643827} (Precursor) OS=Mytilus galloprovincialis (Mediterranean mussel) PE=1 SV=1	U	Intracellular trafficking, secretion, and vesicular transport	hypothetical protein LOTGIDRAFT_233857 [Lottia gigantea]
F01.PB15962	--	--	--	K01245|5.19801e-149|bfo:BRAFLDRAFT_212086|hypothetical protein; K01245 ADP-ribosylarginine hydrolase [EC:3.2.2.19] (A)	--	--	--	ADP-ribosylglycohydrolase;; Nematode insulin-related peptide beta type	[Protein ADP-ribosylarginine] hydrolase GN=adprh OS=Dictyostelium discoideum (Slime mold) PE=3 SV=1	O	Posttranslational modification, protein turnover, chaperones	hypothetical protein BRAFLDRAFT_212086 [Branchiostoma floridae]
F01.PB15	--	--	--	--	--	--	--	--	--	Q	Secondary metabolites biosynthesis, transport and catabolism	hypothetical protein CGI_10028360 [Crassostrea gigas]
F01.PB4215	--	--	Molecular Function: binding (GO:0005488);;	K12896|7.37627e-25|lgi:LOTGIDRAFT_88358|hypothetical protein; K12896 splicing factor, arginine/serine-rich 7 (A)	ko03040:Spliceosome	[A]	RNA processing and modification	--	RNA-binding protein 1 GN=Rbp1 OS=Drosophila melanogaster (Fruit fly) PE=2 SV=3	S	Function unknown	Splicing factor, arginine/serine-rich 7 [Crassostrea gigas]
F01.PB7857	--	--	--	K10990|3.31705e-62|lgi:LOTGIDRAFT_210388|hypothetical protein; K10990 RecQ-mediated genome instability protein 1 (A)	ko03460:Fanconi anemia pathway	[S]	Function unknown	Domain of unknown function (DUF1767)	--	S	Function unknown	RecQ-mediated genome instability protein 1 [Crassostrea gigas]
F01.PB6550	--	--	Molecular Function: transcription regulatory region sequence-specific DNA binding (GO:0000976);; Molecular Function: sequence-specific DNA binding transcription factor activity (GO:0003700);; Cellular Component: nucleus (GO:0005634);; Biological Process: regulation of transcription, DNA-templated (GO:0006355);;	--	--	[R]	General function prediction only	Homeobox domain;; Homeodomain leucine-zipper encoding, Homez	Homeobox protein ceh-1 (Fragment) GN=ceh-1 OS=Caenorhabditis elegans PE=3 SV=1	K	Transcription	Brain-specific homeobox protein [Crassostrea gigas]
F01.PB6032	--	--	--	--	--	[T]	Signal transduction mechanisms	EF-hand domain;; EF-hand domain pair;; EF hand;; EF hand	Caltractin ICL1a GN=Icl1a OS=Paramecium tetraurelia PE=1 SV=2	T	Signal transduction mechanisms	hypothetical protein LOTGIDRAFT_237106 [Lottia gigantea]
F01.PB21397	--	--	--	K11125|1.29512e-105|lgi:LOTGIDRAFT_232390|hypothetical protein; K11125 protein SMG5 (A)	ko03015:mRNA surveillance pathway	[A]	RNA processing and modification	PIN domain;; Est1 DNA/RNA binding domain	--	A	RNA processing and modification	Protein SMG5 [Crassostrea gigas]
F01.PB13776	[R]	General function prediction only	Molecular Function: nucleotide binding (GO:0000166);; Molecular Function: nucleic acid binding (GO:0003676);;	K13161|1.52473e-162|lgi:LOTGIDRAFT_121283|hypothetical protein; K13161 heterogeneous nuclear ribonucleoprotein R (A)	--	[A]	RNA processing and modification	RNA recognition motif. (a.k.a. RRM, RBD, or RNP domain);; RNA recognition motif (a.k.a. RRM, RBD, or RNP domain);; RNA recognition motif. (a.k.a. RRM, RBD, or RNP domain)	Polyadenylate-binding protein GN=pAbp OS=Drosophila melanogaster (Fruit fly) PE=1 SV=3	S	Function unknown	RNA-binding protein [Pinctada fucata]
F01.PB7621	[C]	Energy production and conversion	Molecular Function: ATP citrate synthase activity (GO:0003878);; Molecular Function: succinate-CoA ligase (ADP-forming) activity (GO:0004775);; Biological Process: metabolic process (GO:0008152);; Molecular Function: cofactor binding (GO:0048037);;	K01899|1.10823e-164|lgi:LOTGIDRAFT_218036|hypothetical protein; K01899 succinyl-CoA synthetase alpha subunit [EC:6.2.1.4 6.2.1.5] (A)	ko00020:Citrate cycle (TCA cycle);ko00640:Propanoate metabolism;ko01200:Carbon metabolism	[C]	Energy production and conversion	CoA binding domain;; CoA-ligase;; Succinyl-CoA ligase like flavodoxin domain;; CoA binding domain	Succinyl-CoA ligase [ADP/GDP-forming] subunit alpha, mitochondrial (Precursor) GN=scsA OS=Dictyostelium discoideum (Slime mold) PE=1 SV=3	C	Energy production and conversion	hypothetical protein LOTGIDRAFT_218036 [Lottia gigantea]
F01.PB12553	[E]	Amino acid transport and metabolism	Biological Process: cellular amino acid biosynthetic process (GO:0008652);; Molecular Function: oxidoreductase activity, acting on the aldehyde or oxo group of donors, NAD or NADP as acceptor (GO:0016620);; Molecular Function: transferase activity (GO:0016740);;	K12657|0|lgi:LOTGIDRAFT_225803|hypothetical protein; K12657 delta-1-pyrroline-5-carboxylate synthetase [EC:2.7.2.11 1.2.1.41] (A)	ko00330:Arginine and proline metabolism;ko01230:Biosynthesis of amino acids	[E]	Amino acid transport and metabolism	Amino acid kinase family;; Aldehyde dehydrogenase family	Gamma-glutamyl phosphate reductase GN=alh-13 OS=Caenorhabditis elegans PE=3 SV=2	E	Amino acid transport and metabolism	hypothetical protein LOTGIDRAFT_225803 [Lottia gigantea]
F01.PB20253	--	--	--	--	--	--	--	Galactosyltransferase	--	--	--	--
F01.PB10016	--	--	--	K10426|3.59925e-121|mgp:100548253|DCTN4; dynactin 4 (p62); K10426 dynactin 4 (A)	--	[N]	Cell motility	Dynactin p62 family;; Dynactin p62 family	--	S	Function unknown	Dynactin subunit 4 [Crassostrea gigas]
F01.PB2636	[T]	Signal transduction mechanisms	Molecular Function: phosphoprotein phosphatase activity (GO:0004721);;	K15498|0|lgi:LOTGIDRAFT_170914|hypothetical protein; K15498 serine/threonine-protein phosphatase 6 catalytic subunit [EC:3.1.3.16] (A)	--	[DT]	--	Calcineurin-like phosphoesterase	Serine/threonine-protein phosphatase 6 catalytic subunit GN=PpV OS=Drosophila melanogaster (Fruit fly) PE=2 SV=1	T	Signal transduction mechanisms	hypothetical protein CAPTEDRAFT_174443 [Capitella teleta]
F01.PB12300	--	--	--	--	--	--	--	--	--	S	Function unknown	EF-hand domain-containing protein C3orf25-like protein [Crassostrea gigas]
F01.PB930	[J]	Translation, ribosomal structure and biogenesis	Molecular Function: structural constituent of ribosome (GO:0003735);; Cellular Component: ribosome (GO:0005840);; Biological Process: translation (GO:0006412);;	K02894|1.58391e-78|nvi:100118197|60S ribosomal protein L23; K02894 large subunit ribosomal protein L23e (A)	ko03010:Ribosome	[J]	Translation, ribosomal structure and biogenesis	Ribosomal protein L14p/L23e	60S ribosomal protein L23 GN=RpL23 OS=Drosophila melanogaster (Fruit fly) PE=1 SV=2	J	Translation, ribosomal structure and biogenesis	PREDICTED: 60S ribosomal protein L23 [Acromyrmex echinatior]
F01.PB12084	[KL]	--	Molecular Function: ATP binding (GO:0005524);; Cellular Component: nucleus (GO:0005634);; Biological Process: regulation of transcription, DNA-templated (GO:0006355);; Molecular Function: hydrolase activity, acting on acid anhydrides, in phosphorus-containing anhydrides (GO:0016818);;	K11647|1.26136e-104|lgi:LOTGIDRAFT_207958|hypothetical protein; K11647 SWI/SNF-related matrix-associated actin-dependent regulator of chromatin subfamily A member 2/4 [EC:3.6.4.-] (A)	--	[BK]	--	HSA;; QLQ	ATP-dependent helicase brm GN=brm OS=Drosophila melanogaster (Fruit fly) PE=1 SV=2	L	Replication, recombination and repair	hypothetical protein LOTGIDRAFT_207958 [Lottia gigantea]
F01.PB7062	--	--	--	--	--	--	--	Death domain	--	--	--	hypothetical protein CGI_10012679 [Crassostrea gigas]
F01.PB10440	--	--	--	--	--	--	--	Calponin family repeat;; Calponin family repeat	Calponin homolog OV9M OS=Onchocerca volvulus PE=2 SV=2	Z	Cytoskeleton	hypothetical protein HELRODRAFT_194674 [Helobdella robusta]
F01.PB20957	[Q]	Secondary metabolites biosynthesis, transport and catabolism	Molecular Function: oxidoreductase activity (GO:0016491);; Biological Process: oxidation-reduction process (GO:0055114);;	--	--	--	--	Taurine catabolism dioxygenase TauD, TfdA family	--	Q	Secondary metabolites biosynthesis, transport and catabolism	PREDICTED: alpha-ketoglutarate-dependent sulfonate dioxygenase-like isoform X4 [Aplysia californica]
F01.PB17084	--	--	--	--	--	--	--	--	--	--	--	hypothetical protein CGI_10012368 [Crassostrea gigas]
F01.PB15489	--	--	--	--	--	[TZR]	--	LIM domain;; PET Domain	Protein espinas OS=Drosophila pseudoobscura pseudoobscura (Fruit fly) PE=3 SV=1	S	Function unknown	Testin [Crassostrea gigas]
F01.PB14747	--	--	--	--	--	--	--	--	--	S	Function unknown	Three prime repair exonuclease 1 [Crassostrea gigas]
F01.PB8825	--	--	Biological Process: metabolic process (GO:0008152);;	--	--	[P]	Inorganic ion transport and metabolism	Frataxin-like domain	Frataxin homolog, mitochondrial (Precursor) GN=fh OS=Drosophila melanogaster (Fruit fly) PE=2 SV=1	P	Inorganic ion transport and metabolism	PREDICTED: frataxin, mitochondrial-like [Bombus impatiens]
F01.PB15620	--	--	--	--	--	--	--	Popeye protein conserved region	--	U	Intracellular trafficking, secretion, and vesicular transport	PREDICTED: blood vessel epicardial substance-like [Aplysia californica]
F01.PB15533	--	--	Biological Process: single-organism process (GO:0044699);;	K08628|1.28567e-27|oas:101106305|ADAMTS14; ADAM metallopeptidase with thrombospondin type 1 motif, 14; K08628 a disintegrin and metalloproteinase with thrombospondin motifs 14 [EC:3.4.24.-] (A)	--	[O]	Posttranslational modification, protein turnover, chaperones	Thrombospondin type 1 domain;; Low-density lipoprotein receptor domain class A;; Reprolysin (M12B) family zinc metalloprotease;; Metallo-peptidase family M12;; Metallo-peptidase family M12B Reprolysin-like	Papilin (Precursor) GN=mig-6 OS=Caenorhabditis elegans PE=1 SV=1	S	Function unknown	A disintegrin and metalloproteinase with thrombospondin motifs 2 [Crassostrea gigas]
F01.PB4264	[K]	Transcription	Molecular Function: translation initiation factor activity (GO:0003743);; Biological Process: transcription from RNA polymerase II promoter (GO:0006366);; Biological Process: translational initiation (GO:0006413);; Molecular Function: protein heterodimerization activity (GO:0046982);;	--	--	[K]	Transcription	Transcription initiation factor IID, 18kD subunit	Transcription initiation factor TFIID subunit 13 GN=taf13 OS=Dictyostelium discoideum (Slime mold) PE=3 SV=1	K	Transcription	PREDICTED: transcription initiation factor TFIID subunit 13-like [Aplysia californica]
F01.PB21884	--	--	--	--	--	--	--	--	--	S	Function unknown	hypothetical protein Y032_0153g2941 [Ancylostoma ceylanicum]
F01.PB2486	[F]	Nucleotide transport and metabolism	--	--	--	[T]	Signal transduction mechanisms	NUDIX domain	mRNA-decapping enzyme 2 GN=dcap-2 OS=Caenorhabditis elegans PE=2 SV=4	S	Function unknown	Nucleoside diphosphate-linked moiety X motif 6 [Crassostrea gigas]
F01.PB21943	--	--	--	K03662|2.42958e-34|bfo:BRAFLDRAFT_102546|hypothetical protein; K03662 V-type H+-transporting ATPase S1 subunit (A)	ko00190:Oxidative phosphorylation;ko04142:Lysosome;ko04145:Phagosome	[C]	Energy production and conversion	Vacuolar ATP synthase subunit S1 (ATP6S1)	--	U	Intracellular trafficking, secretion, and vesicular transport	V-type proton ATPase subunit S1 [Crassostrea gigas]
F01.PB13615	[S]	Function unknown	--	K11997|3.33947e-32|bfo:BRAFLDRAFT_85511|hypothetical protein; K11997 tripartite motif-containing protein 2/3 (A)	--	[O]	Posttranslational modification, protein turnover, chaperones	B-box zinc finger;; Zinc finger, C3HC4 type (RING finger)	Protein wech GN=wech OS=Drosophila melanogaster (Fruit fly) PE=1 SV=2	O	Posttranslational modification, protein turnover, chaperones	Tripartite motif-containing protein 3 [Crassostrea gigas]
F01.PB18893	--	--	Molecular Function: mannosyl-oligosaccharide 1,2-alpha-mannosidase activity (GO:0004571);; Molecular Function: calcium ion binding (GO:0005509);; Cellular Component: membrane (GO:0016020);;	K10085|0|isc:IscW_ISCW023884|hypothetical protein; K10085 ER degradation enhancer, mannosidase alpha-like 2 (A)	ko04141:Protein processing in endoplasmic reticulum	[G]	Carbohydrate transport and metabolism	Glycosyl hydrolase family 47	Mannosyl-oligosaccharide alpha-1,2-mannosidase isoform B GN=alpha-Man-I OS=Drosophila melanogaster (Fruit fly) PE=2 SV=2	O	Posttranslational modification, protein turnover, chaperones	ER degradation-enhancing alpha-mannosidase-like 2 [Crassostrea gigas]
F01.PB2255	--	--	--	--	--	--	--	--	--	--	--	hypothetical protein CGI_10024719 [Crassostrea gigas]
F01.PB16978	--	--	Molecular Function: Ran GTPase binding (GO:0008536);;	--	--	[R]	General function prediction only	CTLH/CRA C-terminal to LisH motif domain;; SPRY domain;; LisH	Ran-binding proteins 9/10 homolog GN=RanBPM OS=Drosophila melanogaster (Fruit fly) PE=1 SV=1	S	Function unknown	hypothetical protein LOTGIDRAFT_122405 [Lottia gigantea]
F01.PB9588	--	--	--	--	--	--	--	Sperm-tail PG-rich repeat	--	S	Function unknown	hypothetical protein LOTGIDRAFT_169322 [Lottia gigantea]
F01.PB11306	--	--	--	--	--	[U]	Intracellular trafficking, secretion, and vesicular transport	Transport protein Trs120 or TRAPPC9, TRAPP II complex subunit	Protein brunelleschi GN=bru OS=Drosophila melanogaster (Fruit fly) PE=1 SV=2	S	Function unknown	hypothetical protein LOTGIDRAFT_130513 [Lottia gigantea]
F01.PB14313	[R]	General function prediction only	Molecular Function: GTP binding (GO:0005525);; Biological Process: small GTPase mediated signal transduction (GO:0007264);; Biological Process: protein transport (GO:0015031);;	K17199|6.00319e-70|apla:101797406|ras and EF-hand domain-containing protein-like; K17199 Ras and EF-hand domain-containing protein (A)	--	[TU]	--	Ras family;; Miro-like protein;; ADP-ribosylation factor family;; 50S ribosome-binding GTPase;; Elongation factor Tu GTP binding domain;; Gtr1/RagA G protein conserved region	Ras and EF-hand domain-containing protein homolog (Precursor) GN=tag-312 OS=Caenorhabditis briggsae PE=3 SV=1	S	Function unknown	RAS and EF-hand domain-containing-like protein [Crassostrea gigas]
F01.PB12760	--	--	--	K12026|5.8107e-27|bfo:BRAFLDRAFT_80400|hypothetical protein; K12026 tripartite motif-containing protein 56 [EC:6.3.2.19] (A)	--	[O]	Posttranslational modification, protein turnover, chaperones	RING-type zinc-finger;; Ring finger domain;; B-box zinc finger;; Zinc finger, C3HC4 type (RING finger);; Zinc finger, C3HC4 type (RING finger);; zinc finger of C3HC4-type, RING;; Zinc finger, C3HC4 type (RING finger);; zinc-RING finger domain;; NHL repeat	B-box type zinc finger protein ncl-1 GN=ncl-1 OS=Caenorhabditis elegans PE=1 SV=1	S	Function unknown	hypothetical protein CGI_10003688 [Crassostrea gigas]
F01.PB6847	--	--	--	--	--	--	--	RIB43A	--	S	Function unknown	RIB43A-like with coiled-coils protein 2 [Crassostrea gigas]
F01.PB16423	--	--	--	--	--	[U]	Intracellular trafficking, secretion, and vesicular transport	Region in Clathrin and VPS;; WD domain, G-beta repeat;; Vacuolar sorting protein 39 domain 2	Vacuolar protein sorting-associated protein 41 homolog GN=vps-41 OS=Caenorhabditis elegans PE=3 SV=4	S	Function unknown	Vacuolar protein sorting-associated protein 41-like protein [Crassostrea gigas]
F01.PB12641	[KL]	--	Molecular Function: nucleic acid binding (GO:0003676);; Molecular Function: catalytic activity (GO:0003824);;	K10877|0|lcm:102365766|RAD54B; RAD54 homolog B (S. cerevisiae); K10877 DNA repair and recombination protein RAD54B [EC:3.6.4.-] (A)	ko03440:Homologous recombination	[L]	Replication, recombination and repair	SNF2 family N-terminal domain;; Helicase conserved C-terminal domain;; Type III restriction enzyme, res subunit;; DEAD/DEAH box helicase	DNA repair and recombination protein RAD54-like {ECO:0000250|UniProtKB:O76460} OS=Drosophila mojavensis (Fruit fly) PE=3 SV=1	L	Replication, recombination and repair	PREDICTED: LOW QUALITY PROTEIN: DNA repair and recombination protein RAD54B-like [Aplysia californica]
F01.PB9814	--	--	--	--	--	--	--	--	--	--	--	hypothetical protein CAPTEDRAFT_194236 [Capitella teleta]
F01.PB7686	--	--	--	--	--	--	--	EB module	--	--	--	--
F01.PB4831	--	--	--	--	--	--	--	BRICHOS domain	--	--	--	--
F01.PB6416	[Z]	Cytoskeleton	Molecular Function: GTPase activity (GO:0003924);; Molecular Function: structural constituent of cytoskeleton (GO:0005200);; Molecular Function: ATP binding (GO:0005524);; Molecular Function: GTP binding (GO:0005525);; Cellular Component: cytoplasm (GO:0005737);; Cellular Component: microtubule (GO:0005874);; Biological Process: GTP catabolic process (GO:0006184);; Biological Process: ATP catabol…	K07374|5.28676e-162|cge:100765599|tubulin alpha-3 chain; K07374 tubulin alpha (A)	ko04145:Phagosome;ko04540:Gap junction	[Z]	Cytoskeleton	Tubulin/FtsZ family, GTPase domain;; Tubulin/FtsZ family, GTPase domain	Tubulin alpha-1 chain GN=alphaTub84B OS=Drosophila melanogaster (Fruit fly) PE=2 SV=1	Z	Cytoskeleton	Alpha-tubulin [Reticulomyxa filosa]
F01.PB21695	[R]	General function prediction only	Molecular Function: metal ion binding (GO:0046872);;	--	--	[R]	General function prediction only	Zinc-finger double domain;; C2H2-type zinc finger;; Zinc finger, C2H2 type;; Zinc-finger double domain;; Zinc finger, C2H2 type;; C2H2-type zinc finger	Probable transcription factor Ken (Fragment) GN=ken OS=Drosophila yakuba (Fruit fly) PE=2 SV=1	S	Function unknown	Gastrula zinc finger protein, partial [Stegodyphus mimosarum]
F01.PB20179	--	--	--	--	--	[S]	Function unknown	N1221-like protein	--	S	Function unknown	hypothetical protein LOTGIDRAFT_221410 [Lottia gigantea]
F01.PB17635	[Z]	Cytoskeleton	Molecular Function: GTPase activity (GO:0003924);; Molecular Function: structural constituent of cytoskeleton (GO:0005200);; Molecular Function: GTP binding (GO:0005525);; Cellular Component: cytoplasm (GO:0005737);; Cellular Component: microtubule (GO:0005874);; Biological Process: GTP catabolic process (GO:0006184);; Biological Process: microtubule-based process (GO:0007017);; Biological Proces…	K07375|0|spu:373275|beta-tubulin (SP-beta1); K07375 tubulin beta (A)	ko04145:Phagosome	[Z]	Cytoskeleton	Tubulin/FtsZ family, GTPase domain;; Tubulin C-terminal domain;; Misato Segment II tubulin-like domain	Tubulin beta chain OS=Paracentrotus lividus (Common sea urchin) PE=2 SV=1	Z	Cytoskeleton	Tubulin beta chain [Crassostrea gigas]
F01.PB13498	--	--	--	--	--	--	--	ATPase family AAA domain containing 4	--	--	--	hypothetical protein CGI_10020949 [Crassostrea gigas]
F01.PB12530	[R]	General function prediction only	Molecular Function: structural molecule activity (GO:0005198);; Biological Process: intracellular protein transport (GO:0006886);; Biological Process: vesicle-mediated transport (GO:0016192);; Molecular Function: myosin heavy chain kinase activity (GO:0016905);; Cellular Component: membrane coat (GO:0030117);;	K17302|0|lgi:LOTGIDRAFT_182444|hypothetical protein; K17302 coatomer, subunit beta' (A)	--	[U]	Intracellular trafficking, secretion, and vesicular transport	Coatomer WD associated region;; WD domain, G-beta repeat;; Coatomer WD associated region	Coatomer subunit beta&apos; GN=beta&apos;Cop OS=Drosophila melanogaster (Fruit fly) PE=2 SV=2	S	Function unknown	hypothetical protein LOTGIDRAFT_182444 [Lottia gigantea]
F01.PB8275	[O]	Posttranslational modification, protein turnover, chaperones	Biological Process: protein peptidyl-prolyl isomerization (GO:0000413);; Molecular Function: peptidyl-prolyl cis-trans isomerase activity (GO:0003755);;	K09579|1.51196e-58|cbr:CBG20785|Hypothetical protein CBG20785; K09579 peptidyl-prolyl cis-trans isomerase NIMA-interacting 4 [EC:5.2.1.8] (A)	--	[O]	Posttranslational modification, protein turnover, chaperones	PPIC-type PPIASE domain;; PPIC-type PPIASE domain	--	O	Posttranslational modification, protein turnover, chaperones	Peptidyl-prolyl cis-trans isomerase NIMA-interacting 4 [Toxocara canis]
F01.PB13730	--	--	--	--	--	[O]	Posttranslational modification, protein turnover, chaperones	Hsp70 protein	--	O	Posttranslational modification, protein turnover, chaperones	Heat shock 70 kDa protein 12A [Crassostrea gigas]
F01.PB7469	--	--	--	--	--	--	--	--	--	K	Transcription	Uncharacterized protein C1orf50-like protein [Crassostrea gigas]
F01.PB9892	--	--	--	--	--	--	--	Chitin binding Peritrophin-A domain;; Chitin binding Peritrophin-A domain	--	--	--	unnamed protein product [Oikopleura dioica]
F01.PB1765	[C]	Energy production and conversion	Cellular Component: mitochondrion (GO:0005739);; Molecular Function: ubiquinol-cytochrome-c reductase activity (GO:0008121);; Biological Process: electron transport chain (GO:0022900);; Molecular Function: metal ion binding (GO:0046872);; Molecular Function: 2 iron, 2 sulfur cluster binding (GO:0051537);; Cellular Component: respiratory chain (GO:0070469);;	K00411|2.76219e-93|tru:101061875|cytochrome b-c1 complex subunit Rieske, mitochondrial-like; K00411 ubiquinol-cytochrome c reductase iron-sulfur subunit [EC:1.10.2.2] (A)	ko00190:Oxidative phosphorylation;ko04260:Cardiac muscle contraction	[C]	Energy production and conversion	Ubiquinol cytochrome reductase transmembrane region;; Rieske [2Fe-2S] domain	--	C	Energy production and conversion	ubiquinol-cytochrome c reductase iron-sulfur subunit [Anopheles darlingi]
F01.PB9072	--	--	--	--	--	--	--	--	--	S	Function unknown	hypothetical protein X975_08032, partial [Stegodyphus mimosarum]
F01.PB16994	[G]	Carbohydrate transport and metabolism	--	K12373|0|lgi:LOTGIDRAFT_168843|hypothetical protein; K12373 hexosaminidase [EC:3.2.1.52] (A)	ko00511:Other glycan degradation;ko00520:Amino sugar and nucleotide sugar metabolism;ko00531:Glycosaminoglycan degradation;ko00603:Glycosphingolipid biosynthesis - globo series;ko00604:Glycosphingolipid biosynthesis - ganglio series;ko04142:Lysosome	[G]	Carbohydrate transport and metabolism	Glycosyl hydrolase family 20, catalytic domain;; Putative carbohydrate binding domain;; Glycosyl hydrolase family 20, domain 2	Putative beta-hexosaminidase {ECO:0000250|UniProtKB:Q04786} (Precursor) OS=Pinctada margaritifera (Black-lipped pearl oyster) PE=1 SV=1	G	Carbohydrate transport and metabolism	hypothetical protein LOTGIDRAFT_168843 [Lottia gigantea]
F01.PB14982	--	--	--	--	--	--	--	--	--	T	Signal transduction mechanisms	hypothetical protein LOTGIDRAFT_166166 [Lottia gigantea]
F01.PB1831	--	--	--	K18740|3.97815e-36|lgi:LOTGIDRAFT_161292|hypothetical protein; K18740 exonuclease 3'-5' domain-containing protein 1 (A)	--	[L]	Replication, recombination and repair	3'-5' exonuclease	--	S	Function unknown	hypothetical protein LOTGIDRAFT_161292 [Lottia gigantea]
F01.PB22385	--	--	Molecular Function: nucleotide binding (GO:0000166);; Molecular Function: metal ion binding (GO:0046872);; Molecular Function: NADHX epimerase activity (GO:0052856);;	K17759|2.15476e-118|lgi:LOTGIDRAFT_117600|hypothetical protein; K17759 NAD(P)H-hydrate epimerase [EC:5.1.99.6] (A)	--	[S]	Function unknown	YjeF-related protein N-terminus	NAD(P)H-hydrate epimerase {ECO:0000255|HAMAP-Rule:MF_03159} GN=BRAFLDRAFT_104103 OS=Branchiostoma floridae (Florida lancelet) PE=3 SV=1	G	Carbohydrate transport and metabolism	hypothetical protein LOTGIDRAFT_117600, partial [Lottia gigantea]
F01.PB13244	--	--	--	--	--	[S]	Function unknown	Tetratricopeptide repeat;; TPR repeat;; Tetratricopeptide repeat;; Tetratricopeptide repeat;; Tetratricopeptide repeat;; Tetratricopeptide repeat;; Tetratricopeptide repeat;; Tetratricopeptide repeat;; Tetratricopeptide repeat;; Anaphase-promoting complex, cyclosome, subunit 3;; Coatomer epsilon subunit;; Tetratricopeptide repeat;; Tetratricopeptide repeat;; Tetratricopeptide repeat	--	S	Function unknown	Tetratricopeptide repeat protein 15 [Crassostrea gigas]
F01.PB19051	--	--	--	--	--	--	--	--	--	--	--	Proline-rich AKT1 substrate 1 [Crassostrea gigas]
F01.PB2881	--	--	--	--	--	--	--	--	--	S	Function unknown	hypothetical protein BRAFLDRAFT_128887 [Branchiostoma floridae]
F01.PB3718	--	--	Molecular Function: carbohydrate binding (GO:0030246);;	K06832|2.62481e-73|bfo:BRAFLDRAFT_126856|hypothetical protein; K06832 galectin-8 (A)	--	[W]	Extracellular structures	Galactoside-binding lectin	32 kDa beta-galactoside-binding lectin GN=GAL-1 OS=Haemonchus contortus (Barber pole worm) PE=2 SV=1	S	Function unknown	tandem repeat galectin [Ruditapes philippinarum]
F01.PB22392	--	--	--	--	--	--	--	NACHT domain	--	S	Function unknown	hypothetical protein BRAFLDRAFT_81619 [Branchiostoma floridae]
F01.PB5049	--	--	--	--	--	--	--	Phytanoyl-CoA dioxygenase (PhyH)	--	S	Function unknown	hypothetical protein LOTGIDRAFT_223496 [Lottia gigantea]
F01.PB9139	[IQ]	--	--	--	--	[I]	Lipid transport and metabolism	AMP-binding enzyme;; AMP-binding enzyme C-terminal domain	--	I	Lipid transport and metabolism	hypothetical protein LOTGIDRAFT_216606 [Lottia gigantea]
F01.PB14796	[G]	Carbohydrate transport and metabolism	--	K12373|0|lgi:LOTGIDRAFT_168843|hypothetical protein; K12373 hexosaminidase [EC:3.2.1.52] (A)	ko00511:Other glycan degradation;ko00520:Amino sugar and nucleotide sugar metabolism;ko00531:Glycosaminoglycan degradation;ko00603:Glycosphingolipid biosynthesis - globo series;ko00604:Glycosphingolipid biosynthesis - ganglio series;ko04142:Lysosome	[G]	Carbohydrate transport and metabolism	Glycosyl hydrolase family 20, catalytic domain;; Putative carbohydrate binding domain;; Glycosyl hydrolase family 20, domain 2	Putative beta-hexosaminidase {ECO:0000250|UniProtKB:Q04786} (Precursor) OS=Pinctada margaritifera (Black-lipped pearl oyster) PE=1 SV=1	G	Carbohydrate transport and metabolism	hypothetical protein LOTGIDRAFT_168843 [Lottia gigantea]
F01.PB14901	[I]	Lipid transport and metabolism	--	--	--	--	--	Enoyl-CoA hydratase/isomerase family;; Formyl transferase, C-terminal domain	--	J	Translation, ribosomal structure and biogenesis	hypothetical protein BRAFLDRAFT_67183 [Branchiostoma floridae]
F01.PB13165	--	--	Molecular Function: RNA ligase (ATP) activity (GO:0003972);; Molecular Function: ATP binding (GO:0005524);; Biological Process: tRNA splicing, via endonucleolytic cleavage and ligation (GO:0006388);; Molecular Function: metal ion binding (GO:0046872);; Cellular Component: tRNA-splicing ligase complex (GO:0072669);;	K14415|0|hro:HELRODRAFT_184836|hypothetical protein; K14415 tRNA-splicing ligase RtcB [EC:6.5.1.3] (A)	--	[S]	Function unknown	tRNA-splicing ligase RtcB	tRNA-splicing ligase RtcB homolog {ECO:0000255|HAMAP-Rule:MF_03144} GN=CG9987 OS=Drosophila melanogaster (Fruit fly) PE=1 SV=1	S	Function unknown	PREDICTED: tRNA-splicing ligase RtcB homolog isoform X1 [Aplysia californica]
F01.PB18882	--	--	--	--	--	[G]	Carbohydrate transport and metabolism	von Willebrand factor type A domain;; von Willebrand factor type A domain;; Glycosyl hydrolase family 65 central catalytic domain;; von Willebrand factor type A domain;; Glycosyl hydrolase family 65 central catalytic domain	Acid trehalase-like protein 1 (Precursor) GN=athl1 OS=Dictyostelium discoideum (Slime mold) PE=3 SV=2	G	Carbohydrate transport and metabolism	hypothetical protein BRAFLDRAFT_121385 [Branchiostoma floridae]
F01.PB3548	--	--	--	--	--	--	--	--	--	S	Function unknown	--
F01.PB12522	[O]	Posttranslational modification, protein turnover, chaperones	Molecular Function: ATP-dependent peptidase activity (GO:0004176);; Molecular Function: serine-type endopeptidase activity (GO:0004252);; Molecular Function: ATP binding (GO:0005524);; Cellular Component: peroxisome (GO:0005777);; Biological Process: proteolysis (GO:0006508);; Biological Process: protein catabolic process (GO:0030163);; Biological Process: cellular catabolic process (GO:0044248);;	K01338|0|lgi:LOTGIDRAFT_109034|hypothetical protein; K01338 ATP-dependent Lon protease [EC:3.4.21.53] (A)	--	[O]	Posttranslational modification, protein turnover, chaperones	Lon protease (S16) C-terminal proteolytic domain;; ATP-dependent protease La (LON) domain;; ATPase family associated with various cellular activities (AAA);; AAA domain (dynein-related subfamily);; Subunit ChlI of Mg-chelatase;; AAA ATPase domain;; AAA domain (Cdc48 subfamily)	Lon protease homolog 2, peroxisomal {ECO:0000255|HAMAP-Rule:MF_03121} GN=CBG23035 OS=Caenorhabditis briggsae PE=3 SV=2	O	Posttranslational modification, protein turnover, chaperones	Peroxisomal Lon protease-like protein 2 [Crassostrea gigas]
F01.PB6818	--	--	--	--	--	--	--	Chitin binding Peritrophin-A domain	--	S	Function unknown	hypothetical protein CGI_10004094 [Crassostrea gigas]
F01.PB13293	--	--	Molecular Function: protein serine/threonine kinase activity (GO:0004674);; Molecular Function: ATP binding (GO:0005524);; Biological Process: protein phosphorylation (GO:0006468);;	K08853|1.16699e-26|spu:753735|AP2-associated protein kinase 1-like; K08853 AP2-associated kinase [EC:2.7.11.1] (A)	--	[T]	Signal transduction mechanisms	Protein kinase domain	Probable serine/threonine-protein kinase DDB_G0280111 GN=DDB_G0280111 OS=Dictyostelium discoideum (Slime mold) PE=3 SV=1	T	Signal transduction mechanisms	AP2-associated protein kinase 1 [Crassostrea gigas]
F01.PB15873	--	--	--	--	--	[O]	Posttranslational modification, protein turnover, chaperones	Zinc finger, C3HC4 type (RING finger);; B-box zinc finger	--	S	Function unknown	Tripartite motif-containing protein 56 [Crassostrea gigas]
F01.PB19410	--	--	--	K17406|1.28184e-52|lgi:LOTGIDRAFT_149768|hypothetical protein; K17406 small subunit ribosomal protein S27 (A)	--	[S]	Function unknown	Mitochondrial 28S ribosomal protein S27	--	S	Function unknown	hypothetical protein LOTGIDRAFT_149768 [Lottia gigantea]
F01.PB4575	--	--	Molecular Function: ligase activity (GO:0016874);;	K11981|1.02449e-66|bfo:BRAFLDRAFT_98231|hypothetical protein; K11981 E3 ubiquitin-protein ligase NRDP1 [EC:6.3.2.19] (A)	ko04144:Endocytosis	[T]	Signal transduction mechanisms	Ring finger domain;; Zinc finger, C3HC4 type (RING finger);; Zinc finger, C3HC4 type (RING finger);; Seven in absentia protein family;; Zinc finger, C3HC4 type (RING finger);; U-box domain;; TRAF-type zinc finger	--	S	Function unknown	hypothetical protein BRAFLDRAFT_98231 [Branchiostoma floridae]
F01.PB12842	[R]	General function prediction only	Molecular Function: histone acetyltransferase activity (GO:0004402);; Cellular Component: nucleus (GO:0005634);; Biological Process: histone acetylation (GO:0016573);;	K10752|0|ame:552200|Caf1, GB10144; chromatin assembly factor 1 subunit; K10752 histone-binding protein RBBP4 (A)	--	[B]	Chromatin structure and dynamics	WD domain, G-beta repeat;; Histone-binding protein RBBP4 or subunit C of CAF1 complex;; Eukaryotic translation initiation factor eIF2A	Probable histone-binding protein Caf1 GN=Caf1 OS=Drosophila melanogaster (Fruit fly) PE=1 SV=1	S	Function unknown	PREDICTED: probable histone-binding protein Caf1 [Microplitis demolitor]
F01.PB13478	[C]	Energy production and conversion	Biological Process: metabolic process (GO:0008152);; Molecular Function: hydrogen ion transmembrane transporter activity (GO:0015078);; Biological Process: ATP hydrolysis coupled proton transport (GO:0015991);; Cellular Component: integral component of membrane (GO:0016021);; Molecular Function: hydrolase activity (GO:0016787);; Cellular Component: proton-transporting V-type ATPase, V0 domain (GO…	K03661|3.36001e-58|tad:TRIADDRAFT_64078|expressed hypothetical protein; K03661 V-type H+-transporting ATPase 21kDa proteolipid subunit (A)	ko00190:Oxidative phosphorylation;ko04142:Lysosome;ko04145:Phagosome	[C]	Energy production and conversion	ATP synthase subunit C	V-type proton ATPase proteolipid subunit GN=vatP OS=Dictyostelium discoideum (Slime mold) PE=2 SV=1	C	Energy production and conversion	expressed hypothetical protein [Trichoplax adhaerens]
F01.PB8430	[J]	Translation, ribosomal structure and biogenesis	Molecular Function: translation initiation factor activity (GO:0003743);; Molecular Function: translation elongation factor activity (GO:0003746);; Cellular Component: cytoplasm (GO:0005737);; Biological Process: translational initiation (GO:0006413);; Biological Process: translational frameshifting (GO:0006452);; Biological Process: peptidyl-lysine modification to peptidyl-hypusine (GO:0008612);…	K03263|1.10802e-69|xma:102219323|eukaryotic translation initiation factor 5A-1-like; K03263 translation initiation factor 5A (A)	--	[J]	Translation, ribosomal structure and biogenesis	Eukaryotic elongation factor 5A hypusine, DNA-binding OB fold;; KOW motif	Eukaryotic translation initiation factor 5A GN=eIF-5A OS=Spodoptera frugiperda (Fall armyworm) PE=2 SV=1	J	Translation, ribosomal structure and biogenesis	eukaryotic translation initiation factor 5A [Placozoa sp. H4]
F01.PB7986	--	--	--	--	--	--	--	C1q domain	--	--	--	sialic acid-binding lectin [Ruditapes philippinarum]
F01.PB21570	[R]	General function prediction only	--	--	--	[T]	Signal transduction mechanisms	FAM220 family;; Ankyrin repeats (3 copies);; Ankyrin repeats (many copies);; Ankyrin repeat;; Ankyrin repeats (many copies);; Ankyrin repeat;; Domain of unknown function (DUF4560)	26S proteasome non-ATPase regulatory subunit 10 GN=psmD10 OS=Dictyostelium discoideum (Slime mold) PE=2 SV=1	S	Function unknown	hypothetical protein LOTGIDRAFT_229258 [Lottia gigantea]
F01.PB14716	--	--	Biological Process: regulation of cellular process (GO:0050794);;	K14319|1.83303e-57|lgi:LOTGIDRAFT_168884|hypothetical protein; K14319 Ran GTPase-activating protein 1 (A)	ko03013:RNA transport	[AYT]	--	RanGAP1 C-terminal domain	--	U	Intracellular trafficking, secretion, and vesicular transport	Ran GTPase-activating protein 1 [Crassostrea gigas]
F01.PB21426	--	--	--	--	--	[RP]	--	Immunoglobulin domain;; Immunoglobulin domain;; Immunoglobulin I-set domain;; CD80-like C2-set immunoglobulin domain;; Immunoglobulin domain	Protein turtle GN=tutl OS=Drosophila melanogaster (Fruit fly) PE=1 SV=2	S	Function unknown	PREDICTED: hemicentin-1-like [Saccoglossus kowalevskii]
F01.PB9675	--	--	Biological Process: DNA damage checkpoint (GO:0000077);; Molecular Function: nucleotide binding (GO:0000166);; Cellular Component: nucleus (GO:0005634);; Biological Process: DNA repair (GO:0006281);; Biological Process: transport (GO:0006810);; Molecular Function: ATPase activity (GO:0016887);;	K02830|3.24614e-151|bfo:BRAFLDRAFT_124789|hypothetical protein; K02830 cell cycle checkpoint protein [EC:3.1.11.2] (A)	--	[DL]	--	Repair protein Rad1/Rec1/Rad17	--	L	Replication, recombination and repair	PREDICTED: cell cycle checkpoint protein RAD1-like [Saccoglossus kowalevskii]
F01.PB288	--	--	Molecular Function: oxidoreductase activity (GO:0016491);;	K03964|7.92842e-32|isc:IscW_ISCW009116|NADH-ubiquinone oxidoreductase ashi subunit, putative (EC:1.6.5.3); K03964 NADH dehydrogenase (ubiquinone) 1 beta subcomplex subunit 8 (A)	ko00190:Oxidative phosphorylation	[C]	Energy production and conversion	NADH-ubiquinone oxidoreductase ASHI subunit (CI-ASHI or NDUFB8)	--	C	Energy production and conversion	hypothetical protein DAPPUDRAFT_301888 [Daphnia pulex]
F01.PB19287	--	--	--	--	--	[T]	Signal transduction mechanisms	Neurotransmitter-gated ion-channel ligand binding domain	Acetylcholine receptor subunit beta-type acr-2 (Precursor) GN=acr-2 OS=Caenorhabditis elegans PE=2 SV=1	U	Intracellular trafficking, secretion, and vesicular transport	neuronal acetylcholine receptor subunit alpha-10-like precursor [Aplysia californica]
F01.PB10998	--	--	--	--	--	--	--	Domain of unknown function (DUF4471);; Domain of unknown function (DUF4470)	Dynein assembly factor 3, axonemal homolog GN=CG17669 OS=Drosophila melanogaster (Fruit fly) PE=2 SV=1	S	Function unknown	hypothetical protein LOTGIDRAFT_227827 [Lottia gigantea]
F01.PB22740	--	--	Molecular Function: DNA binding (GO:0003677);; Cellular Component: spliceosomal complex (GO:0005681);; Biological Process: regulation of transcription, DNA-templated (GO:0006355);; Biological Process: mRNA processing (GO:0006397);; Biological Process: RNA splicing (GO:0008380);;	K13103|6.77346e-109|lgi:LOTGIDRAFT_221309|hypothetical protein; K13103 tuftelin-interacting protein 11 (A)	--	[A]	RNA processing and modification	GC-rich sequence DNA-binding factor-like protein	Septin-interacting protein 1 GN=sip1 OS=Drosophila melanogaster (Fruit fly) PE=1 SV=1	S	Function unknown	Tuftelin-interacting protein 11 [Crassostrea gigas]
F01.PB16234	--	--	Molecular Function: oxidoreductase activity, acting on single donors with incorporation of molecular oxygen, incorporation of two atoms of oxygen (GO:0016702);; Biological Process: single-organism metabolic process (GO:0044710);;	K00456|6.85795e-49|bfo:BRAFLDRAFT_82885|hypothetical protein; K00456 cysteine dioxygenase [EC:1.13.11.20] (A)	ko00270:Cysteine and methionine metabolism;ko00430:Taurine and hypotaurine metabolism	[E]	Amino acid transport and metabolism	Cysteine dioxygenase type I	Cysteine dioxygenase GN=cdo-1 OS=Caenorhabditis briggsae PE=3 SV=1	E	Amino acid transport and metabolism	hypothetical protein BRAFLDRAFT_82885 [Branchiostoma floridae]
F01.PB14250	[A]	RNA processing and modification	--	K12828|0|lgi:LOTGIDRAFT_199416|hypothetical protein; K12828 splicing factor 3B subunit 1 (A)	ko03040:Spliceosome	[A]	RNA processing and modification	HEAT repeats;; HEAT repeat;; HEAT-like repeat	--	A	RNA processing and modification	Splicing factor 3B subunit 1 [Crassostrea gigas]
F01.PB6781	[C]	Energy production and conversion	Molecular Function: cytochrome-c oxidase activity (GO:0004129);; Molecular Function: iron ion binding (GO:0005506);; Cellular Component: mitochondrial inner membrane (GO:0005743);; Biological Process: oxidative phosphorylation (GO:0006119);; Molecular Function: electron carrier activity (GO:0009055);; Biological Process: aerobic respiration (GO:0009060);; Cellular Component: integral component of…	K02256|0|aga:COX1|cytochrome c oxidase subunit I; K02256 cytochrome c oxidase subunit 1 [EC:1.9.3.1] (A)	ko00190:Oxidative phosphorylation	[C]	Energy production and conversion	Cytochrome C and Quinol oxidase polypeptide I;; Cytochrome C and Quinol oxidase polypeptide I;; Cytochrome C and Quinol oxidase polypeptide I;; Cytochrome C and Quinol oxidase polypeptide I	Cytochrome c oxidase subunit 1 GN=COI OS=Patiria pectinifera (Starfish) PE=3 SV=1	C	Energy production and conversion	cytochrome c oxidase subunit I (mitochondrion) [Arctica islandica]
F01.PB18158	--	--	--	--	--	--	--	--	--	--	--	hypothetical protein LOTGIDRAFT_229342 [Lottia gigantea]
F01.PB17484	--	--	--	--	--	--	--	--	--	--	--	unnamed protein product [Oikopleura dioica]
F01.PB3336	--	--	Molecular Function: peptidase activity (GO:0008233);;	K01365|2.41428e-113|dwi:Dwil_GK19626|GK19626 gene product from transcript GK19626-RA; K01365 cathepsin L [EC:3.4.22.15] (A)	ko04142:Lysosome;ko04145:Phagosome	[O]	Posttranslational modification, protein turnover, chaperones	Papain family cysteine protease;; Cathepsin propeptide inhibitor domain (I29)	Cathepsin L light chain (Precursor) GN=Cp1 OS=Drosophila melanogaster (Fruit fly) PE=2 SV=2	O	Posttranslational modification, protein turnover, chaperones	cathepsin L [Cyclina sinensis]
F01.PB8633	--	--	--	--	--	[T]	Signal transduction mechanisms	Mab-21 protein	--	O	Posttranslational modification, protein turnover, chaperones	Protein mab-21 [Crassostrea gigas]
F01.PB11459	[O]	Posttranslational modification, protein turnover, chaperones	Cellular Component: ribosome (GO:0005840);; Cellular Component: microtubule associated complex (GO:0005875);; Biological Process: phagocytosis (GO:0006909);; Biological Process: cellular process (GO:0009987);;	--	--	[OR]	--	Ubiquitin family;; Ubiquitin-2 like Rad60 SUMO-like;; Ubiquitin-like domain;; Telomere stability and silencing;; Ubiquitin-2 like Rad60 SUMO-like;; DUF2407 ubiquitin-like domain;; Protein of unknown function (DUF2870);; GLUT4 regulating protein TUG;; FlgD Ig-like domain;; Ubiquitin family;; Ubiquitin-2 like Rad60 SUMO-like;; Telomere stability and silencing;; Ubiquitin-like domain;; Ubiquitin fam…	Ubiquitin (Precursor) GN=Ubi-p63E OS=Drosophila melanogaster (Fruit fly) PE=3 SV=1	O	Posttranslational modification, protein turnover, chaperones	PREDICTED: uncharacterized protein LOC754856 [Strongylocentrotus purpuratus]
F01.PB12827	[R]	General function prediction only	--	K03363|3.9397e-169|spu:576371|cdc20; cell division cycle 20 homolog (S. cerevisiae); K03363 cell division cycle 20, cofactor of APC complex (A)	ko04120:Ubiquitin mediated proteolysis	[DO]	--	WD domain, G-beta repeat;; Eukaryotic translation initiation factor eIF2A	Anaphase-promoting complex subunit cdc20 GN=cdc20 OS=Dictyostelium discoideum (Slime mold) PE=1 SV=1	D	Cell cycle control, cell division, chromosome partitioning	Cdc20 [Spisula solidissima]
F01.PB3363	--	--	--	--	--	--	--	--	--	S	Function unknown	hypothetical protein LOTGIDRAFT_227914 [Lottia gigantea]
F01.PB19265	--	--	--	K06560|2.93123e-87|lgi:LOTGIDRAFT_231745|hypothetical protein; K06560 mannose receptor, C type (A)	ko04145:Phagosome	[TV]	--	Lectin C-type domain	Hemolymph lipopolysaccharide-binding protein (Precursor) OS=Periplaneta americana (American cockroach) PE=1 SV=1	S	Function unknown	CTL-9 [Argopecten irradians]
F01.PB4398	[Z]	Cytoskeleton	Molecular Function: GTPase activity (GO:0003924);; Molecular Function: structural constituent of cytoskeleton (GO:0005200);; Molecular Function: GTP binding (GO:0005525);; Cellular Component: cytoplasm (GO:0005737);; Cellular Component: microtubule (GO:0005874);; Biological Process: GTP catabolic process (GO:0006184);; Biological Process: microtubule-based process (GO:0007017);; Biological Proces…	K07375|0|hro:HELRODRAFT_186143|hypothetical protein; K07375 tubulin beta (A)	ko04145:Phagosome	[Z]	Cytoskeleton	Tubulin/FtsZ family, GTPase domain;; Tubulin C-terminal domain;; Misato Segment II tubulin-like domain	Tubulin beta chain OS=Paracentrotus lividus (Common sea urchin) PE=2 SV=1	Z	Cytoskeleton	PREDICTED: tubulin beta chain isoform 2 [Strongylocentrotus purpuratus]
F01.PB20171	--	--	--	--	--	[T]	Signal transduction mechanisms	Phospholipase B	Putative phospholipase B-like 1 (Precursor) GN=Y37D8A.2 OS=Caenorhabditis elegans PE=1 SV=1	S	Function unknown	Putative phospholipase B-like 2 [Crassostrea gigas]
F01.PB7865	[E]	Amino acid transport and metabolism	Molecular Function: glutamate-ammonia ligase activity (GO:0004356);; Biological Process: glutamine biosynthetic process (GO:0006542);;	K01915|5.46433e-152|lgi:LOTGIDRAFT_230064|hypothetical protein; K01915 glutamine synthetase [EC:6.3.1.2] (A)	ko00250:Alanine, aspartate and glutamate metabolism;ko00330:Arginine and proline metabolism;ko00630:Glyoxylate and dicarboxylate metabolism;ko00910:Nitrogen metabolism;ko01230:Biosynthesis of amino acids	[E]	Amino acid transport and metabolism	Glutamine synthetase, catalytic domain;; Glutamine synthetase, beta-Grasp domain;; Glutamine synthetase, catalytic domain	Glutamine synthetase 2 cytoplasmic GN=Gs2 OS=Drosophila melanogaster (Fruit fly) PE=2 SV=3	E	Amino acid transport and metabolism	Glutamine synthetase [Crassostrea gigas]
F01.PB11076	--	--	Molecular Function: binding (GO:0005488);;	--	--	--	--	--	--	S	Function unknown	WD repeat-containing protein C10orf79 [Crassostrea gigas]
F01.PB22613	[O]	Posttranslational modification, protein turnover, chaperones	--	K08770|0|api:100165459|polyubiquitin-C; K08770 ubiquitin C (A)	--	[OR]	--	Ubiquitin family;; Ubiquitin-2 like Rad60 SUMO-like;; Ubiquitin-like domain;; Telomere stability and silencing;; Ubiquitin-2 like Rad60 SUMO-like;; DUF2407 ubiquitin-like domain;; Protein of unknown function (DUF2870);; GLUT4 regulating protein TUG;; Ubiquitin family;; Ubiquitin-2 like Rad60 SUMO-like;; Ubiquitin-like domain;; Telomere stability and silencing;; Ubiquitin-2 like Rad60 SUMO-like;; …	Ubiquitin-related (Precursor) GN=ubq-1 OS=Caenorhabditis elegans PE=3 SV=1	O	Posttranslational modification, protein turnover, chaperones	PREDICTED: polyubiquitin-C [Acyrthosiphon pisum]
F01.PB15282	--	--	--	--	--	--	--	--	--	S	Function unknown	predicted protein [Nematostella vectensis]
F01.PB16100	--	--	--	--	--	--	--	--	--	S	Function unknown	PREDICTED: uncharacterized protein LOC101238120 [Hydra vulgaris]
F01.PB18299	--	--	--	--	--	[T]	Signal transduction mechanisms	Mab-21 protein	Protein male abnormal 21 GN=mab-21 OS=Caenorhabditis briggsae PE=3 SV=1	O	Posttranslational modification, protein turnover, chaperones	predicted protein [Nematostella vectensis]
F01.PB17963	--	--	Molecular Function: hydrolase activity (GO:0016787);;	--	--	[O]	Posttranslational modification, protein turnover, chaperones	Calcineurin-like phosphoesterase	--	S	Function unknown	PREDICTED: tartrate-resistant acid phosphatase type 5-like [Saccoglossus kowalevskii]
F01.PB13838	[I]	Lipid transport and metabolism	Biological Process: metabolic process (GO:0008152);; Molecular Function: oxidoreductase activity, acting on the CH-CH group of donors (GO:0016627);;	K15980|0|spu:753939|acyl-CoA dehydrogenase family member 9, mitochondrial-like; K15980 acyl-CoA dehydrogenase family member 9 [EC:1.3.99.-] (A)	--	[I]	Lipid transport and metabolism	Acyl-CoA dehydrogenase, C-terminal domain;; Acyl-CoA dehydrogenase, N-terminal domain;; Acyl-CoA dehydrogenase, middle domain;; Acyl-CoA dehydrogenase, C-terminal domain	Isobutyryl-CoA dehydrogenase, mitochondrial (Precursor) GN=acad8 OS=Dictyostelium discoideum (Slime mold) PE=3 SV=1	I	Lipid transport and metabolism	PREDICTED: acyl-CoA dehydrogenase family member 9, mitochondrial-like [Aplysia californica]
F01.PB8304	--	--	--	--	--	--	--	Innexin	Innexin unc-9 GN=unc-9 OS=Caenorhabditis elegans PE=2 SV=1	S	Function unknown	pannexin 2 [Aplysia californica]
F01.PB12901	--	--	--	--	--	--	--	--	--	--	--	hypothetical protein LOTGIDRAFT_160756 [Lottia gigantea]
F01.PB10701	--	--	--	K15307|4.82354e-40|lgi:LOTGIDRAFT_239575|hypothetical protein; K15307 G protein pathway suppressor 2 (A)	--	--	--	--	--	U	Intracellular trafficking, secretion, and vesicular transport	G protein pathway suppressor 2 [Crassostrea gigas]
F01.PB2152	--	--	--	--	--	--	--	WW domain-binding protein 1	--	--	--	--
F01.PB3188	[TZDR]	--	Cellular Component: spindle pole (GO:0000922);; Molecular Function: calmodulin-dependent protein kinase activity (GO:0004683);; Molecular Function: calcium ion binding (GO:0005509);; Biological Process: detection of calcium ion (GO:0005513);; Molecular Function: calmodulin binding (GO:0005516);; Molecular Function: ATP binding (GO:0005524);; Cellular Component: centriole (GO:0005814);; Cellular C…	K02183|3.24725e-92|mze:101482160|calmodulin-like; K02183 calmodulin (A)	ko04020:Calcium signaling pathway;ko04070:Phosphatidylinositol signaling system;ko04114:Oocyte meiosis;ko04261:Adrenergic signaling in cardiomyocytes;ko04270:Vascular smooth muscle contraction;ko04744:Phototransduction;ko04910:Insulin signaling pathway;ko04912:GnRH signaling pathway;ko04916:Melanogenesis	[T]	Signal transduction mechanisms	EF hand;; EF-hand domain pair;; EF-hand domain pair;; EF-hand domain;; EF hand;; EF-hand domain;; Cytoskeletal-regulatory complex EF hand;; Secreted protein acidic and rich in cysteine Ca binding region;; Uncharacterised protein family (UPF0154);; Ca2+ insensitive EF hand	Calmodulin OS=Ciona intestinalis (Transparent sea squirt) PE=2 SV=3	DTZ	--	calmodulin [Ciona intestinalis]
F01.PB16937	--	--	--	--	--	--	--	--	Protein SMIM7 homolog GN=ISCW013552 OS=Ixodes scapularis (Black-legged tick) PE=3 SV=1	S	Function unknown	hypothetical protein LOTGIDRAFT_208666 [Lottia gigantea]
F01.PB9204	--	--	--	--	--	--	--	Thrombospondin type 1 domain	--	--	--	PREDICTED: SCO-spondin [Ciona intestinalis]
F01.PB20135	--	--	--	--	--	[PT]	--	Receptor family ligand binding region;; Periplasmic binding protein	Metabotropic glutamate receptor (Precursor) GN=mGluR OS=Drosophila melanogaster (Fruit fly) PE=1 SV=2	U	Intracellular trafficking, secretion, and vesicular transport	Metabotropic glutamate receptor 7 [Crassostrea gigas]
F01.PB12800	[U]	Intracellular trafficking, secretion, and vesicular transport	Cellular Component: membrane (GO:0016020);;	K08513|1.22371e-37|lgi:LOTGIDRAFT_184819|hypothetical protein; K08513 vesicle-associated membrane protein 4 (A)	ko04130:SNARE interactions in vesicular transport	[U]	Intracellular trafficking, secretion, and vesicular transport	Synaptobrevin	Synaptobrevin-1 OS=Caenorhabditis elegans PE=1 SV=1	U	Intracellular trafficking, secretion, and vesicular transport	hypothetical protein LOTGIDRAFT_184819 [Lottia gigantea]
F01.PB13973	--	--	--	K17095|8.05684e-120|lgi:LOTGIDRAFT_106233|hypothetical protein; K17095 annexin A7/11 (A)	--	[U]	Intracellular trafficking, secretion, and vesicular transport	Annexin	Annexin-B12 GN=ANXB12 OS=Hydra vulgaris (Hydra) PE=1 SV=1	S	Function unknown	PREDICTED: annexin A7-like isoform X1 [Aplysia californica]
F01.PB216	--	--	--	--	--	--	--	C1q domain	--	S	Function unknown	Complement C1q-like protein 2 [Crassostrea gigas]
F01.PB1789	[S]	Function unknown	Molecular Function: transferase activity (GO:0016740);;	--	--	[R]	General function prediction only	MORN repeat	--	S	Function unknown	MORN repeat-containing protein 5 [Crassostrea gigas]
F01.PB3272	[Z]	Cytoskeleton	--	--	--	[Z]	Cytoskeleton	Actin;; Actin;; Actin;; Actin	Actin, cytoplasmic (Precursor) OS=Planorbella trivolvis (Marsh rams-horn) PE=3 SV=1	Z	Cytoskeleton	Actin [Oesophagostomum dentatum]
F01.PB15172	[RTKL]	--	Molecular Function: protein kinase activity (GO:0004672);; Biological Process: phosphorylation (GO:0016310);;	K08814|2.23539e-101|aml:100465673|tribbles homolog 2-like; K08814 tribbles [EC:2.7.11.-] (A)	--	[T]	Signal transduction mechanisms	Protein kinase domain;; Protein tyrosine kinase	Probable myosin light chain kinase DDB_G0282429 GN=DDB_G0282429 OS=Dictyostelium discoideum (Slime mold) PE=3 SV=1	T	Signal transduction mechanisms	Tribbles-like protein 2 [Crassostrea gigas]
F01.PB1474	--	--	--	K08507|1.39878e-59|lgi:LOTGIDRAFT_102889|hypothetical protein; K08507 unconventional SNARE in the endoplasmic reticulum protein 1 (A)	ko04130:SNARE interactions in vesicular transport	[S]	Function unknown	Membrane fusion protein Use1	Vesicle transport protein USE1 GN=Use1 OS=Drosophila melanogaster (Fruit fly) PE=2 SV=3	U	Intracellular trafficking, secretion, and vesicular transport	PREDICTED: vesicle transport protein USE1-like [Aplysia californica]
F01.PB12176	--	--	--	K12028|6.62558e-102|lgi:LOTGIDRAFT_126485|hypothetical protein; K12028 tripartite motif-containing protein 59 (A)	--	[O]	Posttranslational modification, protein turnover, chaperones	Ring finger domain;; RING-type zinc-finger;; zinc-RING finger domain;; B-box zinc finger;; Zinc finger, C3HC4 type (RING finger);; Zinc finger, C3HC4 type (RING finger);; Zinc finger, C3HC4 type (RING finger)	--	S	Function unknown	Tripartite motif-containing protein 2 [Crassostrea gigas]
F01.PB22417	--	--	Molecular Function: peptidase activity (GO:0008233);;	--	--	[E]	Amino acid transport and metabolism	Trypsin	--	O	Posttranslational modification, protein turnover, chaperones	trypsin-like protein [Hyriopsis cumingii]
F01.PB22053	--	--	Molecular Function: nucleic acid binding (GO:0003676);;	K14327|0|lgi:LOTGIDRAFT_139905|hypothetical protein; K14327 regulator of nonsense transcripts 2 (A)	ko03013:RNA transport;ko03015:mRNA surveillance pathway	[A]	RNA processing and modification	MIF4G domain;; Up-frameshift suppressor 2	--	S	Function unknown	hypothetical protein LOTGIDRAFT_139905, partial [Lottia gigantea]
F01.PB4403	--	--	Biological Process: proteolysis (GO:0006508);; Molecular Function: cysteine-type peptidase activity (GO:0008234);;	K01365|1.66029e-155|lgi:LOTGIDRAFT_204652|hypothetical protein; K01365 cathepsin L [EC:3.4.22.15] (A)	ko04142:Lysosome;ko04145:Phagosome	[O]	Posttranslational modification, protein turnover, chaperones	Papain family cysteine protease;; Cathepsin propeptide inhibitor domain (I29);; Peptidase C1-like family	Cathepsin L light chain (Precursor) OS=Sarcophaga peregrina (Flesh fly) PE=1 SV=1	O	Posttranslational modification, protein turnover, chaperones	cathepsin L2 [Sinonovacula constricta]
F01.PB8570	--	--	--	--	--	[R]	General function prediction only	Casein kinase substrate phosphoprotein PP28	--	S	Function unknown	28 kDa heat- and acid-stable phosphoprotein [Crassostrea gigas]
F01.PB52	[L]	Replication, recombination and repair	Molecular Function: endodeoxyribonuclease activity, producing 5'-phosphomonoesters (GO:0016888);;	K03424|1.60308e-149|lgi:LOTGIDRAFT_181022|hypothetical protein; K03424 TatD DNase family protein [EC:3.1.21.-] (A)	--	[L]	Replication, recombination and repair	TatD related DNase	--	L	Replication, recombination and repair	hypothetical protein LOTGIDRAFT_181022 [Lottia gigantea]
F01.PB17634	--	--	Molecular Function: binding (GO:0005488);;	--	--	--	--	--	--	S	Function unknown	hypothetical protein LOTGIDRAFT_228735 [Lottia gigantea]
F01.PB22597	[J]	Translation, ribosomal structure and biogenesis	Molecular Function: nucleotide binding (GO:0000166);; Biological Process: cellular metabolic process (GO:0044237);; Biological Process: primary metabolic process (GO:0044238);; Biological Process: organic substance metabolic process (GO:0071704);;	K03234|1.1622e-49|lgi:LOTGIDRAFT_202434|hypothetical protein; K03234 elongation factor 2 (A)	--	[J]	Translation, ribosomal structure and biogenesis	Elongation Factor G, domain II	Elongation factor 2 GN=eef-2 OS=Caenorhabditis elegans PE=1 SV=4	J	Translation, ribosomal structure and biogenesis	putative Elongation FacTor [Angiostrongylus cantonensis]
F01.PB16845	[K]	Transcription	--	--	--	[R]	General function prediction only	Domain of unknown function (DUF814);; Domain of unknown function (DUF3441)	Nuclear export mediator factor NEMF homolog {ECO:0000250|UniProtKB:O60524} OS=Drosophila melanogaster (Fruit fly) PE=1 SV=2	K	Transcription	Serologically defined colon cancer antigen 1-like protein [Crassostrea gigas]
F01.PB21464	--	--	--	K06671|6.05986e-130|mcc:718529|cohesin subunit SA-1-like; K06671 cohesin complex subunit SA-1/2 (A)	ko04110:Cell cycle	[D]	Cell cycle control, cell division, chromosome partitioning	--	--	D	Cell cycle control, cell division, chromosome partitioning	Cohesin subunit SA-1 [Crassostrea gigas]
F01.PB6134	--	--	--	K11140|2.63802e-09|bfo:BRAFLDRAFT_130666|hypothetical protein; K11140 aminopeptidase N [EC:3.4.11.2] (A)	ko00480:Glutathione metabolism	--	--	--	--	E	Amino acid transport and metabolism	hypothetical protein BRAFLDRAFT_130666 [Branchiostoma floridae]
F01.PB11989	--	--	--	K11089|1.79952e-49|asn:102374650|TROVE2; TROVE domain family, member 2; K11089 60 kDa SS-A/Ro ribonucleoprotein (A)	--	[S]	Function unknown	--	60 kDa SS-A/Ro ribonucleoprotein homolog GN=rop-1 OS=Caenorhabditis elegans PE=2 SV=1	S	Function unknown	hypothetical protein LOTGIDRAFT_235432 [Lottia gigantea]
F01.PB21847	--	--	--	K06734|6.09995e-08|hsa:51293|CD320, 8D6, 8D6A, TCBLR; CD320 molecule; K06734 CD320 antigen (A)	--	[T]	Signal transduction mechanisms	--	--	S	Function unknown	--
F01.PB12167	--	--	--	K16518|6.89905e-76|lgi:LOTGIDRAFT_215053|hypothetical protein; K16518 A-kinase anchor protein 1, mitochondrial (A)	--	[T]	Signal transduction mechanisms	Tudor domain;; KH domain;; KH domain	KH domain-containing protein C56G2.1 GN=C56G2.1/C56G2.2 OS=Caenorhabditis elegans PE=3 SV=2	S	Function unknown	A kinase anchor protein 1, mitochondrial [Crassostrea gigas]
F01.PB5040	--	--	--	--	--	--	--	C1q domain	--	S	Function unknown	putative C1q domain containing protein MgC1q83 [Mytilus galloprovincialis]
F01.PB21371	[R]	General function prediction only	Molecular Function: neurotransmitter:sodium symporter activity (GO:0005328);; Biological Process: neurotransmitter transport (GO:0006836);; Cellular Component: integral component of membrane (GO:0016021);;	K05034|1.29943e-55|xma:102235665|sodium- and chloride-dependent GABA transporter 1-like; K05034 solute carrier family 6 (neurotransmitter transporter, GABA) member 1 (A)	--	[T]	Signal transduction mechanisms	Sodium:neurotransmitter symporter family;; Sodium:neurotransmitter symporter family	Sodium-dependent serotonin transporter GN=SerT OS=Drosophila melanogaster (Fruit fly) PE=2 SV=1	P	Inorganic ion transport and metabolism	hypothetical protein CAPTEDRAFT_170589 [Capitella teleta]
F01.PB13790	--	--	--	--	--	--	--	7 transmembrane receptor (rhodopsin family);; Serpentine type 7TM GPCR chemoreceptor Srw;; Serpentine type 7TM GPCR chemoreceptor Srsx;; Serpentine type 7TM GPCR chemoreceptor Srx	--	S	Function unknown	hypothetical protein HELRODRAFT_122641, partial [Helobdella robusta]
F01.PB6104	--	--	--	--	--	--	--	--	--	S	Function unknown	--
F01.PB80	--	--	--	--	--	--	--	EF hand;; EF-hand domain pair;; EF-hand domain;; EF hand;; EF-hand domain pair;; Secreted protein acidic and rich in cysteine Ca binding region	--	--	--	hypothetical protein CGI_10020276 [Crassostrea gigas]
F01.PB14096	--	--	--	--	--	--	--	von Willebrand factor type C domain	Putative epidermal cell surface receptor (Precursor) GN=sas OS=Drosophila melanogaster (Fruit fly) PE=2 SV=2	--	--	Collagen alpha-4(VI) chain [Crassostrea gigas]
F01.PB15582	[Q]	Secondary metabolites biosynthesis, transport and catabolism	--	K10252|1.97287e-117|lcm:102356793|BCO2; beta-carotene oxygenase 2; K10252 beta,beta-carotene 9',10'-dioxygenase [EC:1.13.11.71] (A)	--	[Q]	Secondary metabolites biosynthesis, transport and catabolism	Retinal pigment epithelial membrane protein;; Retinal pigment epithelial membrane protein	Carotenoid isomerooxygenase GN=ninaB OS=Galleria mellonella (Greater wax moth) PE=1 SV=1	Q	Secondary metabolites biosynthesis, transport and catabolism	hypothetical protein BRAFLDRAFT_124223 [Branchiostoma floridae]
F01.PB5242	--	--	--	--	--	--	--	--	--	--	--	PREDICTED: uncharacterized protein C19orf44 homolog [Aplysia californica]
F01.PB2825	--	--	--	--	--	--	--	Caspase recruitment domain	--	--	--	--
F01.PB5986	--	--	--	--	--	[R]	General function prediction only	CHY zinc finger	--	S	Function unknown	hypothetical protein LOTGIDRAFT_234076 [Lottia gigantea]
F01.PB16566	[Z]	Cytoskeleton	Molecular Function: microtubule motor activity (GO:0003777);; Molecular Function: ATP binding (GO:0005524);; Cellular Component: kinesin complex (GO:0005871);; Cellular Component: microtubule (GO:0005874);; Biological Process: microtubule-based movement (GO:0007018);; Molecular Function: microtubule binding (GO:0008017);;	--	--	[Z]	Cytoskeleton	Kinesin motor domain	Kinesin-related protein 2 GN=kif2 OS=Dictyostelium discoideum (Slime mold) PE=2 SV=1	Z	Cytoskeleton	PREDICTED: ribosome-binding protein 1-like [Aplysia californica]
F01.PB11305	[P]	Inorganic ion transport and metabolism	Molecular Function: catalase activity (GO:0004096);; Molecular Function: heme binding (GO:0020037);; Biological Process: hydrogen peroxide catabolic process (GO:0042744);; Molecular Function: metal ion binding (GO:0046872);; Biological Process: oxidation-reduction process (GO:0055114);;	K03781|0|lgi:LOTGIDRAFT_236064|hypothetical protein; K03781 catalase [EC:1.11.1.6] (A)	ko00380:Tryptophan metabolism;ko00630:Glyoxylate and dicarboxylate metabolism;ko04068:FoxO signaling pathway;ko04146:Peroxisome	[P]	Inorganic ion transport and metabolism	Catalase;; Catalase-related immune-responsive	Catalase GN=Cat OS=Drosophila melanogaster (Fruit fly) PE=1 SV=2	P	Inorganic ion transport and metabolism	catalase [Meretrix meretrix]
F01.PB16649	--	--	--	--	--	--	--	Death domain	--	S	Function unknown	hypothetical protein CGI_10007323 [Crassostrea gigas]
F01.PB11779	[O]	Posttranslational modification, protein turnover, chaperones	Molecular Function: ATP binding (GO:0005524);; Molecular Function: microtubule-severing ATPase activity (GO:0008568);;	K14575|5.07369e-127|lgi:LOTGIDRAFT_230884|hypothetical protein; K14575 AAA family ATPase (A)	ko03008:Ribosome biogenesis in eukaryotes	[O]	Posttranslational modification, protein turnover, chaperones	ATPase family associated with various cellular activities (AAA);; NACHT domain;; Protein of unknown function (DUF815);; ATPase family associated with various cellular activities (AAA);; AAA domain (dynein-related subfamily)	Transitional endoplasmic reticulum ATPase TER94 GN=TER94 OS=Drosophila melanogaster (Fruit fly) PE=1 SV=1	O	Posttranslational modification, protein turnover, chaperones	PREDICTED: spermatogenesis-associated protein 5-like [Metaseiulus occidentalis]
F01.PB5059	--	--	--	--	--	--	--	--	--	--	--	hypothetical protein CGI_10016339 [Crassostrea gigas]
F01.PB4031	--	--	--	K01022|3.37613e-26|lgi:LOTGIDRAFT_166330|hypothetical protein; K01022 keratan sulfate 6-sulfotransferase 1 [EC:2.8.2.21] (A)	ko00533:Glycosaminoglycan biosynthesis - keratan sulfate	--	--	Sulfotransferase domain	--	U	Intracellular trafficking, secretion, and vesicular transport	Carbohydrate sulfotransferase 1, partial [Crassostrea gigas]
F01.PB5896	[R]	General function prediction only	--	K00011|4.65825e-101|lgi:LOTGIDRAFT_207435|hypothetical protein; K00011 aldehyde reductase [EC:1.1.1.21] (A)	ko00040:Pentose and glucuronate interconversions;ko00051:Fructose and mannose metabolism;ko00052:Galactose metabolism;ko00561:Glycerolipid metabolism	[R]	General function prediction only	Aldo/keto reductase family	Aldose reductase B GN=alrB OS=Dictyostelium discoideum (Slime mold) PE=3 SV=2	S	Function unknown	hypothetical protein LOTGIDRAFT_207435 [Lottia gigantea]
F01.PB8944	--	--	--	--	--	--	--	IQ calmodulin-binding motif	--	S	Function unknown	hypothetical protein LOTGIDRAFT_83213, partial [Lottia gigantea]
F01.PB496	[J]	Translation, ribosomal structure and biogenesis	Cellular Component: ribonucleoprotein complex (GO:0030529);;	K02865|4.75942e-51|lgi:LOTGIDRAFT_230263|hypothetical protein; K02865 large subunit ribosomal protein L10Ae (A)	ko03010:Ribosome	[J]	Translation, ribosomal structure and biogenesis	Ribosomal protein L1p/L10e family	60S ribosomal protein L10a-2 GN=RpL10Ab OS=Drosophila melanogaster (Fruit fly) PE=1 SV=2	J	Translation, ribosomal structure and biogenesis	ribosomal protein L10a, partial [Nucula nucleus]
F01.PB15412	[R]	General function prediction only	--	--	--	--	--	von Willebrand factor type A domain;; von Willebrand factor type A domain;; von Willebrand factor type A domain;; Vault protein inter-alpha-trypsin domain	von Willebrand factor A domain-containing protein DDB_G0292028 GN=DDB_G0292028 OS=Dictyostelium discoideum (Slime mold) PE=3 SV=1	S	Function unknown	hypothetical protein LOTGIDRAFT_105230, partial [Lottia gigantea]
F01.PB1068	--	--	--	--	--	--	--	Collagen triple helix repeat (20 copies)	--	--	--	--
F01.PB18169	[C]	Energy production and conversion	--	--	--	[E]	Amino acid transport and metabolism	Sodium:dicarboxylate symporter family	Excitatory amino acid transporter GN=GLT-1 OS=Onchocerca volvulus PE=2 SV=1	C	Energy production and conversion	hypothetical protein LOTGIDRAFT_187793 [Lottia gigantea]
F01.PB20762	--	--	--	--	--	--	--	Reverse transcriptase (RNA-dependent DNA polymerase)	--	S	Function unknown	PREDICTED: uncharacterized protein LOC102804718 [Saccoglossus kowalevskii]
F01.PB1390	--	--	--	K16628|7.24299e-06|umr:103675109|COL7A1; collagen, type VII, alpha 1; K16628 collagen, type VII, alpha (A)	ko04974:Protein digestion and absorption	[W]	Extracellular structures	Collagen triple helix repeat (20 copies)	--	--	--	--
F01.PB10151	[R]	General function prediction only	Molecular Function: GTP binding (GO:0005525);; Biological Process: small GTPase mediated signal transduction (GO:0007264);; Biological Process: protein transport (GO:0015031);;	K07904|1.80535e-83|lgi:LOTGIDRAFT_225073|hypothetical protein; K07904 Ras-related protein Rab-11A (A)	ko04144:Endocytosis	[U]	Intracellular trafficking, secretion, and vesicular transport	Ras family;; Miro-like protein;; ADP-ribosylation factor family;; Elongation factor Tu GTP binding domain;; Ras family;; Miro-like protein	Ras-related protein Rab-11A GN=rab11A OS=Dictyostelium discoideum (Slime mold) PE=1 SV=1	S	Function unknown	hypothetical protein CAPTEDRAFT_226009 [Capitella teleta]
F01.PB4171	--	--	--	--	--	[S]	Function unknown	--	--	S	Function unknown	hypothetical protein BRAFLDRAFT_87997 [Branchiostoma floridae]
F01.PB21580	--	--	--	K06530|1.53382e-159|ame:726883|TEPB, GB11563; thiolester-containing protein B; K06530 CD109 antigen (A)	--	[O]	Posttranslational modification, protein turnover, chaperones	A-macroglobulin complement component;; Alpha-2-macroglobulin family;; A-macroglobulin receptor;; Alpha-macro-globulin thiol-ester bond-forming region;; Prenyltransferase-like;; Prenyltransferase-like;; Alpha-2-macroglobulin family N-terminal region;; MG2 domain	--	S	Function unknown	thioester-containing protein-B [Azumapecten farreri]
F01.PB6843	[G]	Carbohydrate transport and metabolism	Biological Process: carbohydrate metabolic process (GO:0005975);; Molecular Function: fructose 1,6-bisphosphate 1-phosphatase activity (GO:0042132);;	K03841|1.01612e-151|isc:IscW_ISCW005292|fructose-1,6-bisphosphatase, putative (EC:3.1.3.11); K03841 fructose-1,6-bisphosphatase I [EC:3.1.3.11] (A)	ko00010:Glycolysis / Gluconeogenesis;ko00030:Pentose phosphate pathway;ko00051:Fructose and mannose metabolism;ko01200:Carbon metabolism	[G]	Carbohydrate transport and metabolism	Fructose-1-6-bisphosphatase	Fructose-1,6-bisphosphatase GN=fbp OS=Dictyostelium discoideum (Slime mold) PE=3 SV=1	G	Carbohydrate transport and metabolism	Fructose-1,6-bisphosphatase 1 [Crassostrea gigas]
F01.PB21555	--	--	--	K18019|1.19613e-22|tup:102476814|PTPN7; protein tyrosine phosphatase, non-receptor type 7; K18019 tyrosine-protein phosphatase non-receptor type 7 [EC:3.1.3.48] (A)	ko04010:MAPK signaling pathway	[T]	Signal transduction mechanisms	Protein-tyrosine phosphatase	Tyrosine-protein phosphatase corkscrew (Fragment) GN=csw OS=Drosophila simulans (Fruit fly) PE=3 SV=1	T	Signal transduction mechanisms	PREDICTED: receptor-type tyrosine-protein phosphatase O-like [Hydra vulgaris]
F01.PB10296	[A]	RNA processing and modification	--	K18729|2.8435e-99|lgi:LOTGIDRAFT_118950|hypothetical protein; K18729 protein angel (A)	--	[K]	Transcription	Endonuclease/Exonuclease/phosphatase family	Protein angel GN=angel OS=Drosophila melanogaster (Fruit fly) PE=1 SV=2	A	RNA processing and modification	hypothetical protein LOTGIDRAFT_118950 [Lottia gigantea]
F01.PB19838	--	--	--	K18740|4.07794e-26|lgi:LOTGIDRAFT_161292|hypothetical protein; K18740 exonuclease 3'-5' domain-containing protein 1 (A)	--	[L]	Replication, recombination and repair	--	--	S	Function unknown	hypothetical protein LOTGIDRAFT_161292 [Lottia gigantea]
F01.PB14201	[C]	Energy production and conversion	Biological Process: metabolic process (GO:0008152);; Molecular Function: hydrogen ion transmembrane transporter activity (GO:0015078);; Biological Process: ATP hydrolysis coupled proton transport (GO:0015991);; Cellular Component: integral component of membrane (GO:0016021);; Cellular Component: proton-transporting V-type ATPase, V0 domain (GO:0033179);;	K03661|1.78621e-43|ptg:102965568|ATP6V0B; ATPase, H+ transporting, lysosomal 21kDa, V0 subunit b; K03661 V-type H+-transporting ATPase 21kDa proteolipid subunit (A)	ko00190:Oxidative phosphorylation;ko04142:Lysosome;ko04145:Phagosome;ko04721:Synaptic vesicle cycle;ko05152:Tuberculosis;ko05323:Rheumatoid arthritis	[C]	Energy production and conversion	ATP synthase subunit C	V-type proton ATPase 16 kDa proteolipid subunit GN=AAEL000291 OS=Aedes aegypti (Yellowfever mosquito) PE=2 SV=2	C	Energy production and conversion	predicted protein [Nematostella vectensis]
F01.PB18111	--	--	--	--	--	[O]	Posttranslational modification, protein turnover, chaperones	B-box zinc finger;; NHL repeat	--	--	--	E3 ubiquitin-protein ligase TRIM33 [Crassostrea gigas]
F01.PB12982	--	--	--	--	--	--	--	--	--	--	--	hypothetical protein CGI_10023735 [Crassostrea gigas]
F01.PB4605	[P]	Inorganic ion transport and metabolism	Biological Process: single-organism transport (GO:0044765);;	K05320|8.84525e-101|lgi:LOTGIDRAFT_179090|hypothetical protein; K05320 potassium voltage-gated channel Shaw-related subfamily C, invertebrate (A)	--	[P]	Inorganic ion transport and metabolism	BTB/POZ domain;; Ion transport protein;; Ion channel	Potassium voltage-gated channel protein Shaw GN=Shaw OS=Drosophila melanogaster (Fruit fly) PE=2 SV=1	P	Inorganic ion transport and metabolism	Potassium voltage-gated channel protein Shaw [Crassostrea gigas]
F01.PB4802	--	--	--	K03989|4.95838e-17|bfo:BRAFLDRAFT_129974|hypothetical protein; K03989 complement component 4 (A)	--	--	--	A-macroglobulin receptor;; UNC-6/NTR/C345C module	--	S	Function unknown	complement component C3 [Ruditapes decussatus]
F01.PB12045	--	--	--	K14354|4.4646e-71|xma:102216411|solute carrier organic anion transporter family member 4A1-like; K14354 solute carrier organic anion transporter family, member 4A (A)	--	[Q]	Secondary metabolites biosynthesis, transport and catabolism	Organic Anion Transporter Polypeptide (OATP) family;; Organic Anion Transporter Polypeptide (OATP) family	--	P	Inorganic ion transport and metabolism	GK24772 [Drosophila willistoni]
F01.PB9806	--	--	--	--	--	--	--	--	--	--	--	hypothetical protein CGI_10008959 [Crassostrea gigas]
F01.PB9245	--	--	--	--	--	[S]	Function unknown	--	--	U	Intracellular trafficking, secretion, and vesicular transport	Protein YIPF3 [Crassostrea gigas]
F01.PB20859	[C]	Energy production and conversion	Molecular Function: NAD(P)+ transhydrogenase (AB-specific) activity (GO:0008750);; Biological Process: proton transport (GO:0015992);; Cellular Component: integral component of membrane (GO:0016021);; Molecular Function: NADP binding (GO:0050661);; Biological Process: oxidation-reduction process (GO:0055114);;	K00323|0|hro:HELRODRAFT_113658|hypothetical protein; K00323 NAD(P) transhydrogenase [EC:1.6.1.2] (A)	ko00760:Nicotinate and nicotinamide metabolism	--	--	NAD(P) transhydrogenase beta subunit;; Domain of unknown function (DUF3814)	--	C	Energy production and conversion	NAD(P) transhydrogenase, mitochondrial [Crassostrea gigas]
F01.PB20140	--	--	Cellular Component: membrane (GO:0016020);; Biological Process: single-organism cellular process (GO:0044763);; Biological Process: single-organism transport (GO:0044765);;	K15103|1.13062e-74|ola:101167019|mitochondrial uncoupling protein 2-like; K15103 solute carrier family 25 (mitochondrial uncoupling protein), member 8/9 (A)	--	[C]	Energy production and conversion	Mitochondrial carrier protein;; Mitochondrial carrier protein	Mitochondrial substrate carrier family protein ucpB GN=ucpB OS=Dictyostelium discoideum (Slime mold) PE=3 SV=1	O	Posttranslational modification, protein turnover, chaperones	PREDICTED: mitochondrial uncoupling protein 2-like, partial [Strongylocentrotus purpuratus]
F01.PB1126	[J]	Translation, ribosomal structure and biogenesis	Molecular Function: structural constituent of ribosome (GO:0003735);; Molecular Function: DNA-(apurinic or apyrimidinic site) lyase activity (GO:0003906);; Cellular Component: ribosome (GO:0005840);; Biological Process: translational elongation (GO:0006414);; Biological Process: ribosome biogenesis (GO:0042254);;	K02941|4.65992e-111|lgi:LOTGIDRAFT_237709|hypothetical protein; K02941 large subunit ribosomal protein LP0 (A)	ko03010:Ribosome	[J]	Translation, ribosomal structure and biogenesis	60s Acidic ribosomal protein;; Ribosomal protein L10	60S acidic ribosomal protein P0 GN=RpLP0 OS=Drosophila melanogaster (Fruit fly) PE=1 SV=1	J	Translation, ribosomal structure and biogenesis	60S acidic ribosomal protein P0 [Crassostrea gigas]
F01.PB12345	[M]	Cell wall/membrane/envelope biogenesis	--	--	--	[MW]	--	Fasciclin domain	--	M	Cell wall/membrane/envelope biogenesis	fasciclin-like protein precursor [Aplysia californica]
F01.PB10665	--	--	--	K08220|0|lgi:LOTGIDRAFT_183755|hypothetical protein; K08220 MFS transporter, FLVCR family, feline leukemia virus subgroup C receptor-related protein (A)	--	[R]	General function prediction only	Major Facilitator Superfamily	Uncharacterized MFS-type transporter C09D4.1 GN=C09D4.1 OS=Caenorhabditis elegans PE=3 SV=2	U	Intracellular trafficking, secretion, and vesicular transport	Feline leukemia virus subgroup C receptor-related protein 2 [Crassostrea gigas]
F01.PB15766	--	--	--	K05401|1.90896e-25|mze:101485139|toll-like receptor 3-like; K05401 toll-like receptor 3 (A)	ko04620:Toll-like receptor signaling pathway;ko05168:Herpes simplex infection	[T]	Signal transduction mechanisms	Leucine rich repeat;; Leucine Rich repeats (2 copies);; TIR domain;; Leucine Rich Repeat;; Leucine Rich repeat;; Leucine rich repeat	--	S	Function unknown	toll-like receptor 2 [Crassostrea gigas]
F01.PB2750	[R]	General function prediction only	--	K07891|1.88787e-44|spu:585164|ras-related protein Rab-31-like; K07891 Ras-related protein Rab-22 (A)	ko04144:Endocytosis	[U]	Intracellular trafficking, secretion, and vesicular transport	Ras family;; Miro-like protein;; ADP-ribosylation factor family;; Elongation factor Tu GTP binding domain;; 50S ribosome-binding GTPase	Ras-related protein Rab-1B (Precursor) GN=rab1B OS=Dictyostelium discoideum (Slime mold) PE=2 SV=2	S	Function unknown	PREDICTED: ras-related protein Rab-31-like [Strongylocentrotus purpuratus]
F01.PB4431	--	--	Biological Process: metabolic process (GO:0008152);;	--	--	[P]	Inorganic ion transport and metabolism	Frataxin-like domain	Frataxin homolog, mitochondrial (Precursor) GN=fh OS=Drosophila melanogaster (Fruit fly) PE=2 SV=1	P	Inorganic ion transport and metabolism	hypothetical protein LOTGIDRAFT_126633 [Lottia gigantea]
F01.PB8103	--	--	--	--	--	[T]	Signal transduction mechanisms	Mab-21 protein	--	O	Posttranslational modification, protein turnover, chaperones	predicted protein [Nematostella vectensis]
F01.PB13001	[F]	Nucleotide transport and metabolism	Molecular Function: IMP cyclohydrolase activity (GO:0003937);; Molecular Function: phosphoribosylaminoimidazolecarboxamide formyltransferase activity (GO:0004643);; Biological Process: purine nucleotide biosynthetic process (GO:0006164);;	K00602|0|lgi:LOTGIDRAFT_217098|hypothetical protein; K00602 phosphoribosylaminoimidazolecarboxamide formyltransferase / IMP cyclohydrolase [EC:2.1.2.3 3.5.4.10] (A)	ko00230:Purine metabolism;ko00670:One carbon pool by folate	[F]	Nucleotide transport and metabolism	AICARFT/IMPCHase bienzyme;; MGS-like domain	IMP cyclohydrolase GN=purH OS=Dictyostelium discoideum (Slime mold) PE=1 SV=1	F	Nucleotide transport and metabolism	PREDICTED: bifunctional purine biosynthesis protein PURH-like isoform X2 [Aplysia californica]
F01.PB17730	--	--	--	--	--	--	--	PMP-22/EMP/MP20/Claudin family	--	--	--	--
F01.PB4563	--	--	--	--	--	--	--	Primase C terminal 1 (PriCT-1);; Protein of unknown function (DUF938)	--	S	Function unknown	microtubule-associated protein, putative [Trypanosoma brucei gambiense DAL972]
F01.PB15681	--	--	Molecular Function: peptidase activity (GO:0008233);;	K01379|9.00854e-26|bfo:BRAFLDRAFT_67687|hypothetical protein; K01379 cathepsin D [EC:3.4.23.5] (A)	ko04142:Lysosome	[O]	Posttranslational modification, protein turnover, chaperones	Eukaryotic aspartyl protease	Aspartic protease 3 (Precursor) GN=asp-3 OS=Caenorhabditis elegans PE=1 SV=3	O	Posttranslational modification, protein turnover, chaperones	aspartic proteinase [Sitophilus zeamais]
F01.PB14444	[R]	General function prediction only	--	K14555|0|cmk:103186841|tbl3; transducin (beta)-like 3; K14555 U3 small nucleolar RNA-associated protein 13 (A)	ko03008:Ribosome biogenesis in eukaryotes	[A]	RNA processing and modification	WD domain, G-beta repeat;; WD domain, G-beta repeat;; Utp13 specific WD40 associated domain	F-box/WD repeat-containing protein lin-23 GN=lin-23 OS=Caenorhabditis elegans PE=1 SV=2	S	Function unknown	Transducin beta-like protein 3 [Crassostrea gigas]
F01.PB6881	--	--	Molecular Function: sequence-specific DNA binding transcription factor activity (GO:0003700);; Cellular Component: nucleus (GO:0005634);; Biological Process: regulation of transcription, DNA-templated (GO:0006355);; Biological Process: hippo signaling (GO:0035329);;	K09448|0|lgi:LOTGIDRAFT_210691|hypothetical protein; K09448 transcriptional enhancer factor (A)	--	[K]	Transcription	TEA/ATTS domain family	Protein scalloped GN=sd OS=Drosophila melanogaster (Fruit fly) PE=1 SV=1	K	Transcription	hypothetical protein LOTGIDRAFT_210691 [Lottia gigantea]
F01.PB12370	[E]	Amino acid transport and metabolism	Molecular Function: glutamate-ammonia ligase activity (GO:0004356);; Biological Process: glutamine biosynthetic process (GO:0006542);;	K01915|0|lgi:LOTGIDRAFT_230064|hypothetical protein; K01915 glutamine synthetase [EC:6.3.1.2] (A)	ko00250:Alanine, aspartate and glutamate metabolism;ko00330:Arginine and proline metabolism;ko00630:Glyoxylate and dicarboxylate metabolism;ko00910:Nitrogen metabolism;ko01230:Biosynthesis of amino acids	[E]	Amino acid transport and metabolism	Glutamine synthetase, catalytic domain;; Glutamine synthetase, beta-Grasp domain	Glutamine synthetase 2 cytoplasmic GN=Gs2 OS=Drosophila melanogaster (Fruit fly) PE=2 SV=3	E	Amino acid transport and metabolism	Glutamine synthetase [Crassostrea gigas]
F01.PB8520	[E]	Amino acid transport and metabolism	--	K14638|1.39998e-138|lgi:LOTGIDRAFT_229242|hypothetical protein; K14638 solute carrier family 15 (peptide/histidine transporter), member 3/4 (A)	--	[E]	Amino acid transport and metabolism	POT family	Peptide transporter family 1 GN=yin OS=Drosophila melanogaster (Fruit fly) PE=1 SV=2	E	Amino acid transport and metabolism	Solute carrier family 15 member 4 [Crassostrea gigas]
F01.PB6229	[O]	Posttranslational modification, protein turnover, chaperones	Molecular Function: peptidase activity (GO:0008233);;	--	--	[O]	Posttranslational modification, protein turnover, chaperones	Papain family cysteine protease;; Cathepsin propeptide inhibitor domain (I29);; Papain family cysteine protease	Digestive cysteine proteinase 3 (Precursor) GN=LCP3 OS=Homarus americanus (American lobster) PE=2 SV=1	O	Posttranslational modification, protein turnover, chaperones	cathepsin L [Cyclina sinensis]
F01.PB22537	[O]	Posttranslational modification, protein turnover, chaperones	Cellular Component: ribosome (GO:0005840);; Cellular Component: microtubule associated complex (GO:0005875);; Biological Process: phagocytosis (GO:0006909);; Biological Process: cellular process (GO:0009987);;	--	--	[OR]	--	Ubiquitin family;; Ubiquitin-2 like Rad60 SUMO-like;; Ubiquitin-like domain;; Telomere stability and silencing;; Ubiquitin-2 like Rad60 SUMO-like;; DUF2407 ubiquitin-like domain;; Protein of unknown function (DUF2870);; GLUT4 regulating protein TUG;; FlgD Ig-like domain;; Ubiquitin family;; Ubiquitin-2 like Rad60 SUMO-like;; Ubiquitin-like domain;; Telomere stability and silencing;; Ubiquitin-2 l…	Ubiquitin (Precursor) GN=Ubi-p63E OS=Drosophila melanogaster (Fruit fly) PE=3 SV=1	O	Posttranslational modification, protein turnover, chaperones	PREDICTED: uncharacterized protein LOC754856 [Strongylocentrotus purpuratus]
F01.PB22347	--	--	--	--	--	--	--	--	--	S	Function unknown	hypothetical protein M514_28088 [Trichuris suis]
F01.PB11843	--	--	--	--	--	[R]	General function prediction only	--	Putative zinc finger protein B0310.2 GN=B0310.2 OS=Caenorhabditis elegans PE=3 SV=1	S	Function unknown	hypothetical protein CAPTEDRAFT_131093 [Capitella teleta]
F01.PB11679	[G]	Carbohydrate transport and metabolism	--	K18622|0|lgi:LOTGIDRAFT_115246|hypothetical protein; K18622 adducin (A)	--	[TZ]	--	Class II Aldolase and Adducin N-terminal domain	Protein hu-li tai shao GN=hts OS=Drosophila melanogaster (Fruit fly) PE=1 SV=2	G	Carbohydrate transport and metabolism	Protein hu-li tai shao [Crassostrea gigas]
F01.PB6115	--	--	--	--	--	--	--	von Willebrand factor type A domain;; Sec23/Sec24 trunk domain;; Sec23/Sec24 zinc finger	Circularly permutated Ras protein 1 GN=cpras1 OS=Dictyostelium discoideum (Slime mold) PE=3 SV=1	S	Function unknown	Circularly permutated Ras protein 1 [Crassostrea gigas]
F01.PB22014	--	--	--	--	--	--	--	--	--	S	Function unknown	hypothetical protein CAPTEDRAFT_155045 [Capitella teleta]
F01.PB4053	--	--	--	--	--	--	--	C1q domain;; C1q domain	--	S	Function unknown	Cerebellin-3 [Crassostrea gigas]
F01.PB17784	--	--	--	K18179|1.17213e-10|mze:101475621|cytochrome c oxidase assembly factor 6 homolog; K18179 cytochrome c oxidase assembly factor 6 (A)	--	[C]	Energy production and conversion	Cytochrome oxidase c subunit VIb	--	O	Posttranslational modification, protein turnover, chaperones	cytochrome C oxidase, subunit VIb/COX12, putative [Ixodes scapularis]
F01.PB15462	--	--	--	--	--	--	--	--	--	S	Function unknown	PREDICTED: histone-lysine N-methyltransferase SETMAR-like [Bombyx mori]
F01.PB12321	--	--	--	--	--	[S]	Function unknown	Glycosyltransferase family 92	--	S	Function unknown	hypothetical protein LOTGIDRAFT_231694 [Lottia gigantea]
F01.PB12835	[N]	Cell motility	Biological Process: protein transport (GO:0015031);;	K12191|8.47818e-92|lgi:LOTGIDRAFT_203241|hypothetical protein; K12191 charged multivesicular body protein 2A (A)	ko04144:Endocytosis	[U]	Intracellular trafficking, secretion, and vesicular transport	Snf7	Charged multivesicular body protein 2a homolog 2 GN=chmp2a2 OS=Dictyostelium discoideum (Slime mold) PE=3 SV=1	N	Cell motility	PREDICTED: charged multivesicular body protein 2a-like isoform X1 [Aplysia californica]
F01.PB13910	--	--	--	--	--	[S]	Function unknown	Protein of unknown function (DUF2435);; HEAT repeat;; Domain of unknown function (DUF2411)	--	S	Function unknown	Transmembrane and coiled-coil domain-containing protein 7 [Crassostrea gigas]
F01.PB3846	--	--	Molecular Function: holocytochrome-c synthase activity (GO:0004408);; Cellular Component: mitochondrial inner membrane (GO:0005743);; Biological Process: cytochrome c-heme linkage (GO:0018063);;	K01764|1.1168e-76|cin:100181858|cytochrome c-type heme lyase; K01764 cytochrome c heme-lyase [EC:4.4.1.17] (A)	ko00860:Porphyrin and chlorophyll metabolism	[CO]	--	Cytochrome c/c1 heme lyase	Probable cytochrome c-type heme lyase GN=cchl-1 OS=Caenorhabditis elegans PE=3 SV=1	O	Posttranslational modification, protein turnover, chaperones	PREDICTED: cytochrome c-type heme lyase [Ciona intestinalis]
F01.PB841	--	--	--	--	--	--	--	WSTF, HB1, Itc1p, MBD9 motif 1	--	--	--	--
F01.PB16365	--	--	--	K16726|7.51764e-35|clv:102095006|ANKRD17; ankyrin repeat domain 17; K16726 ankyrin repeat domain-containing protein 17 (A)	--	[T]	Signal transduction mechanisms	KH domain;; KH domain	Ankyrin repeat and KH domain-containing protein mask OS=Drosophila melanogaster (Fruit fly) PE=1 SV=2	S	Function unknown	Ankyrin repeat domain-containing protein 17 [Crassostrea gigas]
F01.PB21707	[R]	General function prediction only	--	K09454|9.32237e-68|myd:102757378|GABPB1; GA binding protein transcription factor, beta subunit 1; K09454 GA-binding protein transcription factor, beta (A)	--	--	--	Ankyrin repeats (3 copies);; Ankyrin repeat;; Ankyrin repeats (many copies);; Ankyrin repeat;; Ankyrin repeats (many copies)	Tankyrase OS=Drosophila melanogaster (Fruit fly) PE=1 SV=1	S	Function unknown	GA-binding protein subunit beta-1 [Crassostrea gigas]
F01.PB21983	--	--	--	K10380|0|lgi:LOTGIDRAFT_235987|hypothetical protein; K10380 ankyrin (A)	--	[M]	Cell wall/membrane/envelope biogenesis	ZU5 domain;; Death domain	--	S	Function unknown	hypothetical protein LOTGIDRAFT_235987 [Lottia gigantea]
F01.PB15644	--	--	--	--	--	--	--	DDE superfamily endonuclease;; Helix-turn-helix of DDE superfamily endonuclease;; THAP domain	--	--	--	PREDICTED: uncharacterized protein LOC100367476 [Saccoglossus kowalevskii]
F01.PB8248	--	--	--	--	--	--	--	Domain of unknown function (DUF3504)	--	S	Function unknown	hypothetical protein CGI_10026450 [Crassostrea gigas]
F01.PB15987	--	--	--	--	--	--	--	--	--	--	--	Suppressor of cytokine signaling 5 [Crassostrea gigas]
F01.PB6390	[KR]	--	--	--	--	[R]	General function prediction only	Acetyltransferase (GNAT) family	--	S	Function unknown	hypothetical protein LOTGIDRAFT_56489, partial [Lottia gigantea]
F01.PB17315	--	--	--	K06530|2.29174e-162|bfo:BRAFLDRAFT_120995|hypothetical protein; K06530 CD109 antigen (A)	--	[O]	Posttranslational modification, protein turnover, chaperones	A-macroglobulin complement component;; A-macroglobulin receptor;; Alpha-macro-globulin thiol-ester bond-forming region;; Prenyltransferase-like;; Prenyltransferase-like;; Alpha-2-macroglobulin family N-terminal region	--	S	Function unknown	hypothetical protein CGI_10015501 [Crassostrea gigas]
F01.PB16470	[E]	Amino acid transport and metabolism	Molecular Function: nucleotide binding (GO:0000166);; Biological Process: asparagine biosynthetic process (GO:0006529);; Molecular Function: ligase activity (GO:0016874);;	K01953|0|lgi:LOTGIDRAFT_201958|hypothetical protein; K01953 asparagine synthase (glutamine-hydrolysing) [EC:6.3.5.4] (A)	ko00250:Alanine, aspartate and glutamate metabolism	[E]	Amino acid transport and metabolism	Asparagine synthase;; Glutamine amidotransferase domain;; Glutamine amidotransferase domain;; Glutamine amidotransferases class-II	Probable asparagine synthetase [glutamine-hydrolyzing] GN=asns OS=Dictyostelium discoideum (Slime mold) PE=1 SV=1	E	Amino acid transport and metabolism	Asparagine synthetase [glutamine-hydrolyzing] [Crassostrea gigas]
F01.PB17735	--	--	--	K02907|3.10715e-20|hro:HELRODRAFT_112773|hypothetical protein; K02907 large subunit ribosomal protein L30 (A)	ko03010:Ribosome	[J]	Translation, ribosomal structure and biogenesis	Ribosomal protein L30p/L7e	--	J	Translation, ribosomal structure and biogenesis	PREDICTED: uncharacterized protein LOC101852481 [Aplysia californica]
F01.PB11991	[G]	Carbohydrate transport and metabolism	Molecular Function: hydrolase activity, hydrolyzing O-glycosyl compounds (GO:0004553);; Biological Process: chitin metabolic process (GO:0006030);;	K01183|1.38971e-120|bfo:BRAFLDRAFT_281651|hypothetical protein; K01183 chitinase [EC:3.2.1.14] (A)	ko00520:Amino sugar and nucleotide sugar metabolism	[G]	Carbohydrate transport and metabolism	Glycosyl hydrolases family 18;; Glycosyl hydrolases family 18	Endochitinase (Precursor) OS=Brugia malayi (Filarial nematode worm) PE=1 SV=1	G	Carbohydrate transport and metabolism	chitinase-3 [Hyriopsis cumingii]
F01.PB13739	--	--	Molecular Function: metal ion binding (GO:0046872);;	--	--	[O]	Posttranslational modification, protein turnover, chaperones	--	--	S	Function unknown	hypothetical protein CGI_10028226 [Crassostrea gigas]
F01.PB20550	--	--	--	--	--	--	--	Regulator of G protein signaling domain	--	S	Function unknown	Regulator of G-protein signaling 22 [Crassostrea gigas]
F01.PB12486	--	--	--	K06530|0|lgi:LOTGIDRAFT_162872|hypothetical protein; K06530 CD109 antigen (A)	--	[O]	Posttranslational modification, protein turnover, chaperones	Alpha-2-macroglobulin family N-terminal region;; Alpha-2-macroglobulin family;; A-macroglobulin complement component;; A-macroglobulin receptor;; A-macroglobulin complement component;; Prenyltransferase-like;; MG2 domain	--	S	Function unknown	thioester-containing protein-D [Azumapecten farreri]
F01.PB13537	--	--	--	--	--	--	--	--	--	S	Function unknown	hypothetical protein BRAFLDRAFT_91636 [Branchiostoma floridae]
F01.PB17091	--	--	--	--	--	[T]	Signal transduction mechanisms	F5/8 type C domain	Cell death abnormality protein 1 {ECO:0000303|PubMed:11163239} (Precursor) OS=Caenorhabditis elegans PE=1 SV=1	S	Function unknown	Multiple epidermal growth factor-like domains 11 [Crassostrea gigas]
F01.PB10732	[P]	Inorganic ion transport and metabolism	Molecular Function: inorganic phosphate transmembrane transporter activity (GO:0005315);; Biological Process: phosphate ion transport (GO:0006817);; Cellular Component: membrane (GO:0016020);;	K14640|5.61375e-91|lgi:LOTGIDRAFT_239412|hypothetical protein; K14640 solute carrier family 20 (sodium-dependent phosphate transporter) (A)	--	[P]	Inorganic ion transport and metabolism	Phosphate transporter family;; Phosphate transporter family	--	P	Inorganic ion transport and metabolism	hypothetical protein CAPTEDRAFT_119196 [Capitella teleta]
F01.PB14707	[KL]	--	Biological Process: DNA synthesis involved in DNA repair (GO:0000731);; Molecular Function: DNA binding (GO:0003677);; Molecular Function: helicase activity (GO:0004386);; Molecular Function: ATP binding (GO:0005524);; Biological Process: chromatin remodeling (GO:0006338);; Biological Process: regulation of translation (GO:0006417);; Biological Process: reciprocal meiotic recombination (GO:000713…	K10875|0|bfo:BRAFLDRAFT_281964|hypothetical protein; K10875 DNA repair and recombination protein RAD54 and RAD54-like protein [EC:3.6.4.-] (A)	ko03440:Homologous recombination	[L]	Replication, recombination and repair	Helicase conserved C-terminal domain;; SNF2 family N-terminal domain;; Rad54 N terminal;; SNF2 family N-terminal domain	DNA repair and recombination protein RAD54-like {ECO:0000250|UniProtKB:O76460} OS=Drosophila willistoni (Fruit fly) PE=3 SV=1	L	Replication, recombination and repair	hypothetical protein BRAFLDRAFT_281964 [Branchiostoma floridae]
F01.PB13087	[E]	Amino acid transport and metabolism	--	K13780|8.77474e-139|lgi:LOTGIDRAFT_179020|hypothetical protein; K13780 solute carrier family 7 (L-type amino acid transporter), member 5 (A)	--	[E]	Amino acid transport and metabolism	Amino acid permease;; Amino acid permease	--	E	Amino acid transport and metabolism	Large neutral amino acids transporter small subunit 2 [Crassostrea gigas]
F01.PB1514	--	--	--	--	--	--	--	Corticotropin-releasing factor binding protein (CRF-BP)	--	S	Function unknown	hypothetical protein LOTGIDRAFT_131128 [Lottia gigantea]
F01.PB11051	[RTKL]	--	Molecular Function: kinase activity (GO:0016301);;	K08857|5.22582e-59|lgi:LOTGIDRAFT_219034|hypothetical protein; K08857 NIMA (never in mitosis gene a)-related kinase [EC:2.7.11.1] (A)	--	[R]	General function prediction only	Protein kinase domain;; Protein tyrosine kinase;; Protein kinase domain;; Protein tyrosine kinase	Probable serine/threonine-protein kinase nek3 GN=nek3 OS=Dictyostelium discoideum (Slime mold) PE=3 SV=1	T	Signal transduction mechanisms	Serine/threonine-protein kinase Nek4 [Crassostrea gigas]
F01.PB8943	--	--	--	K14611|2.29173e-137|lgi:LOTGIDRAFT_215319|hypothetical protein; K14611 solute carrier family 23 (nucleobase transporter), member 1/2 (A)	--	[F]	Nucleotide transport and metabolism	Permease family;; Permease family;; Permease family	--	F	Nucleotide transport and metabolism	Solute carrier family 23 member 2 [Crassostrea gigas]
F01.PB153	--	--	--	--	--	[R]	General function prediction only	Domain of unknown function (DUF814)	Coiled-coil domain-containing protein 25 homolog GN=ccdc25 OS=Dictyostelium discoideum (Slime mold) PE=3 SV=1	S	Function unknown	PREDICTED: coiled-coil domain-containing protein 25-like [Aplysia californica]
F01.PB17574	--	--	--	--	--	--	--	Zona pellucida-like domain	--	--	--	cuticlin-like family member (cutl-26) [Ascaris suum]
F01.PB350	--	--	--	--	--	--	--	--	Orcokinin-1(1-10) {ECO:0000303|PubMed:19137558} (Precursor) OS=Rhodnius prolixus (Triatomid bug) PE=1 SV=1	S	Function unknown	pedal peptide precursor protein [Helix lucorum]
F01.PB4503	--	--	--	--	--	--	--	BTB/POZ domain	BTB and MATH domain-containing protein 38 GN=bath-38 OS=Caenorhabditis elegans PE=3 SV=1	S	Function unknown	BTB and MATH domain-containing protein 38 [Crassostrea gigas]
F01.PB3000	[RTKL]	--	Biological Process: cellular process (GO:0009987);;	K11715|1.41394e-42|aml:100478511|serine/threonine-protein kinase/endoribonuclease IRE2-like; K11715 serine/threonine-protein kinase/endoribonuclease IRE2 [EC:2.7.11.1 3.1.26.-] (A)	--	[T]	Signal transduction mechanisms	Protein kinase domain;; Ribonuclease 2-5A;; Protein tyrosine kinase	Endoribonuclease (Precursor) GN=ire-1 OS=Caenorhabditis elegans PE=2 SV=2	T	Signal transduction mechanisms	PREDICTED: LOW QUALITY PROTEIN: serine/threonine-protein kinase/endoribonuclease IRE1-like [Saccoglossus kowalevskii]
F01.PB1295	[R]	General function prediction only	--	K03102|1.61316e-40|lgi:LOTGIDRAFT_56504|hypothetical protein; K03102 squid (A)	ko04320:Dorso-ventral axis formation	[R]	General function prediction only	RNA recognition motif. (a.k.a. RRM, RBD, or RNP domain);; RNA recognition motif (a.k.a. RRM, RBD, or RNP domain);; RNA recognition motif. (a.k.a. RRM, RBD, or RNP domain)	RNA-binding protein squid GN=sqd OS=Drosophila melanogaster (Fruit fly) PE=1 SV=3	S	Function unknown	PREDICTED: heterogeneous nuclear ribonucleoprotein D-like-B-like isoform X4 [Aplysia californica]
F01.PB9077	[R]	General function prediction only	Molecular Function: SNARE binding (GO:0000149);; Molecular Function: transporter activity (GO:0005215);; Molecular Function: calcium ion binding (GO:0005509);; Biological Process: synaptic vesicle exocytosis (GO:0016079);; Cellular Component: cell junction (GO:0030054);; Cellular Component: integral component of synaptic vesicle membrane (GO:0030285);; Molecular Function: 1-phosphatidylinositol-4…	K15290|2.54868e-104|lgi:LOTGIDRAFT_249360|Syt1; synaptotagmin 1; K15290 synaptotagmin-1 (A)	--	[TU]	--	C2 domain	Synaptotagmin-1 GN=SYT1 OS=Aplysia californica (California sea hare) PE=1 SV=2	S	Function unknown	synaptotagmin 1 variant [Lottia gigantea]
F01.PB12863	--	--	--	--	--	--	--	Ankyrin repeats (3 copies);; Ankyrin repeat;; Ankyrin repeat;; Ankyrin repeats (many copies);; Ankyrin repeats (many copies)	--	--	--	hypothetical protein CGI_10024519 [Crassostrea gigas]
F01.PB4227	--	--	--	--	--	--	--	Sushi domain (SCR repeat)	--	--	--	--
F01.PB20883	--	--	Molecular Function: protein tyrosine phosphatase activity (GO:0004725);; Molecular Function: calcium ion binding (GO:0005509);; Biological Process: peptidyl-tyrosine dephosphorylation (GO:0035335);;	K06114|0|lgi:LOTGIDRAFT_202396|hypothetical protein; K06114 spectrin alpha (A)	--	[Z]	Cytoskeleton	Spectrin repeat;; Ca2+ insensitive EF hand;; EF hand;; EF-hand domain pair;; EF hand;; EF-hand domain pair;; EF-hand domain	Spectrin alpha chain GN=alpha-Spec OS=Drosophila melanogaster (Fruit fly) PE=1 SV=2	Z	Cytoskeleton	hypothetical protein LOTGIDRAFT_202396 [Lottia gigantea]
F01.PB19766	--	--	--	--	--	--	--	--	--	S	Function unknown	PREDICTED: c-Maf-inducing protein-like [Aplysia californica]
F01.PB4878	--	--	Biological Process: mRNA splicing, via spliceosome (GO:0000398);; Cellular Component: spliceosomal complex (GO:0005681);; Molecular Function: pre-mRNA intronic binding (GO:0097157);;	K12874|0|lgi:LOTGIDRAFT_227972|hypothetical protein; K12874 intron-binding protein aquarius (A)	ko03040:Spliceosome	[L]	Replication, recombination and repair	AAA domain;; AAA domain	Regulator of nonsense transcripts 1 GN=upf1 OS=Dictyostelium discoideum (Slime mold) PE=3 SV=1	S	Function unknown	hypothetical protein LOTGIDRAFT_227972 [Lottia gigantea]
F01.PB1263	[F]	Nucleotide transport and metabolism	Molecular Function: ribonucleoside-diphosphate reductase activity, thioredoxin disulfide as acceptor (GO:0004748);; Cellular Component: ribonucleoside-diphosphate reductase complex (GO:0005971);; Biological Process: DNA replication (GO:0006260);; Biological Process: activation of cysteine-type endopeptidase activity involved in apoptotic process (GO:0006919);; Biological Process: deoxyribonucleos…	K10808|0|mdo:100031990|RRM2; ribonucleotide reductase M2; K10808 ribonucleoside-diphosphate reductase subunit M2 [EC:1.17.4.1] (A)	ko00230:Purine metabolism;ko00240:Pyrimidine metabolism;ko00480:Glutathione metabolism;ko04115:p53 signaling pathway	[F]	Nucleotide transport and metabolism	Ribonucleotide reductase, small chain	Ribonucleoside-diphosphate reductase small chain OS=Spisula solidissima (Atlantic surf-clam) PE=2 SV=2	F	Nucleotide transport and metabolism	RecName: Full=Ribonucleoside-diphosphate reductase small chain; AltName: Full=Ribonucleotide reductase small subunit; AltName: Full=p41 [Spisula solidissima]
F01.PB5021	[I]	Lipid transport and metabolism	Molecular Function: oxidoreductase activity, acting on the CH-OH group of donors, NAD or NADP as acceptor (GO:0016616);; Biological Process: single-organism metabolic process (GO:0044710);; Molecular Function: coenzyme binding (GO:0050662);;	K13247|1.21246e-111|lgi:LOTGIDRAFT_189928|hypothetical protein; K13247 L-gulonate 3-dehydrogenase [EC:1.1.1.45] (A)	ko00040:Pentose and glucuronate interconversions	[I]	Lipid transport and metabolism	3-hydroxyacyl-CoA dehydrogenase, NAD binding domain;; 3-hydroxyacyl-CoA dehydrogenase, C-terminal domain;; NAD binding domain of 6-phosphogluconate dehydrogenase	Probable 3-hydroxyacyl-CoA dehydrogenase B0272.3 GN=B0272.3 OS=Caenorhabditis elegans PE=1 SV=1	I	Lipid transport and metabolism	Lambda-crystallin-like protein [Crassostrea gigas]
F01.PB8869	--	--	Cellular Component: nuclear chromosome (GO:0000228);; Biological Process: chromatin remodeling (GO:0006338);;	K11648|2.42727e-141|hro:HELRODRAFT_185604|hypothetical protein; K11648 SWI/SNF-related matrix-associated actin-dependent regulator of chromatin subfamily B member 1 (A)	--	[BK]	--	SNF5 / SMARCB1 / INI1	--	K	Transcription	PREDICTED: SWI/SNF-related matrix-associated actin-dependent regulator of chromatin subfamily B member 1-like [Aplysia californica]
F01.PB6831	--	--	--	K03456|0|lgi:LOTGIDRAFT_219170|hypothetical protein; K03456 serine/threonine-protein phosphatase 2A regulatory subunit A (A)	ko03015:mRNA surveillance pathway;ko04350:TGF-beta signaling pathway	[T]	Signal transduction mechanisms	HEAT repeat;; HEAT repeats;; HEAT-like repeat;; Vacuolar 14 Fab1-binding region;; CLASP N terminal	Serine/threonine-protein phosphatase PP2A 65 kDa regulatory subunit GN=Pp2A-29B OS=Drosophila melanogaster (Fruit fly) PE=2 SV=4	T	Signal transduction mechanisms	Serine/threonine-protein phosphatase 2A 65 kDa regulatory subunit A alpha isoform [Crassostrea gigas]
F01.PB11181	--	--	Molecular Function: transferase activity (GO:0016740);;	K00731|4.27606e-91|lgi:LOTGIDRAFT_143711|hypothetical protein; K00731 glycoprotein-N-acetylgalactosamine 3-beta-galactosyltransferase [EC:2.4.1.122] (A)	ko00512:Mucin type O-Glycan biosynthesis	[G]	Carbohydrate transport and metabolism	Fringe-like;; Galactosyltransferase	Glycoprotein-N-acetylgalactosamine 3-beta-galactosyltransferase 1 GN=C1GalTA OS=Drosophila melanogaster (Fruit fly) PE=2 SV=1	S	Function unknown	Glycoprotein-N-acetylgalactosamine 3-beta-galactosyltransferase 1 [Crassostrea gigas]
F01.PB5945	[E]	Amino acid transport and metabolism	Biological Process: proteolysis (GO:0006508);; Molecular Function: serine-type peptidase activity (GO:0008236);;	K05995|2.8855e-76|bfo:BRAFLDRAFT_279226|hypothetical protein; K05995 dipeptidase E [EC:3.4.13.21] (A)	--	--	--	Peptidase family S51	Probable alpha-aspartyl dipeptidase GN=CG2200 OS=Drosophila melanogaster (Fruit fly) PE=1 SV=1	E	Amino acid transport and metabolism	Alpha-aspartyl dipeptidase [Crassostrea gigas]
F01.PB3833	[R]	General function prediction only	Molecular Function: nucleotide binding (GO:0000166);; Molecular Function: nucleic acid binding (GO:0003676);;	--	--	[K]	Transcription	RNA recognition motif. (a.k.a. RRM, RBD, or RNP domain);; RNA recognition motif (a.k.a. RRM, RBD, or RNP domain);; RNA recognition motif. (a.k.a. RRM, RBD, or RNP domain);; SAP domain	RNA-binding protein lark GN=lark OS=Drosophila melanogaster (Fruit fly) PE=1 SV=1	S	Function unknown	Scaffold attachment factor B1 [Crassostrea gigas]
F01.PB10897	[M]	Cell wall/membrane/envelope biogenesis	Cellular Component: extracellular region (GO:0005576);; Molecular Function: zinc ion binding (GO:0008270);; Molecular Function: N-acetylmuramoyl-L-alanine amidase activity (GO:0008745);; Biological Process: peptidoglycan catabolic process (GO:0009253);; Biological Process: defense response to bacterium (GO:0042742);;	--	--	--	--	--	Peptidoglycan-recognition protein LE GN=PGRP-LE OS=Drosophila melanogaster (Fruit fly) PE=1 SV=1	O	Posttranslational modification, protein turnover, chaperones	Peptidoglycan-recognition protein SC2 [Crassostrea gigas]
F01.PB11925	[J]	Translation, ribosomal structure and biogenesis	Molecular Function: nucleotide binding (GO:0000166);; Molecular Function: nucleotidyltransferase activity (GO:0016779);; Biological Process: cellular metabolic process (GO:0044237);; Biological Process: primary metabolic process (GO:0044238);; Biological Process: organic substance metabolic process (GO:0071704);;	K14416|0|gga:421694|HBS1L; HBS1-like (S. cerevisiae); K14416 elongation factor 1 alpha-like protein (A)	ko03015:mRNA surveillance pathway	[J]	Translation, ribosomal structure and biogenesis	Elongation factor Tu GTP binding domain;; HBS1 N-terminus;; Elongation factor Tu C-terminal domain;; Elongation factor Tu domain 2;; 50S ribosome-binding GTPase	Elongation factor 1-alpha 2 GN=Tb10.70.5670 OS=Trypanosoma brucei brucei (strain 927/4 GUTat10.1) PE=1 SV=1	J	Translation, ribosomal structure and biogenesis	HBS1-like protein [Crassostrea gigas]
F01.PB2862	[R]	General function prediction only	Molecular Function: nucleotide binding (GO:0000166);; Molecular Function: nucleic acid binding (GO:0003676);;	--	--	[R]	General function prediction only	RNA recognition motif. (a.k.a. RRM, RBD, or RNP domain);; RNA recognition motif (a.k.a. RRM, RBD, or RNP domain);; RNA recognition motif. (a.k.a. RRM, RBD, or RNP domain)	RNA-binding protein squid GN=sqd OS=Drosophila melanogaster (Fruit fly) PE=1 SV=3	S	Function unknown	RNA-binding protein 24-A [Crassostrea gigas]
F01.PB13832	[L]	Replication, recombination and repair	Molecular Function: ATP binding (GO:0005524);; Biological Process: mismatch repair (GO:0006298);; Molecular Function: mismatched DNA binding (GO:0030983);;	K08740|0|bfo:BRAFLDRAFT_223065|hypothetical protein; K08740 DNA mismatch repair protein MSH4 (A)	--	[L]	Replication, recombination and repair	MutS domain V;; MutS family domain IV;; MutS domain III;; MutS domain II	MutS protein homolog him-14 GN=him-14 OS=Caenorhabditis elegans PE=1 SV=2	L	Replication, recombination and repair	hypothetical protein BRAFLDRAFT_223065 [Branchiostoma floridae]
F01.PB19141	[RTKL]	--	Molecular Function: transferase activity, transferring phosphorus-containing groups (GO:0016772);;	K05410|6.7594e-82|cin:780713|ikk-epsilon; IkappaB kinase; K05410 TANK-binding kinase 1 [EC:2.7.11.10] (A)	--	[T]	Signal transduction mechanisms	Protein kinase domain	Inhibitor of nuclear factor kappa-B kinase subunit beta GN=ird5 OS=Drosophila melanogaster (Fruit fly) PE=1 SV=2	T	Signal transduction mechanisms	Serine/threonine-protein kinase TBK1 [Crassostrea gigas]
F01.PB7004	[OU]	--	Molecular Function: serine-type endopeptidase activity (GO:0004252);; Biological Process: proteolysis (GO:0006508);;	K01358|2.41534e-87|asn:102371817|CLPP; caseinolytic mitochondrial matrix peptidase proteolytic subunit; K01358 ATP-dependent Clp protease, protease subunit [EC:3.4.21.92] (A)	--	[O]	Posttranslational modification, protein turnover, chaperones	Clp protease	ATP-dependent Clp protease proteolytic subunit 1, mitochondrial {ECO:0000250|UniProtKB:Q27539} (Precursor) OS=Caenorhabditis briggsae PE=3 SV=2	O	Posttranslational modification, protein turnover, chaperones	hypothetical protein DAPPUDRAFT_231060 [Daphnia pulex]
F01.PB4895	--	--	--	--	--	[R]	General function prediction only	Immunoglobulin I-set domain;; Immunoglobulin domain;; Alphaherpesvirus glycoprotein E;; Immunoglobulin V-set domain	Twitchin {ECO:0000303|PubMed:7190524} OS=Caenorhabditis elegans PE=1 SV=3	S	Function unknown	hypothetical protein CAPTEDRAFT_193449 [Capitella teleta]
F01.PB19867	--	--	--	K06254|4.59958e-25|lgi:LOTGIDRAFT_210962|hypothetical protein; K06254 agrin (A)	ko04512:ECM-receptor interaction	[O]	Posttranslational modification, protein turnover, chaperones	Kazal-type serine protease inhibitor domain;; Kazal-type serine protease inhibitor domain	Serine protease inhibitor dipetalogastin (Precursor; Fragment) OS=Dipetalogaster maximus (Blood-sucking bug) PE=1 SV=2	O	Posttranslational modification, protein turnover, chaperones	Kazal-type serine protease inhibitor [Pinctada fucata]
F01.PB13228	--	--	--	--	--	[S]	Function unknown	TPR repeat;; Tetratricopeptide repeat;; Tetratricopeptide repeat;; Tetratricopeptide repeat;; Tetratricopeptide repeat;; Anaphase-promoting complex, cyclosome, subunit 3;; Tetratricopeptide repeat;; Tetratricopeptide repeat;; Tetratricopeptide repeat;; Tetratricopeptide repeat	Tetratricopeptide repeat protein 30 homolog GN=dyf-1 OS=Caenorhabditis briggsae PE=3 SV=2	S	Function unknown	PREDICTED: tetratricopeptide repeat protein 30A-like [Aplysia californica]
F01.PB4548	[TZDR]	--	--	K02183|2.35469e-30|lgi:LOTGIDRAFT_216228|hypothetical protein; K02183 calmodulin (A)	ko04070:Phosphatidylinositol signaling system	[T]	Signal transduction mechanisms	EF-hand domain pair;; EF hand;; EF hand;; EF-hand domain;; EF-hand domain pair;; Secreted protein acidic and rich in cysteine Ca binding region;; EF-hand domain;; Cytoskeletal-regulatory complex EF hand	Calmodulin OS=Plasmodium falciparum PE=3 SV=4	DTZ	--	Low-density lipoprotein receptor-related protein 6 [Crassostrea gigas]
F01.PB7342	--	--	Molecular Function: translation elongation factor activity (GO:0003746);; Cellular Component: nucleus (GO:0005634);; Biological Process: translational elongation (GO:0006414);; Biological Process: negative regulation of transcription, DNA-templated (GO:0045892);;	K15180|0|lgi:LOTGIDRAFT_227518|hypothetical protein; K15180 negative elongation factor B (A)	--	--	--	Cofactor of BRCA1 (COBRA1);; Cofactor of BRCA1 (COBRA1)	Negative elongation factor B GN=NELF-B OS=Drosophila melanogaster (Fruit fly) PE=1 SV=1	S	Function unknown	Negative elongation factor B [Crassostrea gigas]
F01.PB17968	--	--	--	--	--	[I]	Lipid transport and metabolism	Acyltransferase	--	I	Lipid transport and metabolism	hypothetical protein LOTGIDRAFT_217193 [Lottia gigantea]
F01.PB9188	--	--	--	K16796|7.34847e-58|lgi:LOTGIDRAFT_184905|hypothetical protein; K16796 transcription factor SOX2 (SOX group B) (A)	--	[K]	Transcription	HMG (high mobility group) box;; SOX transcription factor;; HMG-box domain	SOX domain-containing protein dichaete GN=D OS=Drosophila melanogaster (Fruit fly) PE=2 SV=1	B	Chromatin structure and dynamics	SoxB1 [Sepia officinalis]
F01.PB1918	--	--	--	--	--	--	--	C1q domain	--	--	--	Complement C1q-like protein 4 [Crassostrea gigas]
F01.PB1708	[I]	Lipid transport and metabolism	Molecular Function: catalytic activity (GO:0003824);; Biological Process: metabolic process (GO:0008152);;	K07511|2.08253e-125|lgi:LOTGIDRAFT_229152|hypothetical protein; K07511 enoyl-CoA hydratase [EC:4.2.1.17] (A)	ko00062:Fatty acid elongation;ko00071:Fatty acid degradation;ko00280:Valine, leucine and isoleucine degradation;ko00310:Lysine degradation;ko00380:Tryptophan metabolism;ko00410:beta-Alanine metabolism;ko00640:Propanoate metabolism;ko00650:Butanoate metabolism;ko01200:Carbon metabolism;ko01212:Fatty acid metabolism	[I]	Lipid transport and metabolism	Enoyl-CoA hydratase/isomerase family	Probable enoyl-CoA hydratase, mitochondrial GN=ech-6 OS=Caenorhabditis elegans PE=1 SV=1	I	Lipid transport and metabolism	hypothetical protein LOTGIDRAFT_229152 [Lottia gigantea]
F01.PB20340	--	--	--	K03847|1.54157e-104|bfo:BRAFLDRAFT_72229|hypothetical protein; K03847 alpha-1,6-mannosyltransferase [EC:2.4.1.260] (A)	ko00510:N-Glycan biosynthesis	[MU]	--	Alg9-like mannosyltransferase family;; Alg9-like mannosyltransferase family	Probable Dol-P-Man:Man(7)GlcNAc(2)-PP-Dol alpha-1,6-mannosyltransferase GN=CG8412 OS=Drosophila melanogaster (Fruit fly) PE=2 SV=1	S	Function unknown	Putative dolichyl-P-Man:Man(7)GlcNAc(2)-PP-dolichyl-alpha-1, 6-mannosyltransferase [Crassostrea gigas]
F01.PB218	[J]	Translation, ribosomal structure and biogenesis	Cellular Component: ribosome (GO:0005840);;	K02967|1.17527e-78|ngi:103742829|Mrps2; mitochondrial ribosomal protein S2; K02967 small subunit ribosomal protein S2 (A)	ko03010:Ribosome	[J]	Translation, ribosomal structure and biogenesis	Ribosomal protein S2	30S ribosomal protein S2, organellar chromatophore GN=rps2 OS=Paulinella chromatophora PE=3 SV=1	J	Translation, ribosomal structure and biogenesis	hypothetical protein CAPTEDRAFT_21914 [Capitella teleta]
F01.PB12018	--	--	Molecular Function: DNA-directed RNA polymerase activity (GO:0003899);; Cellular Component: DNA-directed RNA polymerase II, core complex (GO:0005665);; Biological Process: transcription from RNA polymerase II promoter (GO:0006366);; Biological Process: mitotic G2 DNA damage checkpoint (GO:0007095);;	K03016|4.80701e-62|cmk:103184435|polr2h; polymerase (RNA) II (DNA directed) polypeptide H; K03016 DNA-directed RNA polymerases I, II, and III subunit RPABC3 (A)	ko00230:Purine metabolism;ko00240:Pyrimidine metabolism;ko03020:RNA polymerase;ko04623:Cytosolic DNA-sensing pathway	[K]	Transcription	RNA polymerase Rpb8	Probable DNA-directed RNA polymerases I, II, and III subunit RPABC3 {ECO:0000250|UniProtKB:Q19826} OS=Caenorhabditis briggsae PE=3 SV=1	K	Transcription	DNA-directed RNA polymerases I/II/III subunit rpabc3 [Crassostrea ariakensis]
F01.PB1320	--	--	--	--	--	[TV]	--	MAM domain;; Lectin C-type domain	MAM and LDL-receptor class A domain-containing protein 1 (Fragment) OS=Acropora millepora (Staghorn coral) PE=1 SV=1	S	Function unknown	C-type lectin [Pinctada fucata]
F01.PB12834	--	--	--	K08883|2.78616e-12|tru:101073124|E3 ubiquitin-protein ligase TRIM33-like; K08883 tripartite motif-containing protein 33 [EC:6.3.2.19] (A)	--	[O]	Posttranslational modification, protein turnover, chaperones	B-box zinc finger	--	S	Function unknown	Tripartite motif-containing protein 56 [Crassostrea gigas]
F01.PB18903	--	--	--	K11997|6.28925e-13|bfo:BRAFLDRAFT_86868|hypothetical protein; K11997 tripartite motif-containing protein 2/3 (A)	--	[O]	Posttranslational modification, protein turnover, chaperones	B-box zinc finger	--	S	Function unknown	Tripartite motif-containing protein 56 [Crassostrea gigas]
F01.PB4665	--	--	--	K17790|1.18671e-16|rno:79463|Timm22; translocase of inner mitochondrial membrane 22 homolog (yeast); K17790 mitochondrial import inner membrane translocase subunit TIM22 (A)	--	[U]	Intracellular trafficking, secretion, and vesicular transport	Tim17/Tim22/Tim23/Pmp24 family	Mitochondrial import inner membrane translocase subunit tim-22 GN=tim-22 OS=Caenorhabditis elegans PE=3 SV=1	O	Posttranslational modification, protein turnover, chaperones	Mitochondrial import inner membrane translocase subunit Tim22 [Crassostrea gigas]
F01.PB3868	--	--	Molecular Function: transferase activity, transferring phosphorus-containing groups (GO:0016772);;	K04361|1.7216e-56|lgi:LOTGIDRAFT_139618|hypothetical protein; K04361 epidermal growth factor receptor [EC:2.7.10.1] (A)	ko04068:FoxO signaling pathway;ko04144:Endocytosis;ko04320:Dorso-ventral axis formation	[T]	Signal transduction mechanisms	Receptor L domain	Epidermal growth factor receptor (Precursor) GN=Egfr OS=Drosophila melanogaster (Fruit fly) PE=1 SV=3	T	Signal transduction mechanisms	epidermal growth factor receptor [Haliotis diversicolor]
F01.PB17011	--	--	Biological Process: single-organism cellular process (GO:0044763);; Biological Process: single-organism developmental process (GO:0044767);; Biological Process: system development (GO:0048731);;	--	--	--	--	PDGF/VEGF domain	--	S	Function unknown	hypothetical protein LOTGIDRAFT_165019 [Lottia gigantea]
F01.PB11951	[R]	General function prediction only	--	--	--	[Z]	Cytoskeleton	WD domain, G-beta repeat	Dynein intermediate chain 2, ciliary OS=Heliocidaris crassispina (Sea urchin) PE=2 SV=1	S	Function unknown	WD repeat-containing protein 78 [Crassostrea gigas]
F01.PB9183	--	--	--	--	--	--	--	PMP-22/EMP/MP20/Claudin tight junction;; PMP-22/EMP/MP20/Claudin family;; Lipoma HMGIC fusion partner-like protein	--	--	--	--
F01.PB16352	--	--	--	--	--	[S]	Function unknown	Uncharacterised conserved protein (DUF2305);; Uncharacterised conserved protein (DUF2305)	UPF0554 protein GN=DDB_G0286581 OS=Dictyostelium discoideum (Slime mold) PE=3 SV=1	S	Function unknown	UPF0554 protein C2orf43-like protein [Crassostrea gigas]
F01.PB6015	--	--	--	K14765|5.81242e-40|lgi:LOTGIDRAFT_224176|hypothetical protein; K14765 U3 small nucleolar ribonucleoprotein protein LCP5 (A)	--	[A]	RNA processing and modification	--	--	S	Function unknown	Neuroguidin-A, partial [Stegodyphus mimosarum]
F01.PB19828	[O]	Posttranslational modification, protein turnover, chaperones	Molecular Function: threonine-type endopeptidase activity (GO:0004298);; Cellular Component: nucleus (GO:0005634);; Cellular Component: cytoplasm (GO:0005737);; Cellular Component: proteasome core complex (GO:0005839);; Biological Process: proteolysis involved in cellular protein catabolic process (GO:0051603);;	K02739|3.68702e-80|lgi:LOTGIDRAFT_231140|hypothetical protein; K02739 20S proteasome subunit beta 2 [EC:3.4.25.1] (A)	ko03050:Proteasome	[O]	Posttranslational modification, protein turnover, chaperones	Proteasome subunit	Proteasome subunit beta type-7 (Precursor) GN=psmB7 OS=Dictyostelium discoideum (Slime mold) PE=3 SV=1	O	Posttranslational modification, protein turnover, chaperones	Proteasome subunit beta type-7 [Crassostrea gigas]
F01.PB7879	[R]	General function prediction only	Molecular Function: catalytic activity (GO:0003824);; Biological Process: metabolic process (GO:0008152);;	K18398|7.5897e-127|lgi:LOTGIDRAFT_214482|hypothetical protein; K18398 ectonucleotide pyrophosphatase/phosphodiesterase family member 5 [EC:3.1.-.-] (A)	--	[R]	General function prediction only	Type I phosphodiesterase / nucleotide pyrophosphatase;; Type I phosphodiesterase / nucleotide pyrophosphatase	Ectonucleotide pyrophosphatase/phosphodiesterase C27A7.1 GN=C27A7.1 OS=Caenorhabditis elegans PE=1 SV=1	S	Function unknown	hypothetical protein LOTGIDRAFT_214482 [Lottia gigantea]
F01.PB6256	--	--	Molecular Function: arginine kinase activity (GO:0004054);; Molecular Function: ATP binding (GO:0005524);; Biological Process: phosphorylation (GO:0016310);;	K00933|3.7652e-70|lgi:LOTGIDRAFT_183052|hypothetical protein; K00933 creatine kinase [EC:2.7.3.2] (A)	ko00330:Arginine and proline metabolism	[C]	Energy production and conversion	ATP:guanido phosphotransferase, N-terminal domain;; ATP:guanido phosphotransferase, C-terminal catalytic domain;; ATP:guanido phosphotransferase, C-terminal catalytic domain	Arginine kinase OS=Haliotis madaka (Giant abalone) PE=2 SV=1	E	Amino acid transport and metabolism	arginine kinase [Meretrix meretrix]
F01.PB1624	[R]	General function prediction only	Cellular Component: katanin complex (GO:0008352);; Molecular Function: myosin heavy chain kinase activity (GO:0016905);; Cellular Component: Set1C/COMPASS complex (GO:0048188);; Biological Process: microtubule severing (GO:0051013);; Biological Process: histone H3-K4 trimethylation (GO:0080182);;	K14962|0|lgi:LOTGIDRAFT_231033|hypothetical protein; K14962 COMPASS component SWD2 (A)	ko03015:mRNA surveillance pathway	[ABO]	--	WD domain, G-beta repeat;; Nucleoporin Nup120/160	WD repeat-containing protein 82 {ECO:0000250|UniProtKB:Q6UXN9} OS=Drosophila melanogaster (Fruit fly) PE=1 SV=1	S	Function unknown	hypothetical protein LOTGIDRAFT_231033 [Lottia gigantea]
F01.PB1467	--	--	Molecular Function: binding (GO:0005488);;	K13152|7.99344e-33|bfo:BRAFLDRAFT_219108|hypothetical protein; K13152 U11/U12 small nuclear ribonucleoprotein 20 kDa protein (A)	--	[A]	RNA processing and modification	U1 zinc finger;; Zinc finger C-x8-C-x5-C-x3-H type (and similar)	--	A	RNA processing and modification	hypothetical protein BRAFLDRAFT_219108 [Branchiostoma floridae]
F01.PB66	--	--	--	K15262|4.68722e-45|nvi:100119082|protein BCCIP homolog; K15262 protein BCP1 (A)	--	[R]	General function prediction only	p21-C-terminal region-binding protein;; p21-C-terminal region-binding protein	Protein BCCIP homolog GN=CG9286 OS=Drosophila melanogaster (Fruit fly) PE=2 SV=2	U	Intracellular trafficking, secretion, and vesicular transport	BCCIP-like protein [Crassostrea gigas]
F01.PB22699	--	--	--	K04803|1.4151e-74|lgi:LOTGIDRAFT_226561|hypothetical protein; K04803 nicotinic acetylcholine receptor alpha-1 (A)	ko04080:Neuroactive ligand-receptor interaction	[U]	Intracellular trafficking, secretion, and vesicular transport	Neurotransmitter-gated ion-channel ligand binding domain;; Neurotransmitter-gated ion-channel transmembrane region	Acetylcholine receptor subunit alpha-like 2 (Precursor) GN=CG6844 OS=Drosophila melanogaster (Fruit fly) PE=2 SV=1	U	Intracellular trafficking, secretion, and vesicular transport	Neuronal acetylcholine receptor subunit alpha-3 [Crassostrea gigas]
F01.PB16198	--	--	--	--	--	--	--	--	Serine protease inhibitor Cvsi-2 {ECO:0000303|PubMed:19464375} (Precursor) OS=Crassostrea virginica (Eastern oyster) PE=1 SV=1	--	--	--
F01.PB6850	[C]	Energy production and conversion	Cellular Component: mitochondrial respiratory chain complex II (GO:0005749);; Cellular Component: microtubule associated complex (GO:0005875);; Biological Process: tricarboxylic acid cycle (GO:0006099);; Biological Process: mitochondrial electron transport, succinate to ubiquinone (GO:0006121);; Molecular Function: succinate dehydrogenase (ubiquinone) activity (GO:0008177);; Molecular Function: e…	K00235|1.49144e-135|lgi:LOTGIDRAFT_160203|hypothetical protein; K00235 succinate dehydrogenase (ubiquinone) iron-sulfur subunit [EC:1.3.5.1] (A)	ko00020:Citrate cycle (TCA cycle);ko00190:Oxidative phosphorylation;ko01200:Carbon metabolism	[C]	Energy production and conversion	2Fe-2S iron-sulfur cluster binding domain;; 4Fe-4S dicluster domain;; 4Fe-4S dicluster domain;; 4Fe-4S dicluster domain	Succinate dehydrogenase [ubiquinone] iron-sulfur subunit, mitochondrial (Precursor) GN=SdhB OS=Drosophila melanogaster (Fruit fly) PE=2 SV=2	C	Energy production and conversion	PREDICTED: succinate dehydrogenase [ubiquinone] iron-sulfur subunit, mitochondrial-like [Aplysia californica]
F01.PB19404	[D]	Cell cycle control, cell division, chromosome partitioning	Biological Process: regulation of cyclin-dependent protein serine/threonine kinase activity (GO:0000079);; Cellular Component: nucleus (GO:0005634);; Biological Process: mitotic nuclear division (GO:0007067);; Molecular Function: protein kinase binding (GO:0019901);; Biological Process: cell division (GO:0051301);;	K05868|1.32557e-168|lgi:LOTGIDRAFT_164886|hypothetical protein; K05868 cyclin B (A)	ko04068:FoxO signaling pathway	[D]	Cell cycle control, cell division, chromosome partitioning	Cyclin, N-terminal domain;; Cyclin, C-terminal domain	G2/mitotic-specific cyclin-B OS=Spisula solidissima (Atlantic surf-clam) PE=2 SV=1	D	Cell cycle control, cell division, chromosome partitioning	RecName: Full=G2/mitotic-specific cyclin-B [Spisula solidissima]
F01.PB7272	[L]	Replication, recombination and repair	Molecular Function: DNA binding (GO:0003677);; Molecular Function: DNA helicase activity (GO:0003678);; Molecular Function: ATP binding (GO:0005524);; Cellular Component: nucleus (GO:0005634);; Biological Process: DNA replication initiation (GO:0006270);; Biological Process: DNA duplex unwinding (GO:0032508);; Cellular Component: MCM complex (GO:0042555);;	K02210|0|lgi:LOTGIDRAFT_188306|hypothetical protein; K02210 DNA replication licensing factor MCM7 [EC:3.6.4.12] (A)	ko03030:DNA replication	[L]	Replication, recombination and repair	MCM2/3/5 family;; MCM N-terminal domain;; Magnesium chelatase, subunit ChlI;; AAA domain (dynein-related subfamily)	DNA replication licensing factor Mcm7 GN=Mcm7 OS=Drosophila melanogaster (Fruit fly) PE=1 SV=1	L	Replication, recombination and repair	DNA replication licensing factor mcm7 [Crassostrea gigas]
F01.PB2648	[J]	Translation, ribosomal structure and biogenesis	Cellular Component: intracellular (GO:0005622);; Molecular Function: rRNA binding (GO:0019843);;	K14560|4.22456e-16|hro:HELRODRAFT_73105|hypothetical protein; K14560 U3 small nucleolar ribonucleoprotein protein IMP3 (A)	ko03008:Ribosome biogenesis in eukaryotes	[A]	RNA processing and modification	--	--	J	Translation, ribosomal structure and biogenesis	hypothetical protein CGI_10013185 [Crassostrea gigas]
F01.PB3638	--	--	--	--	--	[R]	General function prediction only	--	--	L	Replication, recombination and repair	PREDICTED: uncharacterized protein LOC102800452 [Saccoglossus kowalevskii]
F01.PB19054	--	--	Molecular Function: aspartic-type endopeptidase activity (GO:0004190);; Cellular Component: integral component of membrane (GO:0016021);;	K09598|1.30834e-120|lgi:LOTGIDRAFT_180068|hypothetical protein; K09598 signal peptide peptidase-like 3 [EC:3.4.23.-] (A)	--	[S]	Function unknown	Signal peptide peptidase	Intramembrane protease 2 GN=imp-2 OS=Caenorhabditis elegans PE=1 SV=1	U	Intracellular trafficking, secretion, and vesicular transport	Signal peptide peptidase-like 3 [Crassostrea gigas]
F01.PB13625	--	--	Molecular Function: guanylate kinase activity (GO:0004385);; Cellular Component: septate junction (GO:0005918);; Cellular Component: lateral plasma membrane (GO:0016328);; Biological Process: septate junction assembly (GO:0019991);; Biological Process: dorsal trunk growth, open tracheal system (GO:0035001);; Biological Process: regulation of tube length, open tracheal system (GO:0035159);;	--	--	[T]	Signal transduction mechanisms	L27 domain;; PDZ domain (Also known as DHR or GLGF);; Guanylate kinase	Peripheral plasma membrane protein CASK GN=CASK OS=Drosophila melanogaster (Fruit fly) PE=1 SV=4	F	Nucleotide transport and metabolism	PREDICTED: MAGUK p55 subfamily member 6 isoform X2 [Apis mellifera]
F01.PB7925	[R]	General function prediction only	--	K03363|4.0894e-70|spu:576371|cdc20; cell division cycle 20 homolog (S. cerevisiae); K03363 cell division cycle 20, cofactor of APC complex (A)	ko04120:Ubiquitin mediated proteolysis	[DO]	--	WD domain, G-beta repeat	Anaphase-promoting complex subunit cdc20 GN=cdc20 OS=Dictyostelium discoideum (Slime mold) PE=1 SV=1	D	Cell cycle control, cell division, chromosome partitioning	PREDICTED: cell division cycle protein 20 homolog [Strongylocentrotus purpuratus]
F01.PB5580	--	--	Molecular Function: protein binding (GO:0005515);;	K09555|1.19115e-46|lgi:LOTGIDRAFT_202646|hypothetical protein; K09555 BCL2-associated athanogene 1 (A)	ko04141:Protein processing in endoplasmic reticulum	--	--	BAG domain;; Ubiquitin family	BAG family molecular chaperone regulator 1 GN=bag-1 OS=Caenorhabditis elegans PE=1 SV=1	O	Posttranslational modification, protein turnover, chaperones	BAG family molecular chaperone regulator 1 [Crassostrea gigas]
F01.PB7931	--	--	Molecular Function: DNA binding (GO:0003677);; Biological Process: DNA metabolic process (GO:0006259);; Molecular Function: hydrolase activity, acting on acid anhydrides (GO:0016817);;	K10885|0|bfo:BRAFLDRAFT_164247|hypothetical protein; K10885 ATP-dependent DNA helicase 2 subunit 2 (A)	ko03450:Non-homologous end-joining	[L]	Replication, recombination and repair	Ku70/Ku80 beta-barrel domain;; Ku70/Ku80 N-terminal alpha/beta domain;; Ku70/Ku80 C-terminal arm;; Ku C terminal domain like	X-ray repair cross-complementing protein 5 GN=ku80 OS=Dictyostelium discoideum (Slime mold) PE=3 SV=1	L	Replication, recombination and repair	ATP-dependent DNA helicase 2 subunit 2 [Crassostrea gigas]
F01.PB19445	--	--	Molecular Function: ion channel activity (GO:0005216);; Biological Process: ion transport (GO:0006811);;	--	--	[R]	General function prediction only	Major Facilitator Superfamily	Uncharacterized protein B0416.5 GN=B0416.5 OS=Caenorhabditis elegans PE=4 SV=1	U	Intracellular trafficking, secretion, and vesicular transport	predicted protein [Nematostella vectensis]
F01.PB17969	--	--	--	--	--	--	--	Cystatin domain	--	--	--	--
F01.PB17185	[O]	Posttranslational modification, protein turnover, chaperones	Biological Process: metabolic process (GO:0008152);; Molecular Function: methyltransferase activity (GO:0008168);;	--	--	[O]	Posttranslational modification, protein turnover, chaperones	Protein-L-isoaspartate(D-aspartate) O-methyltransferase (PCMT);; SOCS box;; Histone methylation protein DOT1	Protein-L-isoaspartate O-methyltransferase GN=pcm-1 OS=Caenorhabditis elegans PE=2 SV=1	O	Posttranslational modification, protein turnover, chaperones	hypothetical protein LOTGIDRAFT_190456 [Lottia gigantea]
F01.PB7531	[Z]	Cytoskeleton	--	--	--	[Z]	Cytoskeleton	Calponin homology (CH) domain	Myophilin OS=Echinococcus granulosus (Hydatid tapeworm) PE=2 SV=1	Z	Cytoskeleton	hypothetical protein LOTGIDRAFT_210431 [Lottia gigantea]
F01.PB10092	--	--	--	--	--	[TW]	--	--	--	S	Function unknown	Endothelial cells scavenger receptor [Crassostrea gigas]
F01.PB2621	[J]	Translation, ribosomal structure and biogenesis	Molecular Function: translation release factor activity (GO:0003747);;	K02835|2.77565e-87|xtr:100380155|mtrf1l, mrf1l, mtrf1, mtrf1a; mitochondrial translational release factor 1-like; K02835 peptide chain release factor 1 (A)	--	[J]	Translation, ribosomal structure and biogenesis	RF-1 domain;; PCRF domain;; PCRF domain	Probable peptide chain release factor 1, mitochondrial (Precursor) GN=W03F8.3 OS=Caenorhabditis elegans PE=3 SV=1	J	Translation, ribosomal structure and biogenesis	PREDICTED: peptide chain release factor 1-like, mitochondrial-like [Saccoglossus kowalevskii]
F01.PB14904	--	--	Molecular Function: monooxygenase activity (GO:0004497);;	--	--	[O]	Posttranslational modification, protein turnover, chaperones	Copper type II ascorbate-dependent monooxygenase, C-terminal domain;; Copper type II ascorbate-dependent monooxygenase, N-terminal domain	Peptidylglycine alpha-hydroxylating monooxygenase (Precursor) GN=Phm OS=Drosophila melanogaster (Fruit fly) PE=1 SV=2	S	Function unknown	hypothetical protein CAPTEDRAFT_156752 [Capitella teleta]
F01.PB6181	--	--	--	--	--	[Z]	Cytoskeleton	Cofilin/tropomyosin-type actin-binding protein	Coactosin GN=coaA OS=Dictyostelium discoideum (Slime mold) PE=1 SV=1	O	Posttranslational modification, protein turnover, chaperones	cyclic AMP-regulated protein like protein [Marsupenaeus japonicus]
F01.PB18758	[O]	Posttranslational modification, protein turnover, chaperones	Molecular Function: nucleotide binding (GO:0000166);; Molecular Function: ATP-dependent peptidase activity (GO:0004176);; Cellular Component: mitochondrial inner membrane (GO:0005743);; Biological Process: protein metabolic process (GO:0019538);;	K08955|0|hro:HELRODRAFT_65229|hypothetical protein; K08955 ATP-dependent metalloprotease [EC:3.4.24.-] (A)	--	[O]	Posttranslational modification, protein turnover, chaperones	Peptidase family M41;; ATPase family associated with various cellular activities (AAA);; Holliday junction DNA helicase ruvB N-terminus;; AAA domain (dynein-related subfamily)	ATP-dependent zinc metalloprotease YME1 homolog GN=ymel-1 OS=Caenorhabditis elegans PE=3 SV=2	O	Posttranslational modification, protein turnover, chaperones	PREDICTED: ATP-dependent zinc metalloprotease YME1L1-like isoform X2 [Aplysia californica]
F01.PB6660	[R]	General function prediction only	--	--	--	[R]	General function prediction only	RNA recognition motif. (a.k.a. RRM, RBD, or RNP domain);; RNA recognition motif (a.k.a. RRM, RBD, or RNP domain);; RNA recognition motif. (a.k.a. RRM, RBD, or RNP domain);; RNA binding motif	Heterogeneous nuclear ribonucleoprotein A1, A2/B1 homolog GN=HNRNP OS=Schistocerca americana (American grasshopper) PE=2 SV=1	S	Function unknown	hypothetical protein LOTGIDRAFT_128275 [Lottia gigantea]
F01.PB21255	--	--	--	K17095|9.95126e-84|lgi:LOTGIDRAFT_219490|hypothetical protein; K17095 annexin A7/11 (A)	--	[U]	Intracellular trafficking, secretion, and vesicular transport	Annexin	Annexin-B12 GN=ANXB12 OS=Hydra vulgaris (Hydra) PE=1 SV=1	S	Function unknown	hypothetical protein LOTGIDRAFT_219490 [Lottia gigantea]
F01.PB2782	--	--	--	--	--	--	--	--	--	--	--	hypothetical protein LOTGIDRAFT_230861 [Lottia gigantea]
F01.PB12989	--	--	--	K08601|0|bfo:BRAFLDRAFT_230143|hypothetical protein; K08601 ubiquitin thioesterase CYLD [EC:3.4.19.12] (A)	--	[R]	General function prediction only	CAP-Gly domain;; Ubiquitin carboxyl-terminal hydrolase;; Ubiquitin carboxyl-terminal hydrolase	--	O	Posttranslational modification, protein turnover, chaperones	Putative ubiquitin carboxyl-terminal hydrolase CYLD [Crassostrea gigas]
F01.PB6952	--	--	--	--	--	--	--	Calponin family repeat	Calponin homolog OV9M OS=Onchocerca volvulus PE=2 SV=2	Z	Cytoskeleton	hypothetical protein HELRODRAFT_186180 [Helobdella robusta]
F01.PB19946	--	--	--	--	--	--	--	Cystatin domain	Cystatin JZTX-75 (Precursor) OS=Chilobrachys guangxiensis (Chinese earth tiger tarantula) PE=2 SV=1	O	Posttranslational modification, protein turnover, chaperones	cysteine proteases inhibitor [Haliotis discus hannai]
F01.PB17289	--	--	--	--	--	[Z]	Cytoskeleton	Plectin repeat	--	Z	Cytoskeleton	hypothetical protein LOTGIDRAFT_232953 [Lottia gigantea]
F01.PB2053	[TZDR]	--	--	K02183|1.42816e-39|lgi:LOTGIDRAFT_159645|hypothetical protein; K02183 calmodulin (A)	ko04070:Phosphatidylinositol signaling system	[T]	Signal transduction mechanisms	--	Calmodulin OS=Plasmodium falciparum PE=3 SV=4	DTZ	--	hypothetical protein LOTGIDRAFT_159645 [Lottia gigantea]
F01.PB2379	--	--	--	--	--	--	--	von Willebrand factor type C domain	--	S	Function unknown	hypothetical protein BRAFLDRAFT_79552 [Branchiostoma floridae]
F01.PB9468	[CI]	--	Molecular Function: binding (GO:0005488);;	--	--	[HC]	--	Oxidoreductase NAD-binding domain;; Oxidoreductase FAD-binding domain;; Cytochrome b5-like Heme/Steroid binding domain	NADH-cytochrome b5 reductase 1 GN=cyb5r1 OS=Dictyostelium discoideum (Slime mold) PE=3 SV=1	CI	--	Cytochrome b5 reductase 4 [Crassostrea gigas]
F01.PB13794	--	--	--	--	--	--	--	C2H2-type zinc finger;; C2H2 type zinc-finger (2 copies)	--	--	--	hypothetical protein LOTGIDRAFT_164505 [Lottia gigantea]
F01.PB19610	--	--	--	--	--	--	--	Uncharacterised protein family, YAP/Alf4/glomulin	--	S	Function unknown	PREDICTED: glomulin-like [Aplysia californica]
F01.PB13351	--	--	Molecular Function: RNA binding (GO:0003723);; Biological Process: RNA processing (GO:0006396);;	K12825|3.02186e-87|lgi:LOTGIDRAFT_190371|hypothetical protein; K12825 splicing factor 3A subunit 1 (A)	ko03040:Spliceosome	[A]	RNA processing and modification	Pre-mRNA splicing factor PRP21 like protein;; Surp module;; Ubiquitin family;; Surp module	Probable splicing factor 3A subunit 1 GN=sf3a1 OS=Dictyostelium discoideum (Slime mold) PE=3 SV=1	A	RNA processing and modification	Splicing factor 3 subunit 1 [Crassostrea gigas]
F01.PB7774	[TZDR]	--	--	K02183|2.20325e-55|lgi:LOTGIDRAFT_77179|hypothetical protein; K02183 calmodulin (A)	ko04070:Phosphatidylinositol signaling system	[T]	Signal transduction mechanisms	EF-hand domain pair;; EF hand;; EF hand;; EF-hand domain pair;; EF-hand domain;; EF-hand domain;; Secreted protein acidic and rich in cysteine Ca binding region;; Cytoskeletal-regulatory complex EF hand	Calmodulin OS=Physarum polycephalum (Slime mold) PE=2 SV=3	DTZ	--	hypothetical protein LOTGIDRAFT_77179, partial [Lottia gigantea]
F01.PB11622	--	--	Biological Process: transport (GO:0006810);; Cellular Component: membrane (GO:0016020);;	K14389|1.25568e-135|spu:593500|sodium/glucose cotransporter 4-like; K14389 solute carrier family 5 (sodium/glucose cotransporter), member 9 (A)	--	[P]	Inorganic ion transport and metabolism	Sodium:solute symporter family;; Sodium:solute symporter family	--	S	Function unknown	PREDICTED: sodium/glucose cotransporter 4-like [Strongylocentrotus purpuratus]
F01.PB19325	--	--	--	--	--	--	--	--	--	--	--	hypothetical protein LOTGIDRAFT_232122 [Lottia gigantea]
F01.PB12837	--	--	--	--	--	--	--	B-box zinc finger;; Fibronectin type III domain;; 50S ribosome-binding GTPase;; Septin;; AIG1 family	--	S	Function unknown	hypothetical protein CGI_10010969 [Crassostrea gigas]
F01.PB2423	[H]	Coenzyme transport and metabolism	Molecular Function: ATP binding (GO:0005524);; Molecular Function: oxidoreductase activity, acting on the CH-OH group of donors, NAD or NADP as acceptor (GO:0016616);; Molecular Function: metal ion binding (GO:0046872);; Molecular Function: cofactor binding (GO:0048037);; Biological Process: oxidation-reduction process (GO:0055114);;	K12164|7.88736e-169|lgi:LOTGIDRAFT_236214|hypothetical protein; K12164 ubiquitin-like modifier-activating enzyme 5 (A)	--	[H]	Coenzyme transport and metabolism	ThiF family	Ubiquitin-like modifier-activating enzyme 5 GN=BRAFLDRAFT_113714 OS=Branchiostoma floridae (Florida lancelet) PE=3 SV=1	H	Coenzyme transport and metabolism	Ubiquitin-like modifier-activating enzyme 5 [Crassostrea gigas]
F01.PB15970	--	--	--	--	--	--	--	Chitobiase/beta-hexosaminidase C-terminal domain;; Chitobiase/beta-hexosaminidase C-terminal domain;; Fn3 associated	--	S	Function unknown	PREDICTED: uncharacterized protein LOC101845075 [Aplysia californica]
F01.PB20185	--	--	--	--	--	[Q]	Secondary metabolites biosynthesis, transport and catabolism	Organic Anion Transporter Polypeptide (OATP) family;; Major Facilitator Superfamily	--	P	Inorganic ion transport and metabolism	Solute carrier organic anion transporter family member 4C1 [Crassostrea gigas]
F01.PB10377	--	--	Molecular Function: oxidoreductase activity, acting on a sulfur group of donors, disulfide as acceptor (GO:0016671);;	K07305|4.0648e-64|lgi:LOTGIDRAFT_158925|hypothetical protein; K07305 peptide-methionine (R)-S-oxide reductase [EC:1.8.4.12] (A)	--	[O]	Posttranslational modification, protein turnover, chaperones	SelR domain	Methionine-R-sulfoxide reductase B1 GN=SelR OS=Drosophila melanogaster (Fruit fly) PE=1 SV=3	O	Posttranslational modification, protein turnover, chaperones	Methionine-R-sulfoxide reductase B3, mitochondrial [Crassostrea gigas]
F01.PB1157	--	--	--	--	--	--	--	Cadherin domain	--	--	--	--
F01.PB13274	[C]	Energy production and conversion	Molecular Function: ATP citrate synthase activity (GO:0003878);; Molecular Function: succinate-CoA ligase (ADP-forming) activity (GO:0004775);; Biological Process: metabolic process (GO:0008152);; Molecular Function: cofactor binding (GO:0048037);;	K01899|3.86732e-147|lgi:LOTGIDRAFT_218036|hypothetical protein; K01899 succinyl-CoA synthetase alpha subunit [EC:6.2.1.4 6.2.1.5] (A)	ko00020:Citrate cycle (TCA cycle);ko00640:Propanoate metabolism;ko01200:Carbon metabolism	[C]	Energy production and conversion	CoA binding domain;; CoA-ligase;; Succinyl-CoA ligase like flavodoxin domain;; CoA binding domain	Succinyl-CoA ligase [ADP/GDP-forming] subunit alpha, mitochondrial (Precursor) GN=Scsalpha OS=Drosophila melanogaster (Fruit fly) PE=2 SV=3	C	Energy production and conversion	hypothetical protein LOTGIDRAFT_218036 [Lottia gigantea]
F01.PB5869	--	--	--	--	--	[R]	General function prediction only	BTB/POZ domain	--	S	Function unknown	hypothetical protein CAPTEDRAFT_65092, partial [Capitella teleta]
F01.PB11444	[T]	Signal transduction mechanisms	Molecular Function: monooxygenase activity (GO:0004497);; Cellular Component: nucleus (GO:0005634);; Cellular Component: cytoplasm (GO:0005737);; Biological Process: receptor-mediated endocytosis (GO:0006898);; Biological Process: determination of adult lifespan (GO:0008340);; Biological Process: embryo development ending in birth or egg hatching (GO:0009792);; Biological Process: oviposition (GO…	K16197|3.05913e-99|cbr:CBG17289|Cbr-ftt-2; C. briggsae CBR-FTT-2 protein; K16197 14-3-3 protein beta/theta/zeta (A)	--	[O]	Posttranslational modification, protein turnover, chaperones	14-3-3 protein	14-3-3-like protein 2 GN=ftt-2 OS=Caenorhabditis elegans PE=1 SV=1	T	Signal transduction mechanisms	14-3-3 protein zeta [Crassostrea gigas]
F01.PB18885	--	--	--	K12026|6.99819e-13|bfo:BRAFLDRAFT_104269|hypothetical protein; K12026 tripartite motif-containing protein 56 [EC:6.3.2.19] (A)	--	[O]	Posttranslational modification, protein turnover, chaperones	B-box zinc finger	--	S	Function unknown	Tripartite motif-containing protein 56 [Crassostrea gigas]
F01.PB19783	--	--	--	--	--	--	--	--	--	S	Function unknown	predicted protein [Nematostella vectensis]
F01.PB20321	--	--	Cellular Component: integral component of membrane (GO:0016021);;	K17086|0|api:100165923|transmembrane 9 superfamily member 2; K17086 transmembrane 9 superfamily member 2/4 (A)	--	[U]	Intracellular trafficking, secretion, and vesicular transport	Endomembrane protein 70;; Endomembrane protein 70;; Endomembrane protein 70	Putative phagocytic receptor 1a (Precursor) GN=phg1a OS=Dictyostelium discoideum (Slime mold) PE=2 SV=1	S	Function unknown	PREDICTED: transmembrane 9 superfamily member 2 [Acyrthosiphon pisum]
F01.PB22048	[I]	Lipid transport and metabolism	Molecular Function: binding (GO:0005488);; Molecular Function: oxidoreductase activity (GO:0016491);;	--	--	[I]	Lipid transport and metabolism	3-hydroxyacyl-CoA dehydrogenase, NAD binding domain;; Zinc finger, C3HC4 type (RING finger);; NAD binding domain of 6-phosphogluconate dehydrogenase;; Zinc finger, C3HC4 type (RING finger);; NAD-dependent glycerol-3-phosphate dehydrogenase N-terminus;; NADP oxidoreductase coenzyme F420-dependent	Probable 3-hydroxyacyl-CoA dehydrogenase B0272.3 GN=B0272.3 OS=Caenorhabditis elegans PE=1 SV=1	I	Lipid transport and metabolism	hypothetical protein CAPTEDRAFT_222534 [Capitella teleta]
F01.PB21562	--	--	Biological Process: cell communication (GO:0007154);; Molecular Function: phosphatidylinositol binding (GO:0035091);;	K17920|0|lgi:LOTGIDRAFT_225261|hypothetical protein; K17920 sorting nexin-5/6/32 (A)	--	[V]	Defense mechanisms	Vps5 C terminal like;; PX domain;; BAR domain	--	U	Intracellular trafficking, secretion, and vesicular transport	Sorting nexin-6 [Crassostrea gigas]
F01.PB1034	[R]	General function prediction only	--	K14773|9.90218e-44|lgi:LOTGIDRAFT_208313|hypothetical protein; K14773 U3 small nucleolar RNA-associated protein 23 (A)	--	[R]	General function prediction only	Fcf1	--	S	Function unknown	UTP23 small subunit processome complex, partial [Ostrea edulis]
F01.PB18544	--	--	--	--	--	[U]	Intracellular trafficking, secretion, and vesicular transport	--	Putative vacuolar protein sorting-associated protein 13F GN=vps13F OS=Dictyostelium discoideum (Slime mold) PE=3 SV=1	U	Intracellular trafficking, secretion, and vesicular transport	hypothetical protein LOTGIDRAFT_160876 [Lottia gigantea]
F01.PB10994	--	--	Cellular Component: lysosome (GO:0005764);; Biological Process: autophagy (GO:0006914);; Biological Process: cell communication (GO:0007154);; Cellular Component: organelle membrane (GO:0031090);; Cellular Component: intracellular organelle part (GO:0044446);; Biological Process: single organism signaling (GO:0044700);; Biological Process: regulation of biological process (GO:0050789);; Biologica…	--	--	[P]	Inorganic ion transport and metabolism	--	--	U	Intracellular trafficking, secretion, and vesicular transport	Mucolipin-3 [Crassostrea gigas]
F01.PB13619	[K]	Transcription	Molecular Function: sequence-specific DNA binding transcription factor activity (GO:0003700);; Biological Process: regulation of transcription, DNA-templated (GO:0006355);; Molecular Function: zinc ion binding (GO:0008270);; Molecular Function: sequence-specific DNA binding (GO:0043565);;	K17894|2.25127e-56|xla:399273|gata2, xgata-2, xgata2; GATA binding protein 2; K17894 GATA-binding protein 2 (A)	--	[K]	Transcription	GATA zinc finger	GATA-binding factor C GN=grn OS=Drosophila melanogaster (Fruit fly) PE=2 SV=1	K	Transcription	GATA-binding factor [Azumapecten farreri]
F01.PB12856	--	--	Biological Process: transport (GO:0006810);; Cellular Component: membrane (GO:0016020);;	K15118|2.44239e-94|lgi:LOTGIDRAFT_235746|hypothetical protein; K15118 solute carrier family 25, member 38 (A)	--	[C]	Energy production and conversion	Mitochondrial carrier protein;; Mitochondrial carrier protein	Mitochondrial substrate carrier family protein M GN=mcfM OS=Dictyostelium discoideum (Slime mold) PE=3 SV=1	U	Intracellular trafficking, secretion, and vesicular transport	hypothetical protein LOTGIDRAFT_235746 [Lottia gigantea]
F01.PB5384	[E]	Amino acid transport and metabolism	Molecular Function: argininosuccinate lyase activity (GO:0004056);; Biological Process: arginine biosynthetic process via ornithine (GO:0042450);;	K01755|6.41683e-142|lgi:LOTGIDRAFT_200177|hypothetical protein; K01755 argininosuccinate lyase [EC:4.3.2.1] (A)	ko00250:Alanine, aspartate and glutamate metabolism;ko00330:Arginine and proline metabolism;ko01230:Biosynthesis of amino acids	[E]	Amino acid transport and metabolism	Lyase;; Argininosuccinate lyase C-terminal	--	E	Amino acid transport and metabolism	hypothetical protein LOTGIDRAFT_200177 [Lottia gigantea]
F01.PB20320	--	--	--	K16061|1.90139e-09|acs:100560580|birc7; baculoviral IAP repeat containing 7; K16061 baculoviral IAP repeat-containing protein 7/8 (A)	ko04120:Ubiquitin mediated proteolysis;ko04210:Apoptosis	[DR]	--	Inhibitor of Apoptosis domain	Apoptosis 2 inhibitor GN=Iap2 OS=Drosophila melanogaster (Fruit fly) PE=2 SV=3	O	Posttranslational modification, protein turnover, chaperones	Baculoviral IAP repeat-containing protein 3, partial [Crassostrea gigas]
F01.PB5314	--	--	--	--	--	--	--	Protein of unknown function (DUF1151);; SH3 domain;; Variant SH3 domain	Tyrosine-protein kinase STK GN=STK OS=Hydra vulgaris (Hydra) PE=2 SV=1	S	Function unknown	hypothetical protein CGI_10028134 [Crassostrea gigas]
F01.PB11335	--	--	--	--	--	[S]	Function unknown	Glycosyltransferase family 92	UPF0392 protein F13G3.3 GN=F13G3.3 OS=Caenorhabditis elegans PE=3 SV=2	S	Function unknown	UPF0392 protein F13G3.3 [Crassostrea gigas]
F01.PB19005	--	--	--	--	--	--	--	--	--	--	--	Tyrosine-protein kinase receptor Tie-1 [Crassostrea gigas]
F01.PB15112	[O]	Posttranslational modification, protein turnover, chaperones	Molecular Function: binding (GO:0005488);; Molecular Function: hydrolase activity (GO:0016787);; Cellular Component: intracellular part (GO:0044424);;	--	--	[O]	Posttranslational modification, protein turnover, chaperones	ATPase family associated with various cellular activities (AAA);; LisH;; Holliday junction DNA helicase ruvB N-terminus	Katanin p60 ATPase-containing subunit A1 {ECO:0000255|HAMAP-Rule:MF_03023} OS=Strongylocentrotus purpuratus (Purple sea urchin) PE=1 SV=1	O	Posttranslational modification, protein turnover, chaperones	Katanin p60 ATPase-containing subunit A-like 2 [Crassostrea gigas]
F01.PB7053	--	--	--	--	--	[S]	Function unknown	Cysteine-rich secretory protein family	Cysteine-rich venom protein Mr30 (Precursor) OS=Conus marmoreus (Marble cone) PE=1 SV=1	S	Function unknown	Cysteine-rich secretory protein Mr30 [Crassostrea gigas]
F01.PB14365	--	--	--	--	--	--	--	--	--	T	Signal transduction mechanisms	hypothetical protein LOTGIDRAFT_230973 [Lottia gigantea]
F01.PB4335	--	--	--	--	--	--	--	PMP-22/EMP/MP20/Claudin family	--	--	--	hypothetical protein CGI_10021992 [Crassostrea gigas]
F01.PB12797	[O]	Posttranslational modification, protein turnover, chaperones	Biological Process: protein peptidyl-prolyl isomerization (GO:0000413);; Molecular Function: peptidyl-prolyl cis-trans isomerase activity (GO:0003755);; Cellular Component: extracellular space (GO:0005615);; Cellular Component: lipid particle (GO:0005811);; Cellular Component: microtubule associated complex (GO:0005875);; Biological Process: protein folding (GO:0006457);; Biological Process: mult…	K03768|2.03657e-65|dre:406292|ppib, cb87, sb:cb87, wu:fa97f08, zgc:73214, zgc:86796; peptidylprolyl isomerase B (cyclophilin B) (EC:5.2.1.8); K03768 peptidyl-prolyl cis-trans isomerase B (cyclophilin B) [EC:5.2.1.8] (A)	--	[O]	Posttranslational modification, protein turnover, chaperones	Cyclophilin type peptidyl-prolyl cis-trans isomerase/CLD	Peptidyl-prolyl cis-trans isomerase 6 (Precursor) GN=cyn-6 OS=Caenorhabditis elegans PE=2 SV=1	O	Posttranslational modification, protein turnover, chaperones	predicted protein [Nematostella vectensis]
F01.PB15118	--	--	Molecular Function: DNA binding (GO:0003677);; Molecular Function: sequence-specific DNA binding transcription factor activity (GO:0003700);; Biological Process: regulation of transcription, DNA-templated (GO:0006355);; Cellular Component: CCAAT-binding factor complex (GO:0016602);;	K08064|1.41489e-57|lgi:LOTGIDRAFT_159581|hypothetical protein; K08064 nuclear transcription factor Y, alpha (A)	--	[K]	Transcription	CCAAT-binding transcription factor (CBF-B/NF-YA) subunit B	Nuclear transcription factor Y subunit alpha GN=nfyA OS=Dictyostelium discoideum (Slime mold) PE=3 SV=1	K	Transcription	hypothetical protein LOTGIDRAFT_159581 [Lottia gigantea]
F01.PB8137	[RTKL]	--	Molecular Function: protein kinase activity (GO:0004672);; Biological Process: phosphorylation (GO:0016310);;	K17546|1.51616e-115|nve:NEMVE_v1g204287|hypothetical protein; K17546 probable inactive protein kinase-like protein SgK071 (A)	--	[R]	General function prediction only	Protein kinase domain;; Protein tyrosine kinase;; Protein kinase domain;; Protein tyrosine kinase	Probable serine/threonine-protein kinase nek2 GN=nek2 OS=Dictyostelium discoideum (Slime mold) PE=1 SV=1	T	Signal transduction mechanisms	predicted protein [Nematostella vectensis]
F01.PB4905	[E]	Amino acid transport and metabolism	Molecular Function: exopeptidase activity (GO:0008238);;	K01273|8.45702e-168|lgi:LOTGIDRAFT_200091|hypothetical protein; K01273 membrane dipeptidase [EC:3.4.13.19] (A)	--	[O]	Posttranslational modification, protein turnover, chaperones	Membrane dipeptidase (Peptidase family M19)	--	E	Amino acid transport and metabolism	Dipeptidase 1 [Crassostrea gigas]
F01.PB213	--	--	--	--	--	--	--	--	--	S	Function unknown	predicted protein [Nematostella vectensis]
F01.PB21806	--	--	--	--	--	--	--	F-box-like;; F-box domain	--	--	--	hypothetical protein BRAFLDRAFT_121756 [Branchiostoma floridae]
F01.PB15223	--	--	--	K10249|1.24793e-104|tru:101075102|elongation of very long chain fatty acids protein 4-like; K10249 elongation of very long chain fatty acids protein 4 [EC:2.3.1.199] (A)	ko00062:Fatty acid elongation	[I]	Lipid transport and metabolism	GNS1/SUR4 family;; Predicted membrane protein (DUF2177)	Elongation of very long chain fatty acids protein AAEL008004 GN=AAEL008004 OS=Aedes aegypti (Yellowfever mosquito) PE=2 SV=2	I	Lipid transport and metabolism	PREDICTED: elongation of very long chain fatty acids protein 4-like [Strongylocentrotus purpuratus]
F01.PB17304	[P]	Inorganic ion transport and metabolism	Biological Process: sulfate assimilation (GO:0000103);; Molecular Function: adenylylsulfate kinase activity (GO:0004020);; Molecular Function: sulfate adenylyltransferase (ATP) activity (GO:0004781);; Molecular Function: ATP binding (GO:0005524);; Biological Process: phosphorylation (GO:0016310);;	K13811|0|lgi:LOTGIDRAFT_230274|hypothetical protein; K13811 3'-phosphoadenosine 5'-phosphosulfate synthase [EC:2.7.7.4 2.7.1.25] (A)	ko00230:Purine metabolism;ko00450:Selenocompound metabolism;ko00920:Sulfur metabolism	[F]	Nucleotide transport and metabolism	Adenylylsulphate kinase;; ATP-sulfurylase;; PUA-like domain;; AAA domain;; AAA domain;; AAA domain	Adenylyl-sulfate kinase OS=Urechis caupo (Innkeeper worm) PE=2 SV=1	P	Inorganic ion transport and metabolism	Bifunctional 3&apos;-phosphoadenosine 5&apos;-phosphosulfate synthetase [Crassostrea gigas]
F01.PB11473	--	--	--	--	--	--	--	Methyltransferase FkbM domain	--	--	--	hypothetical protein CGI_10003907 [Crassostrea gigas]
F01.PB1026	--	--	--	K03960|3.83762e-16|lgi:LOTGIDRAFT_229348|hypothetical protein; K03960 NADH dehydrogenase (ubiquinone) 1 beta subcomplex subunit 4 (A)	ko00190:Oxidative phosphorylation	--	--	NADH-ubiquinone oxidoreductase B15 subunit (NDUFB4)	--	C	Energy production and conversion	hypothetical protein LOTGIDRAFT_229348 [Lottia gigantea]
F01.PB17513	--	--	--	--	--	--	--	Endonuclease/Exonuclease/phosphatase family	--	S	Function unknown	PREDICTED: uncharacterized protein LOC100369850 [Saccoglossus kowalevskii]
F01.PB12953	[TZDR]	--	--	K02183|3.91301e-28|asn:102369688|calmodulin-like; K02183 calmodulin (A)	ko04020:Calcium signaling pathway;ko04070:Phosphatidylinositol signaling system;ko04114:Oocyte meiosis;ko04261:Adrenergic signaling in cardiomyocytes;ko04270:Vascular smooth muscle contraction;ko04744:Phototransduction;ko04910:Insulin signaling pathway;ko04912:GnRH signaling pathway;ko04916:Melanogenesis	[T]	Signal transduction mechanisms	EF-hand domain pair;; EF hand;; EF hand;; EF-hand domain pair;; EF-hand domain;; Secreted protein acidic and rich in cysteine Ca binding region;; Cytoskeletal-regulatory complex EF hand;; Ca2+ insensitive EF hand;; Tellurite resistance protein TerB;; RNA 2'-phosphotransferase, Tpt1 / KptA family	Calmodulin OS=Stylonychia lemnae PE=3 SV=2	DTZ	--	Squidulin [Crassostrea gigas]
F01.PB11961	[E]	Amino acid transport and metabolism	--	--	--	[R]	General function prediction only	GMC oxidoreductase;; GMC oxidoreductase;; GMC oxidoreductase	Glucose dehydrogenase [FAD, quinone] short protein (Precursor) GN=Gld OS=Drosophila pseudoobscura pseudoobscura (Fruit fly) PE=3 SV=4	E	Amino acid transport and metabolism	Glucose dehydrogenase [acceptor] [Crassostrea gigas]
F01.PB4371	--	--	Molecular Function: protein tyrosine kinase activity (GO:0004713);; Biological Process: cellular process (GO:0009987);;	K05085|6.13394e-26|cmk:103182941|erbb4; v-erb-b2 avian erythroblastic leukemia viral oncogene homolog 4; K05085 receptor tyrosine-protein kinase erbB-4 [EC:2.7.10.1] (A)	ko04012:ErbB signaling pathway;ko04020:Calcium signaling pathway;ko04144:Endocytosis	[T]	Signal transduction mechanisms	Receptor L domain	Epidermal growth factor receptor (Precursor) GN=Egfr OS=Drosophila melanogaster (Fruit fly) PE=1 SV=3	T	Signal transduction mechanisms	GJ20054 [Drosophila virilis]
F01.PB4542	--	--	Molecular Function: transferase activity (GO:0016740);;	--	--	--	--	Alpha-kinase family	Alpha-protein kinase vwkA GN=vwkA OS=Dictyostelium discoideum (Slime mold) PE=1 SV=1	S	Function unknown	hypothetical protein LOTGIDRAFT_170495 [Lottia gigantea]
[truncated: 16,530 more rows]

## Sheet: 1-2 ISOFORM
QueryName	SubjectName	QhspStart1	QhspEnd1	QhspStart2	QhspEnd2	ShspStart1	ShspEnd1	ShspStart2	ShspEnd2
[truncated: 271 more rows]

[truncated: 4 more sheets: 1-2 note, 1-3 lncRNA, 1-4 lncRNA-target, 1-5 CDS length distribution]
